# Supplementary material
Source: PubMed Central journal article supplement (PMC3530961)
Supplement: jm301328h_si_001.pdf [file jm301328h_si_001.pdf]

# Synthesis and evaluation of $\alpha$ -thymidine analogues as novel antimalarials

Huaqing Cui,<sup>a,b</sup> Juana Carrero-Lérida,<sup>b</sup> Ana P. G. Silva,<sup>c</sup> Jean L. Whittingham,<sup>c</sup> James A. Brannigan,<sup>c</sup> Luis M. Ruiz-Pérez,<sup>b</sup> Kevin D. Read,<sup>a</sup> Keith S. Wilson,<sup>c\*</sup> Dolores González-Pacanowska,<sup>b\*</sup> Ian H. Gilbert<sup>a\*</sup>

*a. Division of Biological Chemistry and Drug Discovery, College of Life Sciences, University of Dundee, Sir James Black Centre, Dundee, DD1 5EH, UK*

*b. Instituto de Parasitología y Biomedicina “López-Neyra”, Consejo Superior de Investigaciones Científicas, 18100-Armilla, Granada, Spain*

*c. Structural Biology Laboratory, Department of Chemistry, University of York, Heslington, York YO10 5DD, UK*

\* Corresponding authors. Tel: +44 1382 386240. For correspondence on medicinal chemistry: Ian Gilbert [i.h.gilbert@dundee.ac.uk](mailto:i.h.gilbert@dundee.ac.uk). For correspondence on enzyme inhibition: Dolores González-Pacanowska [dgonzalez@ipb.csic.es](mailto:dgonzalez@ipb.csic.es). For correspondence on crystallography: Keith Wilson [keith.wilson@york.ac.uk](mailto:keith.wilson@york.ac.uk)

## Supporting Information

|                        |                |
|------------------------|----------------|
| <b>Biology</b>         | <b>Page 2</b>  |
| <b>Crystallography</b> | <b>Page 4</b>  |
| <b>In vitro DMPK</b>   | <b>Page 9</b>  |
| <b>Chemistry</b>       | <b>Page 11</b> |
| <b>References</b>      | <b>Page 41</b> |

## Biology

### Enzyme purification and enzyme assays

*Pf*TMPK purification and enzyme assays were performed as described previously.<sup>1</sup> The  $K_m$  of *Pf*TMPK for TMP is 11  $\mu$ M. Catalytic activity was determined in 50 mM Tris-HCl, pH 7.4, 50 mM KCl, 5 mM MgCl<sub>2</sub>, 0.2 mM NADH, 1 mM DTT, 1 mM phosphoenolpyruvate, 4 U pyruvate kinase, 4 U lactate dehydrogenase, 50  $\mu$ M TMP, 1 mM ATP and 1  $\mu$ g of purified recombinant *Pf*TMPK. In this coupled assay, TMP is first phosphorylated to TDP and the resulting ADP is phosphorylated to ATP using phosphoenolpyruvate as a phosphate donor in a reaction catalysed by pyruvate kinase. The pyruvate is then converted to lactate in a reaction catalyzed by lactate dehydrogenase which uses NADH to give NAD. This latter reaction is followed spectrophotometrically at 340 nm. Some of the active inhibitors were tested for inhibition of pyruvate kinase and lactate dehydrogenase. This assay was performed as above with ADP replacing TMP and with various concentrations of inhibitors. Inhibition constants for *Pf*TMPK were obtained using TMP as substrate and variable inhibitor concentrations. For each inhibitor five to ten concentrations (ranging from 0-200  $\mu$ M) were tested in duplicate to obtain IC<sub>50</sub> values using SigmaPlot hyperbolic or sigmoidal dose-response curves. The resulting values are the average of two independent experiments. The inhibition  $K_i$  values were obtained according to the equation.  $K_i = IC_{50} / (1 + [S] / K_m)$ , which relates the concentration of competitive inhibitor which inhibits activity by 50% (IC<sub>50</sub>) with the  $K_i$  value, where  $K_m$  is the Michaelis constant for inosine. If the IC<sub>50</sub> is not covered in the tested concentrations, then the  $K_i$  was calculated following the equation to get an average  $K_i$  constant.  $K_{i(av)} = ([I] / i - [I]) / (1 + [S] / K_m)$ ,  $i = 1 - v_i / v_0$ , where [I] is the inhibitor concentration, [S] is the substrate concentration,  $v_i$  is the steady state reaction rate with inhibitors and  $v_0$  is the steady state reaction rate without inhibitor.

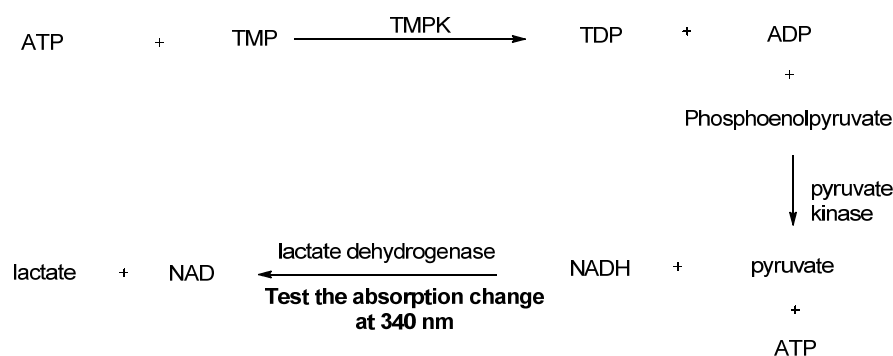

**Figure S1:** The coupled TMPK assay.

### Cell based assay

*In vitro* activity against the erythrocytic stages of *Plasmodium falciparum* was determined by using a SYBR-green assay.<sup>2</sup> The parasite *P. falciparum* 3D7 was cultured using standard methods, and synchronized using 5% sorbitol as previously described.<sup>3</sup> Compounds were dissolved in DMSO at 100 mM and added to 48 h post-synchronization parasite cultures incubated in RPMI 1640 medium with hypoxanthine (150  $\mu$ M), NaHCO<sub>3</sub> (0.2%), gentamycin (12.5  $\mu$ g/mL), Albumax (0.5%), human serum (2%) and washed human red cells O<sup>+</sup> at 5% haematocrit (0.3% parasitaemia). Chloroquine was used as standard drug. Experiments were carried out at least twice independently and the different concentrations were tested in duplicate. After 48 h of growth, 100  $\mu$ l of SYBR-green I (Molecular Probes) in lysis buffer (20 mM Tris-HCl pH 7.5, 5 mM EDTA, 0.008 % saponin, 0.08 % triton X-100 containing 0.2  $\mu$ l of SYBR-green/ml of lysis buffer) was added to each well, and mixed and after 1 h of incubation in the dark at RT, fluorescence was measured with excitation and emission wavelength bands centred at 485 and 530 nm. The percentage inhibition of each compound at each concentration was determined. EC<sub>50</sub> values were calculated from hyperbolic or sigmoidal dose-response curves using Sigmaplot 10.0. The EC<sub>50</sub> values are the means of two independent assays. For the cell viability assay, MRC5 cells were seeded at 2000 cells per well in a volume of 200  $\mu$ l of DMEM containing 10% FCS and allowed to adhere for 24 h prior to use. The MRC5 cells assay was performed as described.<sup>4</sup> EC<sub>50</sub> values represent the concentration of compounds reducing *P. falciparum* growth by 50%. CC<sub>50</sub> values stand for the concentration of compounds reducing MRC5 cells growth by 50%.

## Crystallography

### Crystallisation, data collection and data processing

Crystals of three different inhibitor complexes of *Pf*TMPK were obtained using hanging drop (**53**) and sitting drop (**28** and **30**) vapour diffusion with a 1:1 mixture of protein solution and reservoir solution in the drop (Table S1). The dimensions of the crystals of the complex with **53** were about  $100 \times 100 \times 150 \mu\text{m}^3$ , while those with **28** and **30** had a brick-like shape with dimensions about  $50 \times 50 \times 150 \mu\text{m}^3$  and  $100 \times 100 \times 300 \mu\text{m}^3$ , respectively. Prior to data collection, the crystals were vitrified at 120 K in a cryoprotectant solution. X-ray data sets for the three complexes were collected at the ESRF in Grenoble and processed with *MOSFLM*.<sup>5</sup> Other computations were made with the CCP4 suite unless otherwise stated.<sup>6</sup> The data collection and refinement parameters are summarised in Table S2.

**Table S1.** Crystallisation conditions for the three *Pf*TMPK inhibitor complexes.

| Complex                                    | <b>53</b>                                                                                                           | <b>30</b>                                                                                                 | <b>28</b>                                                                                                             |
|--------------------------------------------|---------------------------------------------------------------------------------------------------------------------|-----------------------------------------------------------------------------------------------------------|-----------------------------------------------------------------------------------------------------------------------|
| Protein solution at 10 mg ml <sup>-1</sup> | 50 mM Tris pH 8.5,<br>0.2 M NaCl,<br>2 mM compound <b>53</b><br>(5% DMSO)                                           | 50 mM Tris pH 8.5,<br>0.1 M NaCl,<br>2 mM compound <b>30</b><br>(5% DMSO)                                 | 50 mM Tris pH 8.5,<br>0.1 M NaCl,<br>2 mM compound <b>31</b><br>(5% DMSO)                                             |
| Reservoir solution                         | Optimisation of Index H4:<br>0.2 M tri-Ammonium Citrate<br>pH 7.0, 25% PEG3350                                      | Index D7:<br>0.1 M Bis-Tris pH 6.5,<br>25% PEG3350                                                        | Pact C9:<br>0.1 M Hepes pH 7.0,<br>0.2 M LiCl,<br>20% PEG6000                                                         |
| Cryo-protectant solution                   | 50 mM Tris pH 8.5,<br>0.1 M NaCl,<br>1 mM compound <b>53</b> ,<br>0.2 M tri-Ammonium Citrate<br>pH 7.0, 30% PEG3350 | 50 mM Tris pH 8.5,<br>0.1 M NaCl,<br>0.8 mM compound <b>30</b> ,<br>0.1 M Bis-Tris pH 6.5,<br>30% PEG3350 | 50 mM Tris pH 8.5,<br>0.1 M NaCl,<br>0.4 mM compound <b>30</b> ,<br>0.1 M Hepes pH 7.0,<br>0.2 M LiCl,<br>28% PEG6000 |

## SUPPORTING INFORMATION

**Table S2.** Data processing and refinement statistics for the three complexes.

| Protein complex                                                     | <b>53</b>                              | <b>30</b>                                                                   | <b>28</b>                                                                   |
|---------------------------------------------------------------------|----------------------------------------|-----------------------------------------------------------------------------|-----------------------------------------------------------------------------|
| PDB Code                                                            | 2YOF                                   | 2YOH                                                                        | 2YOG                                                                        |
| ESRF beamline                                                       | ID23-1                                 | ID14-2                                                                      | ID14-2                                                                      |
| Wavelength                                                          | 0.9760                                 | 0.9330                                                                      | 0.9330                                                                      |
| Resolution limits (Å) <sup>a</sup>                                  | 51.29 – 1.82<br>(1.92 – 1.82)          | 25.09 – 1.60<br>(1.69 – 1.60)                                               | 23.37 – 1.50<br>(1.58 – 1.50)                                               |
| Space Group                                                         | P3 <sub>1</sub> 21                     | P2 <sub>1</sub>                                                             | P2 <sub>1</sub>                                                             |
| Cell dimensions (Å)                                                 | <i>a</i> = 109.64<br><i>c</i> = 121.89 | <i>a</i> = 49.26<br><i>b</i> = 58.43<br><i>c</i> = 71.83<br>$\beta$ = 96.11 | <i>a</i> = 49.06<br><i>b</i> = 58.79<br><i>c</i> = 71.71<br>$\beta$ = 95.78 |
| No. unique reflections <sup>a</sup>                                 | 76207 (10991)                          | 53617 (7803)                                                                | 64980 (9435)                                                                |
| Completeness <sup>a</sup>                                           | 100.0 (100.0)                          | 100.0 (100.0)                                                               | 99.9 (100.0)                                                                |
| Multiplicity <sup>a</sup>                                           | 10.6 (10.0)                            | 3.7 (3.7)                                                                   | 3.5 (3.5)                                                                   |
| R-merge <sup>a</sup>                                                | 0.115 (0.977)                          | 0.071 (0.712)                                                               | 0.077 (0.803)                                                               |
| I / $\sigma$ (I) <sup>a</sup>                                       | 12.9 (2.2)                             | 11.7 (1.7)                                                                  | 9.2 (1.4)                                                                   |
| R-factor / R-free                                                   | 0.189 / 0.231                          | 0.162 / 0.219                                                               | 0.182 / 0.233                                                               |
| Rmsd bond lengths (Å)                                               | 0.020                                  | 0.021                                                                       | 0.016                                                                       |
| Rmsd angles (°)                                                     | 1.400                                  | 1.428                                                                       | 1.465                                                                       |
| Rmsd chiral volumes (Å <sup>3</sup> )                               | 0.099                                  | 0.105                                                                       | 0.102                                                                       |
| Ramachandran outliers (%)                                           | 0.86                                   | 1.10                                                                        | 1.16                                                                        |
| B <sub>average</sub> protein atoms (Å <sup>2</sup> )                | 28.0                                   | 21.9                                                                        | 20.8                                                                        |
| B <sub>average</sub> ligand atoms (Å <sup>2</sup> )                 | 33.4                                   | 21.6                                                                        | 22.5                                                                        |
| B <sub>average</sub> water molecules (Å <sup>2</sup> ) <sup>b</sup> | 37.5 (645)                             | 33.2 (439)                                                                  | 33.5 (434)                                                                  |

<sup>a</sup> Highest resolution shell statistics given in parentheses;<sup>b</sup> Number of molecules in parentheses.**Structure solution and refinement**

The structures of *Pf*TMPK complexed with **30** and **53** were solved by molecular replacement with *MOLREP* using unliganded *Pf*TMPK (PDB code 2WWF) as a search model. For **53** the space group was P3<sub>1</sub>21 with three molecules in the asymmetric unit, while for **30** the space group was P2<sub>1</sub> with two independent molecules. The complex of **28** was isomorphous to that of **30** which was

## SUPPORTING INFORMATION

therefore used as a starting model. Refinement was carried out using *REFMAC*.<sup>7</sup> 5% of the data were excluded for R-free calculations. Manual rebuilding was carried using *COOT*<sup>8</sup> and the inhibitor molecules were added to the model (Table S3). Dictionaries for all of the nucleotide ligands were made using *PRODRG*.<sup>9</sup>

**Table S3. Ligand binding in the structures of the three complexes.** The quality of the density for each ligand, and the degree of order in the N-terminal and active site loops of the enzymes are summarised.

| Ligand | Protein Chain | Active site                                                                                                                                                                                                                                            | N-terminal loop                                                               | Active site loop   |
|--------|---------------|--------------------------------------------------------------------------------------------------------------------------------------------------------------------------------------------------------------------------------------------------------|-------------------------------------------------------------------------------|--------------------|
| 53     | A             | The ligand has two alternative conformations and is positioned where the active site loop is in chain C.                                                                                                                                               | Ordered and closely packed against the ligand.                                | 141-149 disordered |
|        | B             | The best density for this ligand in the three chains. <b>53</b> is positioned where the active site loop is in chain C.                                                                                                                                | Present. Close distance to ligand.                                            | 143-149 disordered |
|        | C             | The ligand has two alternative conformations. There is no density for the aromatic ring, which appears to point in the opposite direction to that seen in chains in A & B. This is related to the ordering of the active site loop e.                  | Folded differently than in A & B, due to the presence of the active site loop | Present            |
| 30     | A             | The ligand is most highly ordered in this chain and interacts with the N-terminal loop. There is only low density for the NO <sub>2</sub> moiety                                                                                                       | Present                                                                       | 142-149 disordered |
|        | B             | Two alternative conformations, with no density for the ring in either. The N-terminal loop interacts with one of the two conformations, as in chain A. The NO <sub>2</sub> is stabilised by an interaction with Lys5 from a symmetry related molecule. | Present (Arg18 with low density)                                              | 143-150 disordered |
| 28     | A             | The ligand has well defined density.                                                                                                                                                                                                                   | Present (Arg18 with low density)                                              | 141-151 disordered |
|        | B             | Very well defined ligand density. There is a clear interaction of the CF <sub>3</sub> group with Arg47.                                                                                                                                                | Residues 17-20 disordered                                                     | 142-152 disordered |

The rmsd in C $\alpha$  positions is 0.52 (199), 0.48 (197) and 0.63 Å (195) when superposing the structures of Chains A of the **28**, **30** and **53** complexes respectively on that of the TMP-ADP complex (Figures S2 and S3). The numbers in brackets are the number of residues in equivalent positions, and vary slightly with the loop disorder.

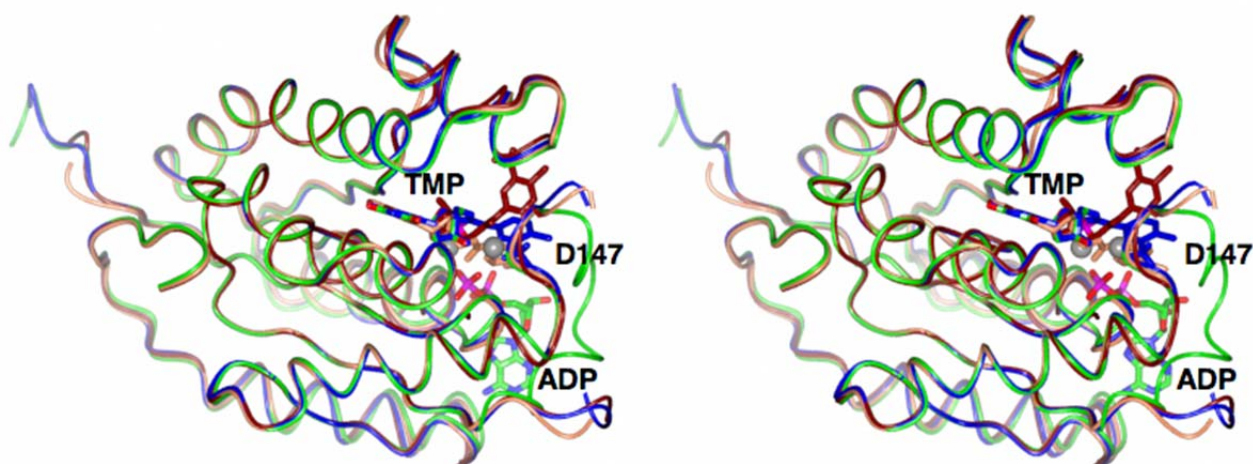

**Figure S1.** Stereo view of the superposition of three ligand complexes **53** (Chain B, blue), **30** (Chain A, coral) and **28** (Chain B, tan) on that of the TMP-ADP complex (green) determined previously (pdb: 1wwf). For the complexes the chain was selected in which the ligand was best ordered. The ADP and TMP are coloured by atom, the three ligands as for the parent chains. The two sodium atoms in the TMP-ADP complex are shown as spheres.

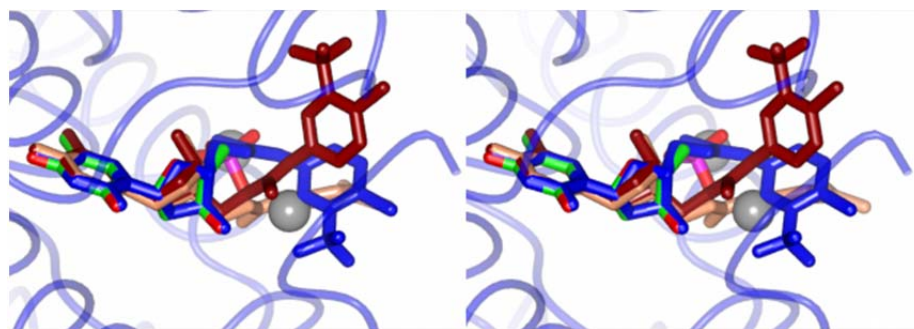

**Figure S2:** Close up of the superposition shown in Figure S1. This corresponds to the mono view in Figure 3A of the main text.

## SUPPORTING INFORMATION

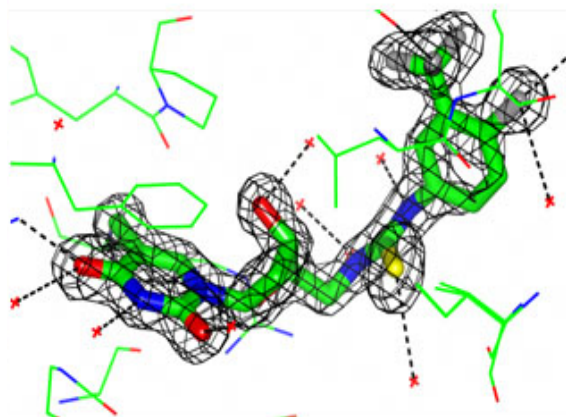

**Figure S3:** The electron density in the maximum likelihood weighted map around **28**. There is excellent density for essentially all the ligand, though at a lower level for the edge of the aromatic ring. The fluorine atoms are well defined. The side chains of the residues that contact the ligand are shown.



## ***In vitro* DMPK**

### *Intrinsic clearance ( $C_{Li}$ ) experiments*

Test compound (0.5  $\mu$ M) was incubated with female CD1 mouse liver microsomes (Xenotech LLC<sup>TM</sup>; 0.5 mg/ml 50 mM potassium phosphate buffer, pH7.4) and the reaction started with addition of excess NADPH (8 mg/ml 50 mM potassium phosphate buffer, pH7.4). Immediately, at time zero, then at 3, 6, 9, 15 and 30 minutes an aliquot (50  $\mu$ l) of the incubation mixture was removed and mixed with acetonitrile (100  $\mu$ l) to stop the reaction. Internal standard was added to all samples, the samples centrifuged to sediment precipitated protein and the plates then sealed prior to UPLCMSMS analysis using a Quattro Premier XE (Waters Corporation, USA).

XLfit (IDBS, UK) was used to calculate the exponential decay and consequently the rate constant (k) from the ratio of peak area of test compound to internal standard at each timepoint. The rate of intrinsic clearance ( $C_{Li}$ ) of each test compound was then calculated using the following calculation:

$$C_{Li} \text{ (ml/min/g liver)} = k \times V \times \text{Microsomal protein yield}$$

Where V (mL/mg protein) is the incubation volume/mg protein added and microsomal protein yield is taken as 52.5 mg protein/ g liver. Verapamil (0.5  $\mu$ M) was used as a positive control to confirm acceptable assay performance.

### *Plasma protein binding experiments*

In brief, a 96-well equilibrium dialysis apparatus was used to determine the free fraction in plasma for each compound (HT Dialysis LLC, Gales Ferry, CT). Membranes (12-14 kDa cut-off) were conditioned in deionised water for 60 min, followed by conditioning in 80:20 deionised water:ethanol for 20 min, and then rinsed in isotonic buffer before use. Female CD1 mouse plasma was removed from the freezer and allowed to thaw on the day of experiment. Thawed plasma was then centrifuged (Allegra X12-R, Beckman Coulter, USA), spiked with test compound (10  $\mu$ g/g), and 150  $\mu$ l aliquots (n = 6 replicate determinations) loaded into the 96-well equilibrium dialysis plate. Dialysis vs isotonic buffer (150  $\mu$ l) was carried out for 5 h in a temperature controlled incubator at *ca.* 37°C (Barworld Scientific Ltd, UK) using an orbital microplate shaker at 125 revolutions/minute (Barworld Scientific Ltd, UK). At the end of the incubation period, aliquots of plasma or buffer were transferred to micronic tubes (Micronic B.V., The Netherlands) and the

## SUPPORTING INFORMATION

composition in each tube balanced with control fluid, such that the volume of buffer to plasma is the same. Sample extraction was performed by the addition of 400  $\mu$ l of acetonitrile containing an appropriate internal standard. Samples were allowed to mix for 1 minute and then centrifuged at 3000 rpm in 96-well blocks for 15 min (Allegra X12-R, Beckman Coulter, USA). All samples were analysed by means of UPLC-MS/MS on a Quattro Premier XE Mass Spectrometer (Waters Corporation, USA). The unbound fraction was determined as the ratio of the peak area in buffer to that in plasma.

## Chemistry

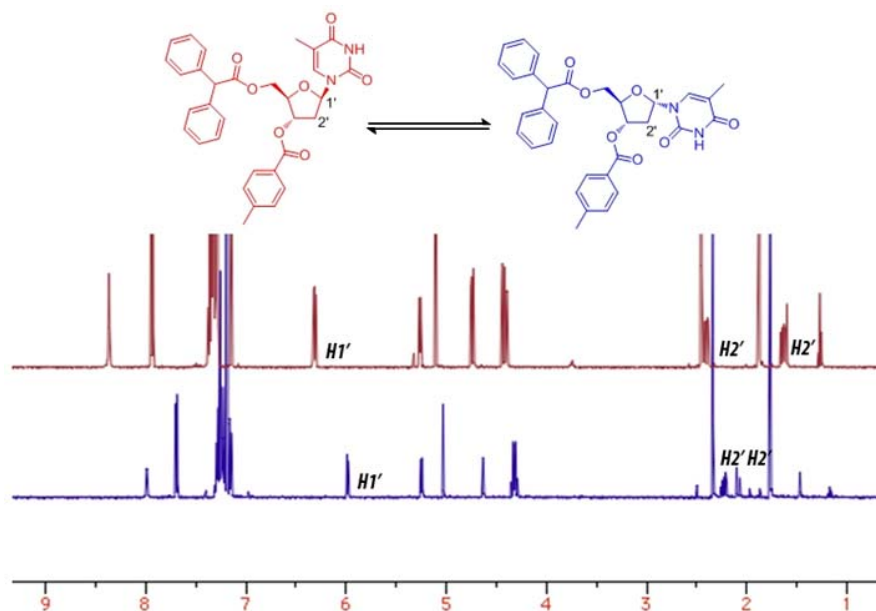

**Figure S4:** NMR spectra of compounds **3** and **4**. The diagram shows the chemical shifts of H1' and H2'.

**5'-O-diphenylacetyl- $\beta$ -thymidine (2):** To a solution of  $\beta$ -thymidine (1g, 4.38 mmol) in dry pyridine (32 ml) under Ar at 0°C, was added dropwise to a solution of 2, 2-diphenylacetyl chloride (1g, 4.38 mmol) dissolved in 3 ml DCM. The mixture was left under stirring for 1.5 h and the reaction was allowed to warm to room temperature. After that, water (50 ml) was added then extracted with DCM (2  $\times$  50 ml). The organic phase was washed with 3N HCl (50 ml, 50 ml) and with a saturated solution of NaHCO<sub>3</sub> (2  $\times$  50 ml) to neutralize. The organic layer was then dried with MgSO<sub>4</sub> and the solvent was evaporated. The residue was purified by chromatography using 2% MeOH/DCM to yield compound **2** 886 mg (50%) as a solid. <sup>1</sup>H-NMR (500MHz, CDCl<sub>3</sub>):  $\delta$  7.22-7.30 (m, 10H, *H*-Ph), 7.11 (s, 1H, *H*6), 6.15 (t, *J* = 5.96 Hz, 1H, *H*1'), 5.02 (s, 1H, *CH*-Ph), 4.47 (dd, *J*<sub>1</sub> = 12.21 Hz, *J*<sub>2</sub> = 4.84 Hz, 1H, *H*5'), 4.30 (dd, *J*<sub>1</sub> = 12.20 Hz, *J*<sub>2</sub> = 3.10 Hz, 1H, *H*5'), 4.12-4.17 (m, 2H, *H*3' and *H*4'), 2.20 (m, 1H, *H*2'), 1.82 (s, 3H, *H*7), 1.68 (m, 1H, *H*2'); <sup>13</sup>C-NMR (125MHz, CDCl<sub>3</sub>):  $\delta$  176.3 (*C*6'), 168.1 (*C*4), 154.4 (*C*2), 141.9 (*C*-Ph), 139.1 (*C*6), 132.7, 132.6, 132.4, 131.5, 131.4 (*C*-Ph), 114.9 (*C*5), 89.0 (*C*1'), 88.3 (*C*4'), 75.1 (*C*3'), 68.5 (*C*5'), 61.1 (*C*-C-

## SUPPORTING INFORMATION

Ph), 43.9 (*C2'*), 16.3 (*C7*); LCMS (ES<sup>+</sup>): *m/z* (%) 437 (100) [M+H]<sup>+</sup>; HRMS (ES<sup>+</sup>): calcd for C<sub>24</sub>H<sub>25</sub>N<sub>2</sub>O<sub>6</sub> [M+H]<sup>+</sup> 437.1707 *m/z*, found 437.1711 *m/z* (-0.91 ppm).

**3'-*O-p*-toluoyl-5'-*O*-diphenylacetyl-β-thymidine (3):** To a solution of **2** (1.143 g, 2.6 mmol) in dry pyridine/DCM (18 ml / 3 ml), was added dropwise a solution of *p*-toluoyl chloride (616 mg, 4 mmol) liquid. The mixture was left under Ar and stirring for 3 h. After this, water (50 ml) was added, then extracted with DCM (2×50 ml). The organic phase was washed with 3N HCl (2×50 ml), and then washed with saturated solution of NaHCO<sub>3</sub> (2×50 ml). The organic phase was then dried with MgSO<sub>4</sub> and the solvent was evaporated. The residue was purified by chromatography. The final product **3** was 0.8 g (55.6 %) as a solid. <sup>1</sup>H-NMR (500MHz, CDCl<sub>3</sub>): δ 8.36 (s, 1H, NH), 7.39 (d, *J* = 8.28 Hz, 2H, *H*-Ph), 7.27-7.37 (m, 10H, *H*-Ph), 7.14 (s, 1H, *H6*), 6.32 (dd, *J*<sub>1</sub> = 9.25 Hz, *J*<sub>2</sub> = 5.28Hz, 1H, *H1'*), 5.26 (d, *J* = 6.64 Hz, *H3'*), 5.11 (s, 1H, *CH*-Ph), 4.74 (dd, *J* = 12.13 Hz, *J* = 4.01 Hz, 1H, *H4'*), 4.39-4.43 (m, 2H, *H5'*), 2.45 (s, 3H, *CH*<sub>3</sub>), 2.40 (dd, *J*<sub>1</sub> = 14.28 Hz, *J*<sub>2</sub> = 6.47 Hz, 1H, *H2'*), 1.88 (s, 3H, *H7*), 1.64 (m, 1H, *H2'*); <sup>13</sup>C-NMR (125MHz, CDCl<sub>3</sub>): δ 171.9 (CO), 166.1 (CO), 163.0 (*C4*), 149.9 (*C2*), 144.7, 138.1, 129.8, 129.3, 128.9, 128.8, 128.5, 128.5, 127.7, 127.6, 126.3 (*C*-Ph), 134.6 (*C6*), 111.3 (*C5*), 84.8 (*C1'*), 82.5 (*C4'*), 74.7 (*C3'*), 64.5 (*C5'*), 57.4 (*C*-*C*-Ph), 37.2 (*C2'*), 21.7 (*CH*<sub>3</sub>), 12.6 (*C7*); LCMS (ES<sup>+</sup>): *m/z* (%) 555 (100) [M+H]<sup>+</sup>; HRMS (ES<sup>+</sup>): calcd for C<sub>32</sub>H<sub>31</sub>N<sub>2</sub>O<sub>7</sub> [M+H]<sup>+</sup> 555.2126 *m/z*, found 555.2104 *m/z* (4.00 ppm).

**3'-*O-p*-toluoyl-5'-*O*-diphenylacetyl-α-thymidine (4):** To a solution of **3** (440 mg, 0.8 mmol) in 2 ml dry CH<sub>3</sub>CN was added the freshly prepared solution containing H<sub>2</sub>SO<sub>4</sub> (1.66 mmol, 0.088 ml) and acetic anhydride (5.5 mmol, 0.519 ml) in 2 ml dry CH<sub>3</sub>CN. After 1.5-2 h, the mixture was quenched with saturated NaHCO<sub>3</sub> solution, and extracted with EtOAc for three times. The alpha-anomer was can be easily crystallized from the ethanol solution of the mixture, giving at least compound **4** α-anomer 160 mg (51%) as a solid. <sup>1</sup>H-NMR (500MHz, CDCl<sub>3</sub>): δ 7.99 (s, 1H, NH), 7.69 (d, *J* = 8.21 Hz, 2H, *H*-Ph), 7.14-7.30 (m, 8H, *H*-Ph and *H6*), 5.99 (dd, *J*<sub>1</sub> = 7.21 Hz, *J*<sub>2</sub> = 1.89 Hz, 1H, *H1'*), 5.25 (d, *J* = 6.48 Hz, 1H, *H3'*), 5.03 (s, 1H, *CH*-Ph), 4.63 (t, *J* = 3.60, 1H, *H4'*), 4.32 (m, 2H, *H5'*), 2.34 (s, 3H, *CH*<sub>3</sub>), 2.23 (m, 1H, *H2'*); 2.09 (d, *J* = 15.45 Hz, 1H, *H2'*), 1.77 (s, 3H, *CH*<sub>3</sub>); <sup>13</sup>C-NMR (125MHz, CDCl<sub>3</sub>): δ 171.9 (CO), 166.1 (CO), 163.5 (*C4*), 150.2 (*C2*), 144.6, 138.04, 138.02, 129.8, 129.3, 129.0, 128.8, 128.54, 128.5, 127.8, 127.6, 126.2 (*C*-Ph), 134.6 (*C6*), 111.4 (*C5*), 84.7 (*C1'*), 82.5 (*C4'*), 74.8 (*C3'*), 64.6 (*C5'*), 57.4 (*C*-*C*-Ph), 37.1 (*C2'*), 21.8 (*CH*<sub>3</sub>), 12.7 (*CH*<sub>3</sub>); LCMS (ES<sup>+</sup>): *m/z* (%) 555 (100) [M+H]<sup>+</sup>; HRMS (ES<sup>+</sup>): calcd for C<sub>32</sub>H<sub>31</sub>N<sub>2</sub>O<sub>7</sub> [M+H]<sup>+</sup> 555.2126 *m/z*, found 555.2112 *m/z* (2.41 ppm).

## SUPPORTING INFORMATION

**$\alpha$ -Thymidine (5):** Compound **4** (2mmol) was dissolved in a solution of 0.2 M NaOMe in 40 ml Methanol. The reaction was stirred at room temperature until the disappearance of the starting material (around 3 h) was observed by TLC. The solution was neutralized by Dowex ion exchanged resin (washed by methanol before use) to be pH 6.0. The resin was filtered and washed twice with methanol, water and some DCM too. The methanol and DCM was evaporated and the precipitation was formed and filtered to get rid of them. The water was evaporated to get the pure final product **5** 436 mg (90%) as a solid.  $^1\text{H-NMR}$  (500MHz,  $\text{D}_2\text{O}$ ):  $\delta$  8.32 (s, 1H, *NH*), 7.62 (s, 1H, *H6*), 6.04 (s, 1H, *H1'*), 4.26, 4.30 (s, 2H, *H3'* and *H4'*), 3.58 (d,  $J = 12.35$  Hz, *H5'*), 3.49 (d,  $J = 11.73$  Hz, *H5'*), 2.59 (m, 1H, *H2'*), 2.04 (d,  $J = 14.82$  Hz, *H2'*), 1.77 (s, 3H,  $\text{CH}_3$ );  $^{13}\text{C-NMR}$  (125MHz,  $\text{D}_2\text{O}$ ):  $\delta$  170.9 (*C4*), 166.7 (*C2*), 151.5 (*C6*), 138.0 (*C5*), 110.5 (*C1'*), 88.5 (*C4'*), 70.5 (*C3'*), 61.4 (*C5'*), 39.4 (*C2'*), 11.5 ( $\text{CH}_3$ ); LCMS ( $\text{ES}^+$ ):  $m/z$  (%) 243 (100)  $[\text{M}+\text{H}]^+$ , 485 (52)  $[2\text{M}+\text{H}]^+$ ; HRMS ( $\text{ES}^+$ ): calcd for  $\text{C}_{10}\text{H}_{15}\text{N}_2\text{O}_5$   $[\text{M}+\text{H}]^+$  243.0975  $m/z$ , found 243.0982  $m/z$  (-2.77 ppm).

**5'-*O*-methanesulfonyl- $\alpha$ -thymidine (6):** To a solution of  $\alpha$ -thymidine (484 mg, 2 mmol) in pyridine (8 ml) and DCM (1 ml) at  $-38$  °C (dry ice in ethanol), methanesulfonyl chloride (154  $\mu\text{l}$ , 2 mmol) in 1 ml dry DCM was added drop by drop. The reaction mixture was stirred 1 h at  $-38$  °C, then stirred another 2 h at  $0$  °C. The reaction was quenched by adding 10 ml  $\text{H}_2\text{O}$ . The product was transferred to a flask to evaporate the water, DCM and pyridine. Toluene was added to co-evaporate to remove pyridine. The residue was purified by column chromatography to get a pure product **6** 272.2 mg (42.5%) as a solid.  $^1\text{H-NMR}$  (500MHz, MeOD):  $\delta$  7.75 (s, 1H, *H6*), 6.19 (m, 1H, *H1'*), 4.45 (m, 1H, *H4'*), 4.35 (m, 1H, *H5'*), 4.26 (m, 1H, *H5'*), 4.19 (m, 1H, *H3'*), 3.27 (s, 3H,  $\text{CH}_3$ ), 2.67 (m, 1H, *H2'*), 2.06 (m, 1H, *H2'*), 1.86 (s, 3H,  $\text{CH}_3$ );  $^{13}\text{C-NMR}$  (125MHz, MeOD):  $\delta$  162.8 (*C4*), 152.4 (*C2*), 138.7 (*C6*), 111.1 (*C5*), 72.5 (*C1'*), 72.2 (*C4'*), 70.7 (*C3'*), 64.4 (*C5'*), 41.1 (*C2'*), 37.3 ( $\text{CH}_3$ ), 12.6 ( $\text{CH}_3$ ); LCMS ( $\text{ES}^+$ ):  $m/z$  (%) 321 (100)  $[\text{M}+\text{H}]^+$ ; HRMS ( $\text{ES}^+$ ): calcd for  $\text{C}_{11}\text{H}_{17}\text{N}_2\text{O}_7\text{S}_1$   $[\text{M}+\text{H}]^+$  321.0751  $m/z$ , found 321.0766  $m/z$  (-4.55 ppm).

**5'- azido-5'-deoxy- $\alpha$ -thymidine (7):** A solution of compound **6** (3 mmol) and  $\text{NaN}_3$  (6 mmol) in 30 ml dry DMF was heated to  $60$  °C overnight. The reaction mixture was evaporated *in vacuum* and can co-evaporate with ethanol and toluene (temperature not above  $60$  °C). Then the solution was cooled and get rid of the insoluble, this is the waste need to neutralize with 20%  $\text{NaNO}_2$  solution to pH 6. Then the soluble solution was co-evaporated with ethanol and toluene again. The solution was put to high vacuum to evaporate the left DMF overnight. The crude product was purified by column chromatography to yield compound **7** 344 mg (43.1 %) as a solid;  $^1\text{H-NMR}$  (500MHz, DMSO):  $\delta$  11.30 (s, 1H, *NH*), 7.76 (s, 1H, *H6*), 6.16 (m, 1H, *H1'*), 5.53 (d,  $J = 3.07$  Hz, 1H, *OH*),

## SUPPORTING INFORMATION

4.28 (m, 1H,  $H4'$ ), 4.17 (m, 1H,  $H3'$ ), 3.40 (m, 2H,  $H5'$ ), 2.61 (m, 1H,  $H2'$ ), 1.96 (m, 1H,  $H2'$ ), 1.79 (s, 1H,  $CH_3$ );  $^{13}C$ -NMR (125MHz, DMSO):  $\delta$  163.8 ( $C4$ ), 150.5 ( $C2$ ), 136.8 ( $C6$ ), 109.0 ( $C5$ ), 85.9 ( $C1'$ ), 84.7 ( $C4'$ ), 70.7 ( $C3'$ ), 51.5 ( $C5'$ ), 39.1 ( $C2'$ ), 12.3 ( $CH_3$ ); LCMS ( $ES^+$ ):  $m/z$  (%) 268 (100)  $[M+H]^+$ ; HRMS ( $ES^+$ ): calcd for  $C_{10}H_{14}N_5O_4$   $[M+H]^+$  268.1040  $m/z$ , found 268.1029  $m/z$  (3.99 ppm).

**5'-amino-5'-deoxy- $\alpha$ -thymidine (8):** A solution of azide **7** (515 mg, 2 mmol) in 50ml methanol was hydrogenated under atmospheric pressure for 3 h in the presence of 10% Pd/C (100 mg, 5%mol). After 3 h, TLC checked the disappearance of compound **7**. Then the catalyst was removed by filtration through celite and the filtrate was evaporated to yield pure compound **8** 457 mg (94.8 %) as a solid.  $^1H$ -NMR (500MHz, DMSO):  $\delta$  7.74 (s, 1H,  $H6$ ), 6.09 (m, 1H,  $H1'$ ), 5.31 (s, 1H,  $OH$ ), 4.19 (m, 1H,  $H4'$ ), 4.07 (m, 1H,  $H3'$ ), 3.35 (m, 1H,  $H5'$ ), 3.17 (s, 1H,  $H5'$ ), 2.54 (m, 1H,  $H2'$ ), 1.90 (m, 1H,  $H2'$ ), 1.78 (s, 3H,  $CH_3$ ); LCMS ( $ES^+$ ):  $m/z$  (%) 242 (100)  $[M+H]^+$ ; HRMS ( $ES^+$ ): calcd for  $C_{10}H_{16}N_3O_4$   $[M+H]^+$  242.1135  $m/z$ , found 242.1132  $m/z$  (1.09 ppm).

### General Procedure for compounds **9** - **30**

For the synthesis of compounds **9** - **30**, compound of amine **8** (1eq.) was dissolved in DMF at 0 °C. The coupling reagents (1.1 eq.) were added and the reaction mixture was allowed to stir at room temperature for 3 h. After the completion of the reaction, the reaction mixture was evaporated to dry (ethanol and toluene were used to co-evaporate) and the residue was purified by column chromatography to yield the compounds **9** - **30** as a solid with the yields ranging from 45 % to 89 %.

**5'-(4-nitrophenyl)sulfonamido-5'-deoxy- $\alpha$ -thymidine (9):** 4-Nitrobenzolsulfonyl chloride reacted with amine **8** to yield compound **9** as a solid;  $^1H$ -NMR (500MHz, DMSO):  $\delta$  11.23 (s, 1H,  $NH$ ), 8.41 (d,  $J = 8.7$  Hz, 2H,  $H$ -Ph), 8.31 (s, 1H,  $NH$ ), 8.05 (d,  $J = 8.7$  Hz, 2H,  $H$ -Ph), 7.66 (s, 1H,  $H6$ ), 5.97 (qt,  $J = 3.81$  Hz, 1H,  $H1'$ ), 5.47 (s, 1H,  $OH$ ), 4.08-4.14 (m, 2H,  $H3'$  and  $H4'$ ), 2.99 (qt,  $J = 6.16$  Hz, 1H,  $H5'$ ), 2.88 (qt,  $J = 6.76$  Hz, 1H,  $H5'$ ), 2.54 (d,  $J = 6.15$  Hz, 1H,  $H2'$ ), 1.85-1.89 (m, 1H,  $H2'$ ), 1.76 (s, 3H,  $CH_3$ );  $^{13}C$ -NMR (125MHz, DMSO):  $\delta$  163.8 ( $C4$ ), 150.4, 149.5 ( $C$ -Ph), 146.3 ( $C2$ ), 136.7 ( $C6$ ), 128.0, 124.5 ( $C$ -Ph), 108.9 ( $C5$ ), 85.9 ( $C1'$ ), 84.5 ( $C4'$ ), 70.6 ( $C3'$ ), 44.4 ( $C5'$ ), 39.0 ( $C2'$ ), 12.3 ( $CH_3$ ); LCMS ( $ES^+$ ):  $m/z$  (%) 449 (100)  $[M+Na]^+$ ; HRMS ( $ES^+$ ): calcd for  $C_{16}H_{19}N_4O_8S_1$   $[M+H]^+$  427.0918  $m/z$ , found 427.0923  $m/z$  (-1.17 ppm).

**5'-(2-naphthyl)sulfonamido-5'-deoxy- $\alpha$ -thymidine (10):** 2-Naphthalenesulfonyl chloride reacted with amine **8** to yield compound **10** as a solid;  $^1H$ -NMR (500MHz, DMSO):  $\delta$  11.23 (s, 1H,  $NH$ ),

## SUPPORTING INFORMATION

8.44 (s, 1H, NH), 8.13-8.17 (m, 2H, H-Ph), 8.04 (d,  $J = 7.85$  Hz, 2H, H-Ph), 7.84 (qt,  $J = 3.40$  Hz, 1H, H-Ph), 7.66-7.72 (m, 3H, H6, H-Ph and H-Ph), 6.07 (qt,  $J = 3.17$  Hz, 1H, HI'), 5.45 (s, 1H, OH), 4.12-4.17 (m, 2H, H3' and H4'), 2.91 (qt,  $J = 6.23$  Hz, 1H, H5'), 2.83 (qt,  $J = 6.61$  Hz, 1H, H5'), 2.53-2.56 (m, 1H, H2'), 1.85-1.89 (m, 1H, H2'), 1.78 (s, 3H, CH<sub>3</sub>); <sup>13</sup>C-NMR (125MHz, DMSO):  $\delta$  163.8 (C4), 150.4 (C2), 137.5 (C6), 136.8, 134.1, 131.7, 129.3, 129.1, 128.7, 127.8, 127.5, 127.3, 122.2 (C-Ph), 108.8 (C5), 86.3 (C1'), 84.7 (C4'), 70.7 (C3'), 44.5 (C5'), 39.0 (C2'), 12.3 (CH<sub>3</sub>); LCMS (ES<sup>+</sup>): m/z (%) 432 (74) [M+H]<sup>+</sup>, 306 (100) [M+C<sub>10</sub>H<sub>7</sub>]<sup>+</sup>; HRMS (ES<sup>+</sup>): calcd for C<sub>20</sub>H<sub>22</sub>N<sub>3</sub>O<sub>6</sub>S<sub>1</sub> [M+H]<sup>+</sup> 432.1224 m/z, found 432.1227 m/z (-0.83 ppm).

**5'-(2-naphthyl)amido-5'-deoxy- $\alpha$ -thymidine (11):** 2-Naphthoyl chloride reacted with amine **8** to yield compound **11** as a solid; <sup>1</sup>H-NMR (500MHz, DMSO):  $\delta$  11.28 (s, 1H, NH), 8.82 (t,  $J = 5.80$  Hz, 1H, NH), 7.94-8.04 (m, 5H, H-Ph), 7.79 (s, 1H, H6), 7.58-7.65 (m, 2H, H-Ph), 6.22 (qt,  $J = 3.55$  Hz, 1H, HI'), 5.49 (s, 1H, OH), 4.36 (t,  $J = 6.35$  Hz, 1H, H3'), 4.30 (d,  $J = 5.75$  Hz, 1H, H4'), 3.41 (m, 2H, H5'), 2.60-2.66 (m, 1H, H2'), 1.90-1.96 (m, 1H, H2'), 1.77 (s, 3H, CH<sub>3</sub>); <sup>13</sup>C-NMR (125MHz, DMSO):  $\delta$  166.5 (CO), 163.8 (C4), 150.9 (C2), 137.0 (C6), 134.1, 132.1, 131.5, 129.2, 128.8, 127.9, 127.6, 127.5, 126.7, 124.1 (C-Ph), 108.6 (C5), 86.6 (C1'), 84.8 (C4'), 71.0 (C3'), 41.4 (C5'), 39.0 (C2'), 12.4 (CH<sub>3</sub>); LCMS (ES<sup>+</sup>): m/z (%) 396 (100) [M+H]<sup>+</sup>; HRMS (ES<sup>+</sup>): calcd for C<sub>21</sub>H<sub>22</sub>N<sub>3</sub>O<sub>5</sub> [M+H]<sup>+</sup> 396.1554 m/z, found 396.1552 m/z (0.37 ppm).

**5'-(4-nitrophenyl)amido-5'-deoxy- $\alpha$ -thymidine (12):** 4-Nitrobenzoyl chloride reacted with amine **8** to yield compound **12** as a solid; <sup>1</sup>H-NMR (500MHz, DMSO):  $\delta$  11.28 (s, 1H, NH), 8.99 (t,  $J = 5.77$  Hz, 1H, NH), 8.33 (d,  $J = 8.70$  Hz, 2H, H-Ph), 8.09 (d,  $J = 8.70$  Hz, 2H, H-Ph), 7.77 (s, 1H, H6), 6.19 (qt,  $J = 3.58$  Hz, 1H, HI'), 5.48 (d,  $J = 3.00$  Hz, 1H, OH), 4.32 (t,  $J = 6.25$  Hz, 1H, H3'), 4.25 (d,  $J = 2.6$  Hz, 1H, H4'), 3.35 (m, 2H, H5'), 2.58-2.63 (m, 1H, H2'), 1.93 (d,  $J = 14.45$ Hz, 1H, H2'), 1.77 (s, 3H, CH<sub>3</sub>); <sup>13</sup>C-NMR (125MHz, DMSO):  $\delta$  164.9 (CO), 163.8 (C4), 150.5 (C2), 149.6, 149.0, 139.8 (C-Ph), 137.0 (C6), 128.8, 123.5 (C-Ph), 108.7 (C5), 86.7 (C1'), 84.7 (C4'), 71.0 (C3'), 41.5 (C5'), 39.0 (C2'), 12.4 (CH<sub>3</sub>); LCMS (ES<sup>+</sup>): m/z (%) 391 (100) [M+H]<sup>+</sup>; HRMS (ES<sup>+</sup>): calcd for C<sub>17</sub>H<sub>19</sub>N<sub>4</sub>O<sub>7</sub> [M+H]<sup>+</sup> 391.1248 m/z, found 391.1255 m/z (-1.71 ppm).

**5'-(4-nitrobenzyl)amino-5'-deoxy- $\alpha$ -thymidine (13):** 4-Nitrobenzyl chloride reacted with amine **8** to yield compound **13** as a solid; <sup>1</sup>H-NMR (500MHz, DMSO):  $\delta$  11.27 (s, 1H, NH), 8.19 (d,  $J = 8.60$  Hz, 2H, H-Ph), 7.74 (s, 1H, H6), 7.62 (d,  $J = 8.55$  Hz, 2H, H-Ph), 6.10 (qt,  $J = 3.63$  Hz, 1H, HI'), 5.35 (d,  $J = 2.95$  Hz, 1H, OH), 4.18-4.22 (m, 1H, H3'), 4.12-4.13 (m, 1H, H4'), 3.85 (s, 2H, CH<sub>2</sub>), 2.54-2.58 (m, 3H, H5', H5' and H2'), 1.88-1.92 (m, 1H, H2'), 1.78 (s, 3H, CH<sub>3</sub>); <sup>13</sup>C-NMR

## SUPPORTING INFORMATION

(125MHz, DMSO):  $\delta$  163.9 (C4), 150.5 (C2), 146.3, 128.8, 123.3 (C-Ph), 136.9 (C6), 108.6 (C5), 87.3 (C1'), 84.8 (C4'), 71.3 (C3'), 52.1 (C5'), 50.4 (CH<sub>2</sub>), 39.0 (C2'), 12.4 (CH<sub>3</sub>); LCMS (ES<sup>+</sup>): m/z (%) 377 (100) [M+H]<sup>+</sup>; HRMS (ES<sup>+</sup>): calcd for C<sub>17</sub>H<sub>21</sub>N<sub>4</sub>O<sub>6</sub> [M+H]<sup>+</sup> 377.1456 m/z, found 377.1469 m/z (-3.64 ppm).

***N*-(5'-deoxy- $\alpha$ -thymidin-5'-yl)-*N'*-(carboethoxyethyl)urea (14):** Ethyl 3-isocyanatopropanoate reacted with amine **8** to yield compound **14** as a solid; <sup>1</sup>H-NMR (500MHz, DMSO):  $\delta$  11.22 (s, 1H, NH), 7.75 (d,  $J$  = 0.95 Hz, 1H, H6), 6.13 (qt,  $J$  = 3.66 Hz, 1H, H1'), 6.07 (t,  $J$  = 5.87 Hz, 1H, NH), 6.03 (t,  $J$  = 5.85 Hz, 1H, NH), 5.36 (s, 1H, OH), 4.11-4.13 (m, 2H, H4' and H3'), 4.04-4.08 (m, 2H, CH<sub>2</sub>), 3.23 (qt,  $J$  = 6.3 Hz, 2H, CH<sub>2</sub>), 3.01-3.14 (m, 2H, H5'), 2.50-2.53 (m, 3H, CH<sub>2</sub> and H2'), 2.41 (t,  $J$  = 6.5 Hz, 2H, CH<sub>2</sub>), 1.88-1.91 (m, 1H, H2'), 1.78 (s, 1H, CH<sub>3</sub>), 1.19 (t,  $J$  = 7.1 Hz, 3H, CH<sub>3</sub>); <sup>13</sup>C-NMR (125MHz, DMSO):  $\delta$  171.7 (CO), 163.8 (C4), 157.8 (CO), 150.5 (C2), 136.9 (C6), 108.7 (C5), 87.4 (C1'), 84.8 (C4'), 70.8 (C3'), 59.8 (C5'), 41.3 (CH<sub>2</sub>), 39.0 (C2'), 35.3 (CH<sub>2</sub>), 34.9 (CH<sub>2</sub>), 14.1 (CH<sub>3</sub>), 12.3 (CH<sub>3</sub>); LCMS (ES<sup>+</sup>): m/z (%) 385 (100) [M+H]<sup>+</sup>; HRMS (ES<sup>+</sup>): calcd for C<sub>16</sub>H<sub>25</sub>N<sub>4</sub>O<sub>7</sub> [M+H]<sup>+</sup> 385.1718 m/z, found 385.1723 m/z (-1.31 ppm).

***N*-(5'-deoxy- $\alpha$ -thymidin-5'-yl)-*N'*-benzylurea (15):** Benzyl isocyanate reacted with amine **8** to yield compound **15** as a solid; <sup>1</sup>H-NMR (500MHz, DMSO):  $\delta$  11.27 (s, 1H, NH), 7.76 (d,  $J$  = 1.15 Hz, 1H, H6), 7.29-7.32, 7.20-7.25 (m, 5H, H-Ph), 6.44 (t,  $J$  = 6.00 Hz, 1H, NH), 6.15 (qt,  $J$  = 3.68 Hz, 1H, H1'), 6.09 (t,  $J$  = 5.95 Hz, 1H, NH), 5.41 (d,  $J$  = 2.90 Hz, 1H, OH), 4.21 (d,  $J$  = 6.00 Hz, 2H, H3' and H4'), 4.11-4.16 (m, 2H, CH<sub>2</sub>), 3.14-3.19, 3.05-3.10 (m, 2H, H5'), 2.52-2.56 (m, 1H, H2'), 1.89-1.93 (m, 1H, H2'), 1.78 (s, 3H, CH<sub>3</sub>); <sup>13</sup>C-NMR (125MHz, DMSO):  $\delta$  163.8 (C4), 158.0 (CO), 150.5 (C2), 137.0 (C6), 140.8, 128.2, 127.0, 126.5 (C-Ph), 108.7 (C5), 87.4 (C1'), 84.7 (C4'), 70.8 (C3'), 42.9 (CH<sub>2</sub>), 41.4 (C5'), 39.0 (C2'), 12.4 (CH<sub>3</sub>); LCMS (ES<sup>+</sup>): m/z (%) 375 (100) [M+H]<sup>+</sup>; HRMS (ES<sup>+</sup>): calcd for C<sub>18</sub>H<sub>23</sub>N<sub>4</sub>O<sub>5</sub> [M+H]<sup>+</sup> 375.1663 m/z, found 375.1654 m/z (2.26 ppm).

***N*-(5'-deoxy- $\alpha$ -thymidin-5'-yl)-*N'*-(3-pyridyl)urea (16):** Pyridine 3-isocyanate reacted with amine **8** to yield compound **16** as a solid; <sup>1</sup>H-NMR (500MHz, DMSO):  $\delta$  11.24 (s, 1H, NH), 8.75 (s, 1H, NH), 8.53 (d,  $J$  = 2.4 Hz, 1H, H-Ph), 8.12 (d,  $J$  = 5.6 Hz, 1H, H-Ph), 7.87-7.89 (m, 1H, H-Ph), 7.77 (s, 2H, H-Ph), 7.25 (qt,  $J$  = 4.3 Hz, 1H, H6), 6.42 (t,  $J$  = 5.75 Hz, 1H, NH), 6.18 (qt,  $J$  = 3.71 Hz, 1H, H1'), 5.43 (d,  $J$  = 3.2 Hz, 1H, OH), 4.17-4.22 (m, 2H, H3' and H4'), 3.24-3.29 (m, 1H, H5'), 3.11-3.18 (m, 1H, H5'), 2.56-2.61 (m, 1H, H2'), 1.92-1.97 (m, 1H, H2'), 1.78 (s, 3H, CH<sub>3</sub>); <sup>13</sup>C-NMR (125MHz, DMSO):  $\delta$  163.8 (C4), 155.1 (CO), 150.5 (C2), 142.2 (CO), 139.5, 173.0, 136.9,



## SUPPORTING INFORMATION

124.4, 123.8 (C-Ph), 108.8 (C5), 86.7 (C1'), 84.7 (C4'), 70.9 (C3'), 41.1 (C5'), 39.0 (C2'), 12.3 (CH<sub>3</sub>); LCMS (ES<sup>+</sup>): *m/z* (%) 362 (100) [M+H]<sup>+</sup>; HRMS (ES<sup>+</sup>): calcd for C<sub>16</sub>H<sub>20</sub>N<sub>5</sub>O<sub>5</sub> [M+H]<sup>+</sup> 362.1459 *m/z*, found 362.1460 *m/z* (-0.34 ppm).

***N*-(5'-deoxy- $\alpha$ -thymidin-5'-yl)-*N'*-phenylurea (17):** Phenyl isocyanate reacted with amine **8** to yield compound **17** as a solid; <sup>1</sup>H-NMR (500MHz, DMSO):  $\delta$  11.24 (s, 1H, NH), 8.52 (s, 1H, NH), 7.77 (d, *J* = 1.20 Hz, 1H, H6), 7.37-7.39 (m, 2H, H-Ph), 7.20-7.24 (m, 2H, H-Ph), 6.88-6.91 (m, 1H, H-Ph), 6.25 (t, *J* = 5.85 Hz, 1H, NH), 6.19 (qt, *J* = 3.75 Hz, 1H, H1'), 5.43 (d, *J* = 3.25 Hz, 1H, OH), 4.17-4.21 (m, 2H, H3' and H4'), 3.24-3.29, 3.10-3.15 (m, 2H, H5'), 2.57-2.61 (m, 1H, H2'), 1.92-1.96 (m, 1H, H2'), 1.78 (s, 3H, CH<sub>3</sub>); <sup>13</sup>C-NMR (125 MHz, DMSO):  $\delta$  163.8 (C4), 155.2 (CO), 150.5 (C2), 136.9 (C6), 140.3, 128.6, 121.1, 117.6 (C-Ph), 108.8 (C5'), 86.9 (C1'), 84.7 (C4'), 70.9 (C3'), 56.0 (C5'), 41.0 (C2'), 12.3 (CH<sub>3</sub>); LCMS (ES<sup>+</sup>): *m/z* (%) 361 (100) [M+H]<sup>+</sup>; HRMS (ES<sup>+</sup>): calcd for C<sub>17</sub>H<sub>21</sub>N<sub>4</sub>O<sub>5</sub> [M+H]<sup>+</sup> 361.1506 *m/z*, found 361.1496 *m/z* (2.85 ppm).

***N*-(5'-deoxy- $\alpha$ -thymidin-5'-yl)-*N'*-(2-chlorophenyl)urea (18):** 2-Chlorophenyl isocyanate reacted with amine **8** to yield compound **18** as a solid; <sup>1</sup>H-NMR (500MHz, DMSO):  $\delta$  11.29 (s, 1H, NH), 8.16 (s, 1H, NH), 7.79 (d, *J* = 1.2 Hz, H6), 7.39 (qt, *J* = 3.16 Hz, 1H, H-Ph), 7.17-7.26 (m, 2H, H-Ph), 6.94-6.97 (m, 1H, H-Ph), 6.20 (qt, *J* = 3.78 Hz, 1H, H1'), 5.48 (d, *J* = 3.30 Hz, 1H, OH), 4.15-4.21 (m, 2H, H3' and H4'), 3.28-3.33 (m, 1H, H5'), 3.12-3.17 (m, 1H, H5'), 2.56-2.62 (m, 1H, H2'), 1.93-1.97 (m, 1H, H2'), 1.79 (s, 3H, CH<sub>3</sub>); <sup>13</sup>C-NMR (125MHz, DMSO):  $\delta$  163.8 (C4), 154.8 (CO), 150.5 (C2), 136.6 (C6), 136.9, 129.1, 127.4, 122.5, 121.1, 120.8 (C-Ph), 108.9 (C5), 86.7 (C1'), 84.6 (C4'), 70.9 (C3'), 41.1 (C5'), 39.0 (C2'), 12.3 (CH<sub>3</sub>); LCMS (ES<sup>+</sup>): *m/z* (%) 395 (100) [M+H]<sup>+</sup>; HRMS (ES<sup>+</sup>): calcd for C<sub>17</sub>H<sub>20</sub>Cl<sub>1</sub>N<sub>4</sub>O<sub>5</sub> [M+H]<sup>+</sup> 395.1117 *m/z*, found 395.1112 *m/z* (1.13 ppm).

***N*-(5'-deoxy- $\alpha$ -thymidin-5'-yl)-*N'*-(3-chlorophenyl)urea (19):** 3-Chlorophenyl isocyanate reacted with amine **8** to yield compound **19** as a solid; <sup>1</sup>H-NMR (500MHz, DMSO):  $\delta$  11.25 (s, 1H, NH), 8.77 (s, 1H, NH), 7.77 (d, *J* = 1.00 Hz, 1H, H6), 7.67 (t, *J* = 2.00 Hz, 1H, H-Ph), 7.16-7.26 (m, 2H, H-Ph), 6.93-6.95 (m, 1H, H-Ph), 6.35 (t, *J* = 5.77 Hz, 1H, NH), 6.18 (qt, *J* = 3.75 Hz, 1H, H1'), 5.43 (d, *J* = 3.25 Hz, 1H, OH), 4.16-4.21 (m, 2H, H3' and H4'), 3.23-3.28 (m, 1H, H5'), 3.09-3.15 (m, 1H, H5'), 2.55-2.61 (m, 1H, H2'), 1.92-1.96 (m, 1H, H2'), 1.78 (s, 3H, CH<sub>3</sub>); <sup>13</sup>C-NMR (125MHz, DMSO):  $\delta$  163.8 (C4), 154.9 (CO), 150.5 (C2), 136.9 (C6), 141.9, 133.1, 130.2, 120.7, 116.9, 116.0 (C-Ph), 108.8 (C5), 86.7 (C1'), 84.6 (C4'), 70.9 (C3'), 41.0 (C5'), 39.0 (C2'), 12.3

## SUPPORTING INFORMATION

(CH<sub>3</sub>); LCMS (ES<sup>+</sup>): *m/z* (%) 395 (100) [M+H]<sup>+</sup>; HRMS (ES<sup>+</sup>): calcd for C<sub>17</sub>H<sub>20</sub>Cl<sub>1</sub>N<sub>4</sub>O<sub>5</sub> [M+H]<sup>+</sup> 395.1117 *m/z*, found 395.1108 *m/z* (2.21 ppm).

***N*-(5'-deoxy- $\alpha$ -thymidin-5'-yl)-*N'*-(4-chlorophenyl)urea (20)<sup>10</sup>**: 4-Chlorophenyl isocyanate reacted with amine **8** to yield compound **20** as a solid; <sup>1</sup>H-NMR (500MHz, DMSO):  $\delta$  11.28 (s, 1H, NH), 8.71 (s, 1H, NH), 7.77 (d, *J* = 1.10 Hz, 1H, *H*<sub>6</sub>), 7.40-7.43 (m, 2H, *H*-Ph), 7.25-7.28 (m, 2H, *H*-Ph), 6.31 (t, *J* = 5.82 Hz, 1H, NH), 6.18 (qt, *J* = 3.75 Hz, 1H, *H*<sub>1'</sub>), 5.45 (d, *J* = 3.25 Hz, 1H, OH), 4.15-4.21 (m, 2H, *H*<sub>3'</sub> and *H*<sub>4'</sub>), 3.23-3.28 (m, 1H, *H*<sub>5'</sub>), 3.08-3.14 (m, 1H, *H*<sub>5'</sub>), 2.55-2.60 (m, 1H, *H*<sub>2'</sub>), 1.92-1.96 (m, 1H, *H*<sub>2'</sub>), 1.78 (s, 3H, CH<sub>3</sub>); <sup>13</sup>C-NMR (125MHz, DMSO):  $\delta$  163.8 (*C*<sub>4</sub>), 155.0 (*C*<sub>O</sub>), 150.5 (*C*<sub>2</sub>), 139.3 (*C*-Ph), 136.9 (*C*<sub>6</sub>), 128.5, 124.5, 119.0 (*C*-Ph), 108.8 (*C*<sub>5</sub>), 86.7 (*C*<sub>1'</sub>), 84.6 (*C*<sub>4'</sub>), 70.8 (*C*<sub>3'</sub>), 48.6 (*C*<sub>5'</sub>), 41.0 (*C*<sub>2'</sub>), 12.3 (CH<sub>3</sub>); LCMS (ES<sup>+</sup>): *m/z* (%) 395 (100) [M+H]<sup>+</sup>; HRMS (ES<sup>+</sup>): calcd for C<sub>17</sub>H<sub>20</sub>Cl<sub>1</sub>N<sub>4</sub>O<sub>5</sub> [M+H]<sup>+</sup> 395.1117 *m/z*, found 395.1115 *m/z* (0.47 ppm).

***N*-(5'-deoxy- $\alpha$ -thymidin-5'-yl)-*N'*-(4-chlorophenyl)thiourea (21)**: 4-Chlorophenyl isothiocyanate reacted with amine **8** to yield compound **21** as a solid; <sup>1</sup>H-NMR (500MHz, DMSO):  $\delta$  11.26 (s, 1H, NH), 9.71 (s, 1H, NH), 7.86 (s, 1H, NH), 7.79 (d, *J* = 1.20 Hz, 1H, *H*<sub>6</sub>), 7.48-7.51, 7.35-7.38 (m, 4H, *H*-Ph), 6.21 (qt, *J* = 3.73 Hz, 1H, *H*<sub>1'</sub>), 5.48 (d, *J* = 3.35 Hz, 1H, OH), 4.34-4.37 (m, 1H, *H*<sub>3'</sub>), 4.22-4.25 (m, 1H, *H*<sub>4'</sub>), 3.67-3.69, 3.48-3.53 (m, 2H, *H*<sub>5'</sub>), 2.57-2.63 (m, 1H, *H*<sub>2'</sub>), 1.92-1.96 (m, 1H, *H*<sub>2'</sub>), 1.79 (s, 3H, CH<sub>3</sub>); <sup>13</sup>C-NMR (125MHz, DMSO):  $\delta$  180.8 (*C*<sub>S</sub>), 163.8 (*C*<sub>4</sub>), 150.5 (*C*<sub>2</sub>), 136.9 (*C*<sub>6</sub>), 128.4, 124.6 (*C*-Ph), 108.8 (*C*<sub>5</sub>), 85.7 (*C*<sub>1'</sub>), 84.6 (*C*<sub>4'</sub>), 70.9 (*C*<sub>3'</sub>), 45.5 (*C*<sub>5'</sub>), 39.0 (*C*<sub>2'</sub>), 12.2 (CH<sub>3</sub>); LCMS (ES<sup>+</sup>): *m/z* (%) 411 (100) [M+H]<sup>+</sup>; HRMS (ES<sup>+</sup>): calcd for C<sub>17</sub>H<sub>20</sub>Cl<sub>1</sub>N<sub>4</sub>O<sub>4</sub>S<sub>1</sub> [M+H]<sup>+</sup> 411.0888 *m/z*, found 411.0883 *m/z* (1.23 ppm).

***N*-(5'-deoxy- $\alpha$ -thymidin-5'-yl)-*N'*-(4-bromophenyl)urea (22)**: 4-Bromophenyl isocyanate reacted with amine **8** to yield compound **22** as a solid; <sup>1</sup>H-NMR (500MHz, DMSO):  $\delta$  11.25 (s, 1H, NH), 8.69 (s, 1H, NH), 7.77 (d, *J* = 1.15 Hz, 1H, *H*<sub>6</sub>), 7.36-7.41 (m, 4H, *H*-Ph), 6.30 (t, *J* = 5.82 Hz, 1H, NH), 6.18 (qt, *J* = 3.75 Hz, 1H, *H*<sub>1'</sub>), 5.43 (d, *J* = 3.35 Hz, 1H, OH), 4.15-4.21 (m, 2H, *H*<sub>3'</sub> and *H*<sub>4'</sub>), 3.23-3.28, 3.09-3.14 (m, 2H, *H*<sub>5'</sub>), 2.55-2.60 (m, 1H, *H*<sub>2'</sub>), 1.92-1.96 (m, 1H, *H*<sub>2'</sub>), 1.78 (s, 3H, CH<sub>3</sub>); <sup>13</sup>C-NMR (125MHz, DMSO):  $\delta$  163.8 (*C*<sub>4</sub>), 155.0 (*C*<sub>O</sub>), 150.5 (*C*<sub>2</sub>), 136.9 (*C*<sub>6</sub>), 139.8, 131.4, 119.5, 112.4 (*C*-Ph), 108.8 (*C*<sub>5</sub>), 86.7 (*C*<sub>1'</sub>), 84.6 (*C*<sub>4'</sub>), 70.9 (*C*<sub>3'</sub>), 41.0 (*C*<sub>5'</sub>), 39.0 (*C*<sub>2'</sub>), 12.3 (CH<sub>3</sub>); LCMS (ES<sup>+</sup>): *m/z* (%) 439 (100) and 441 (100).

## SUPPORTING INFORMATION

***N*-(5'-deoxy- $\alpha$ -thymidin-5'-yl)-*N'*-(4-bromophenyl)thiourea (23):** 4-Bromophenyl isocyanate reacted with amine **8** to yield compound **23** as a solid;  $^1\text{H-NMR}$  (500MHz, DMSO):  $\delta$  11.26 (s, 1H, NH), 9.71 (s, 1H, NH), 7.88 (s, 1H, NH), 7.79 (d,  $J = 1.20$  Hz, 1H, H6), 7.44-7.50 (m, 4H, H-Ph), 6.21 (qt,  $J = 3.73$  Hz, 1H, H1'), 5.48 (d,  $J = 3.35$  Hz, 1H, OH), 4.34-4.37 (m, 1H, H3'), 4.22-4.25 (m, 1H, H4'), 3.67-3.69, 3.48-3.53 (m, 2H, H5'), 2.57-2.63 (m, 1H, H2'), 1.93-1.96 (m, 1H, H2'), 1.78 (s, 3H, CH<sub>3</sub>);  $^{13}\text{C-NMR}$  (125MHz, DMSO):  $\delta$  180.7 (CS), 163.8 (C4), 150.5 (C2), 136.9 (C6), 138.7, 131.3, 124.8 (C-Ph), 108.8 (C5), 85.7 (C1'), 84.6 (C4'), 79.2 (C3'), 70.9 (C5'), 45.5 (C2'), 12.2 (CH<sub>3</sub>); LCMS (ES<sup>+</sup>):  $m/z$  (%) 455 (100) and 457 (100) [M+H]<sup>+</sup>; HRMS (ES<sup>+</sup>): calcd for C<sub>17</sub>H<sub>20</sub>BrN<sub>4</sub>O<sub>4</sub>S<sub>1</sub> [M+H]<sup>+</sup> 455.0383  $m/z$ , found 455.0373  $m/z$  (2.33 ppm).

***N*-(5'-deoxy- $\alpha$ -thymidin-5'-yl)-*N'*-(2-methoxyphenyl)urea (24):** 2-Methoxyphenyl isocyanate reacted with amine **8** to yield compound **24** as a solid;  $^1\text{H-NMR}$  (500MHz, DMSO):  $\delta$  11.29 (s, 1H, NH), 8.07-8.09 (m, 1H, NH and NH), 7.78 (s, 1H, H6), 6.82-7.02 (m, 4H, H-Ph), 6.19 (qt,  $J = 3.66$  Hz, 1H, H1'), 5.46 (s, 1H, OH), 4.12-4.18 (m, 2H, H3' and H4'), 3.83 (s, 3H, CH<sub>3</sub>), 3.23-3.27, 3.11-3.17 (m, 2H, H5'), 2.55-2.60 (m, 1H, H2'), 1.94 (d,  $J = 14.20$  Hz, 1H, H2'), 1.78 (s, 3H, CH<sub>3</sub>);  $^{13}\text{C-NMR}$  (125MHz, DMSO):  $\delta$  163.8 (C4), 155.2 (CO), 150.5 (C2), 136.9 (C6), 147.3, 129.3, 121.0, 120.4, 118.0, 110.5 (C-Ph), 108.8 (C5), 87.0 (C1'), 84.7 (C4'), 70.8 (C3'), 55.6 (CH<sub>3</sub>), 41.0 (C5'), 39.0 (C2'), 12.3 (CH<sub>3</sub>); LCMS (ES<sup>+</sup>):  $m/z$  (%) 391 (100) [M+H]<sup>+</sup>; HRMS (ES<sup>+</sup>): calcd for C<sub>18</sub>H<sub>23</sub>N<sub>4</sub>O<sub>6</sub> [M+H]<sup>+</sup> 391.1612  $m/z$ , found 391.1615  $m/z$  (-0.61 ppm).

***N*-(5'-deoxy- $\alpha$ -thymidin-5'-yl)-*N'*-(3-methoxyphenyl)urea (25):** 3-Methoxyphenyl isocyanate reacted with amine **8** to yield compound **25** as a solid;  $^1\text{H-NMR}$  (500MHz, DMSO):  $\delta$  11.24 (s, 1H, NH), 8.54 (s, 1H, NH), 7.77 (d,  $J = 1.05$  Hz, 1H, H6), 7.10-7.14 (m, 2H, H-Ph), 6.85 (qt,  $J = 3.05$  Hz, 1H, H-Ph), 6.48 (qt,  $J = 3.36$  Hz, 1H, H-Ph), 6.24 (t,  $J = 5.77$  Hz, 1H, NH), 6.18 (qt,  $J = 3.71$  Hz, 1H, H1'), 5.43 (d,  $J = 3.25$  Hz, 1H, OH), 4.16-4.21 (m, 2H, H3' and H4'), 3.71 (s, 3H, CH<sub>3</sub>), 3.23-3.28, 3.09-3.18 (m, 2H, H5'), 2.55-2.61, 1.92-1.96 (m, 2H, H2'), 1.78 (s, 3H, CH<sub>3</sub>);  $^{13}\text{C-NMR}$  (125MHz, DMSO):  $\delta$  163.8 (C4), 159.6 (CO), 155.1 (C2), 136.9 (C6), 150.5, 141.6, 129.4, 109.0, 106.5, 103.4 (C-Ph), 110.0 (C5), 86.8 (C1'), 84.7 (C4'), 70.9 (C3'), 54.8 (CH<sub>3</sub>), 41.0 (C5'), 39.0 (C2'), 12.3 (CH<sub>3</sub>); LCMS (ES<sup>+</sup>):  $m/z$  (%) 391 (100) [M+H]<sup>+</sup>; HRMS (ES<sup>+</sup>): calcd for C<sub>18</sub>H<sub>23</sub>N<sub>4</sub>O<sub>6</sub> [M+H]<sup>+</sup> 391.1612  $m/z$ , found 391.1629  $m/z$  (-4.33 ppm).

***N*-(5'-deoxy- $\alpha$ -thymidin-5'-yl)-*N'*-(4-methoxyphenyl)urea (26):** 4-Methoxyphenyl isocyanate reacted with amine **8** to yield compound **26** as a solid;  $^1\text{H-NMR}$  (500MHz, DMSO):  $\delta$  11.28 (s, 1H, NH), 8.34 (s, 1H, NH), 7.78 (s, 1H, H6), 7.28 (d,  $J = 8.75$  Hz, 2H, H-Ph), 6.81 (d,  $J = 8.75$  Hz, 2H,

## SUPPORTING INFORMATION

*H*-Ph), 6.14-6.18 (m, 2H, *H*1' and *NH*), 5.44 (d, *J* = 2.45 Hz, 1H, *OH*), 4.18 (d, *J* = 4.50 Hz, 2H, *H*3' and *H*4'), 3.69 (s, 3H, *CH*<sub>3</sub>), 3.16-3.24 (m, 1H, *H*5'), 3.07-3.12 (m, 1H, *H*5'), 2.54-2.60 (m, 1H, *H*2'), 1.93 (d, *J* = 14.20 Hz, 1H, *H*2'), 1.78 (s, 3H, *CH*<sub>3</sub>); <sup>13</sup>C-NMR (125MHz, DMSO): δ 163.8 (*C*4), 155.4 (*CO*), 153.9, 133.7, 119.3, 113.9 (*C*-Ph), 150.5 (*C*2), 136.9 (*C*6), 108.8 (*C*5), 87.0 (*C*1'), 84.7 (*C*4'), 79.1 (*C*3'), 70.8 (*C*5'), 55.1 (*CH*<sub>3</sub>), 41.0 (*C*2'), 12.2 (*CH*<sub>3</sub>); LCMS (ES<sup>+</sup>): *m/z* (%) 391 (100) [*M*+*H*]<sup>+</sup>; HRMS (ES<sup>+</sup>): calcd for C<sub>18</sub>H<sub>23</sub>N<sub>4</sub>O<sub>6</sub> [*M*+*H*]<sup>+</sup> 391.1612 *m/z*, found 391.1613 *m/z* (-0.27 ppm).

***N*-(5'-deoxy- $\alpha$ -thymidin-5'-yl)-*N'*-(4-*tert*-butylphenyl)urea (27):** 4-*tert*-butylphenyl isothiocyanate reacted with amine **8** to yield compound **27** as a solid; <sup>1</sup>H-NMR (500MHz, DMSO): δ 11.28 (s, 1H, *NH*), 8.45 (s, 1H, *NH*), 7.78 (s, 1H, *H*6), 7.29 (d, *J* = 8.70 Hz, 2H, *H*-Ph), 7.23 (d, *J* = 8.70 Hz, 2H, *H*-Ph), 6.17-6.21 (m, 2H, *H*1' and *NH*), 5.45 (d, *J* = 3.15 Hz, 1H, *OH*), 4.16-4.20 (m, 2H, *H*3' and *H*4'), 3.22-3.27 (m, 1H, *H*5'), 3.09-3.14 (m, 1H, *H*5'), 2.54-2.60 (m, 1H, *H*2'), 1.94 (d, *J* = 7.12 Hz, 1H, *H*2'), 1.78 (s, 3H, *CH*<sub>3</sub>), 1.24 (s, 9H, *CH*<sub>3</sub>); <sup>13</sup>C-NMR (125MHz, DMSO): δ 163.8 (*C*4), 155.2 (*CO*), 150.5 (*C*2), 143.3, 137.7 (*C*-Ph), 136.9 (*C*6), 125.2, 117.5 (*C*-Ph), 108.8 (*C*5), 86.9 (*C*1'), 84.6 (*C*4'), 79.1 (*C*3'), 70.8 (*C*5'), 41.0 (*C*2'), 33.8 (*C*(*CH*<sub>3</sub>)<sub>3</sub>), 31.2 (*CH*<sub>3</sub>), 12.2 (*CH*<sub>3</sub>); LCMS (ES<sup>+</sup>): *m/z* (%) 417 (100) [*M*+*H*]<sup>+</sup>; HRMS (ES<sup>+</sup>): calcd for C<sub>21</sub>H<sub>29</sub>N<sub>4</sub>O<sub>5</sub> [*M*+*H*]<sup>+</sup> 417.2106 *m/z*, found 417.2120 *m/z* (-3.37 ppm).

***N*-(5'-deoxy- $\alpha$ -thymidin-5'-yl)-*N'*-(3-trifluoromethyl-4-chlorophenyl)thiourea (28)<sup>10</sup>:** 3-Trifluoromethyl-4-chlorophenyl isothiocyanate reacted with amine **8** to yield compound **29** as a solid; <sup>1</sup>H-NMR (500MHz, DMSO): δ 11.30 (s, 1H, *NH*), 10.01 (s, 1H, *NH*), 8.15 (m, 2H, *H*-Ph and *NH*), 7.79 (s, 1H, *H*6), 7.74 (d, *J* = 9.26 Hz, 1H, *H*-Ph), 7.64 (d, *J* = 8.74 Hz, 1H, *H*-Ph), 6.22 (m, 1H, *H*1'), 5.52 (m, 1H, *OH*), 4.36 (m, 1H, *H*4'), 4.24 (m, 1H, *H*3'), 3.71 (m, 1H, *H*5'), 3.51 (m, 1H, *H*5'), 2.61 (m, 1H, *H*2'), 1.95 (m, 1H, *H*2'), 1.78 (s, 3H, *CH*<sub>3</sub>); <sup>13</sup>C-NMR (125MHz, DMSO): δ 180.7 (*CS*), 163.8 (*C*4), 150.5 (*C*2), 139.1 (*C*6), 136.9, 131.6, 127.2, 124.4, 123.8 (*C*-Ph), 108.9 (*C*5), 85.5 (*C*1'), 84.6 (*C*4'), 70.9 (*C*3'), 48.6 (*C*5'), 45.5 (*C*2'), 12.3 (*CH*<sub>3</sub>); <sup>19</sup>F-NMR (470MHz, DMSO): δ 61.47; LCMS (ES<sup>+</sup>): *m/z* (%) 478 (100) [*M*+*H*]<sup>+</sup>; HRMS (ES<sup>+</sup>): calcd for C<sub>18</sub>H<sub>19</sub>Cl<sub>1</sub>F<sub>3</sub>N<sub>4</sub>O<sub>4</sub>S<sub>1</sub> [*M*+*H*]<sup>+</sup> 479.0762 *m/z*, found 479.0781 *m/z* (-3.93 ppm).

***N*-(5'-deoxy- $\alpha$ -thymidin-5'-yl)-*N'*-(3-trifluoromethyl-4-chlorophenyl)urea (29):** 3-Trifluoromethyl-4-chlorophenyl isocyanate reacted with amine **8** to yield compound **29** as a solid; <sup>1</sup>H-NMR (500MHz, DMSO): δ 11.25 (s, 1H, *NH*), 9.06 (s, 1H, *NH*), 8.06 (d, *J* = 1.60 Hz, 1H, *H*-Ph), 7.77 (d, *J* = 1.20 Hz, 1H, *H*6), 7.54-7.57 (m, 2H, *H*-Ph), 6.45 (t, *J* = 5.82 Hz, 1H, *NH*), 6.18

## SUPPORTING INFORMATION

(qt,  $J = 3.75$  Hz, 1H,  $H1'$ ), 5.44 (d,  $J = 3.35$  Hz, 1H, OH), 4.16-4.22 (m, 2H,  $H3'$  and  $H4'$ ), 3.23-3.28, 3.11-3.18 (m, 2H,  $H5'$ ), 2.55-2.61 (m, 1H,  $H2'$ ), 1.92-1.96 (m, 1H,  $H2'$ ), 1.78 (s, 3H,  $CH_3$ );  $^{13}C$ -NMR (125MHz, DMSO):  $\delta$  163.8 ( $C4$ ), 154.9 (CO), 150.5 ( $C2$ ), 136.89 ( $C6$ ), 140.0, 131.9, 126.5, 122.3, 121.5, 116.1 ( $C$ -Ph), 108.8 ( $C5$ ), 86.6 ( $C1'$ ), 84.6 ( $C4'$ ), 70.8 ( $C3'$ ), 41.1 ( $C5'$ ), 39.0 ( $C2'$ ), 12.2 ( $CH_3$ ); LCMS ( $ES^+$ ):  $m/z$  (%) 463 (100) [ $M+H$ ] $^+$ ; HRMS ( $ES^+$ ): calcd for  $C_{18}H_{23}N_4O_5$  [ $M+H$ ] $^+$  463.0991  $m/z$ , found 463.0989  $m/z$  (0.35 ppm).

***N*-(5'-deoxy- $\alpha$ -thymidin-5'-yl)-*N'*-(4-nitrophenyl)urea (30):** 4-Nitrophenyl isocyanate reacted with amine **8** to yield compound **30** as a solid;  $^1H$ -NMR (500MHz, DMSO):  $\delta$  11.29 (s, 1H, NH), 9.36 (s, 1H, NH), 8.15 (d,  $J = 9.27$  Hz, 1H, 2H,  $H$ -Ph), 7.78 (s, 1H,  $H6$ ), 7.62 (d,  $J = 9.25$  Hz, 2H,  $H$ -Ph), 6.57 (t,  $J = 5.71$  Hz, 1H, NH), 6.19 (m, 1H,  $H1'$ ), 5.48 (d,  $J = 3.34$  Hz, 1H, OH), 4.17, 4.22 (m, 2H,  $H3'$  and  $H4'$ ); 3.14, 3.29 (m, 2H,  $H5'$ ), 2.59, 1.95 (m, 2H,  $H2'$ ); 1.78 (s, 3H,  $CH_3$ );  $^{13}C$ -NMR (125MHz, DMSO):  $\delta$  163.8 ( $C4$ ), 154.4 (CO), 150.5 ( $C2'$ ), 136.9 ( $C6$ ), 147.0, 140.4, 125.2, 116.8 ( $C$ -Ph), 108.9 ( $C5$ ), 86.4 ( $C1'$ ), 84.6 ( $C4'$ ), 79.1 ( $C3'$ ), 70.8 ( $C5'$ ), 41.0 ( $C2'$ ), 12.3 ( $CH_3$ ); LCMS ( $ES^+$ ):  $m/z$  (%) 406 (100) [ $M+H$ ] $^+$ ; HRMS ( $ES^+$ ): calcd for  $C_{17}H_{20}N_5O_7$  [ $M+H$ ] $^+$  406.1357  $m/z$ , found 406.1372  $m/z$  (-3.75 ppm).

**5'-*O*-methanesulfonyl- $\beta$ -thymidine (31):** Thymidine (484 mg, 2 mmol) was reacted with methanesulfonyl chloride (154  $\mu$ l, 2 mmol) following the procedure of compound **6** to yield compound **31** 320mg (49.8 %) as a solid.  $^1H$ -NMR (500MHz, DMSO):  $\delta$  11.37 (s, 1H, NH), 7.49 (s, 1H,  $H6$ ), 6.23 (t,  $J = 7.65$  Hz, 1H,  $H1'$ ), 5.51 (d,  $J = 4.00$  Hz, 1H,  $H4'$ ), 4.25-4.41 (m, 3H,  $H3'$  and  $H5'$ ), 3.95-3.98 (m, 1H, OH), 3.23 (s, 3H,  $CH_3$ ), 2.07-2.21 (m, 2H,  $H2'$ ), 1.77 (s, 3H,  $CH_3$ );  $^{13}C$ -NMR (125MHz, DMSO):  $\delta$  163.6 ( $C4$ ), 150.4 ( $C2$ ), 135.8 ( $C6$ ), 109.9 ( $C5$ ), 83.9 ( $C1'$ ), 83.3 ( $C4'$ ), 70.1 ( $C3'$ ), 69.6 ( $C5'$ ), 38.3 ( $C2'$ ), 36.7 ( $CH_3$ ), 12.0 ( $CH_3$ ); LCMS ( $ES^+$ ):  $m/z$  (%) 321 (100) [ $M+H$ ] $^+$ ; HRMS ( $ES^+$ ): calcd for  $C_{11}H_{17}N_2O_7S_1$  [ $M+H$ ] $^+$  321.0751  $m/z$ , found 321.0754  $m/z$  (-0.98 ppm).

**5'- azido-5'-deoxy- $\beta$ -thymidine (32):** Compound **31** (3 mmol) was reacted with  $NaN_3$  (6 mmol) following the procedure of preparation compound **7** to yield compound **32** 516 mg (64 %) as a solid.  $^1H$ -NMR (500MHz, MeOD):  $\delta$  7.56 (s, 1H,  $H6$ ), 6.28 (t,  $J = 6.80$  Hz, 1H,  $H1'$ ), 4.36 (m, 1H,  $H4'$ ), 3.97 (dd,  $J_1 = 8.70$ ,  $J_2 = 3.98$ , 1H,  $H3'$ ), 3.57-3.67 (m, 2H,  $H5'$ ), 2.25-2.35 (m, 2H,  $H2'$ ), 1.91 (s, 3H,  $CH_3$ );  $^{13}C$ -NMR (125MHz, MeOD):  $\delta$  166.3 ( $C4$ ), 152.3 ( $C2$ ), 137.8 ( $C6$ ), 111.9 ( $C5$ ), 86.4 ( $C1'$ ), 86.3 ( $C4'$ ), 72.5 ( $C3'$ ), 53.4 ( $C5'$ ), 40.2 ( $C2'$ ), 12.5 ( $CH_3$ ); LCMS ( $ES^+$ ):  $m/z$  (%) 268 (100)

## SUPPORTING INFORMATION

$[M+H]^+$ ; HRMS ( $ES^+$ ): calcd for  $C_{10}H_{14}N_5O_4$   $[M+H]^+$  268.1040  $m/z$ , found 268.1038  $m/z$  (0.88 ppm).

**5'-amino-5'-deoxy- $\beta$ -thymidine (33):** Compound **32** (268 mg, 1 mmol) was hydrogenated to give compound **33** 237 mg (98.3 %) as a solid.  $^1H$ -NMR (500MHz, MeOD):  $\delta$  7.37 (s, 1H,  $H6$ ), 6.11 (t,  $J = 6.84$  Hz, 1H,  $H1'$ ), 4.14 (m, 1H,  $H3'$ ), 3.17 (m, 1H,  $H4'$ ), 3.20-3.24 (m, 2H,  $NH_2$ ), 2.72-2.83 (m, 2H,  $H5'$ ), 2.10-2.20 (m, 2H,  $H2'$ ), 1.79 (s, 3H,  $CH_3$ );  $^{13}C$ -NMR (125MHz, MeOD):  $\delta$  166.6 ( $C4$ ), 152.5 ( $C2$ ), 138.1 ( $C6$ ), 111.9 ( $C5$ ), 88.5 ( $C1'$ ), 86.2 ( $C4'$ ), 72.9 ( $C3'$ ), 44.7 ( $C5'$ ), 40.2 ( $C2'$ ), 12.5 ( $CH_3$ ); LCMS ( $ES^+$ ):  $m/z$  (%) 242 (100)  $[M+H]^+$ ; HRMS ( $ES^+$ ): calcd for  $C_{10}H_{16}N_3O_4$   $[M+H]^+$  242.1135  $m/z$ , found 242.1131  $m/z$  (1.98ppm).

### General Procedure for compounds 34 - 55

For the synthesis of compounds **34 - 55**, compound of amine **33** (1 eq.) was dissolved in DMF at 0 °C. The coupling reagents (1.1 eq.) were added and the reaction mixture was allowed to stir at room temperature for 3 h. After the completion of the reaction, the reaction mixture was evaporated to dry (ethanol and toluene were used to co-evaporate) and the residue was purified by column chromatography to yield the compounds **34 - 55** as a solid with the yields ranging from 41% to 84 %.

**5'-(4-nitro-phenyl)sulfoamido-5'-deoxy- $\beta$ -thymidine (34):** 4-Nitrobenzolsulfonyl chloride reacted with amine **33** to yield compound **34** as a solid;  $^1H$ -NMR (500MHz, DMSO):  $\delta$  11.31 (s, 1H,  $NH$ ), 8.40 (d,  $J = 8.7$  Hz, 2H,  $H$ -Ph), 8.32 (s, 1H,  $NH$ ), 8.05 (d,  $J = 8.7$  Hz, 2H,  $H$ -Ph), 7.48 (s, 1H,  $H6$ ), 6.10 (t,  $J = 7.0$  Hz, 1H,  $H1'$ ), 5.34 (s, 1H,  $OH$ ), 4.13 (d,  $J = 2.4$  Hz, 1H,  $H4'$ ), 3.68-3.71 (m, 1H,  $H3'$ ), 3.15 (qt,  $J = 6.1$  Hz, 1H,  $H5'$ ), 3.01 (qt,  $J = 6.9$  Hz, 1H,  $H5'$ ), 2.11-2.17 (m, 1H,  $H2'$ ), 1.99-2.04 (m, 1H,  $H2'$ ), 1.78 (s, 3H,  $CH_3$ );  $^{13}C$ -NMR (125MHz, DMSO):  $\delta$  163.7 ( $C4$ ), 150.4, 149.4 ( $C$ -Ph), 146.2 ( $C2$ ), 136.3 ( $C6$ ), 128.0, 124.5 ( $C$ -Ph), 109.6 ( $C5$ ), 84.6 ( $C1'$ ), 83.8 ( $C4'$ ), 70.8 ( $C3'$ ), 44.7 ( $C5'$ ), 38.1 ( $C2'$ ), 12.0 ( $CH_3$ ); LCMS ( $ES^+$ ):  $m/z$  (%) 427 (100)  $[M+H]^+$ ; HRMS ( $ES^+$ ): calcd for  $C_{16}H_{19}N_4O_8S_1$   $[M+H]^+$  427.0918  $m/z$ , found 427.0920  $m/z$  (-0.44 ppm).

**5'-(2-naphthyl)sulfoamido-5'-deoxy- $\beta$ -thymidine (35):** 2-Naphthalenesulfonyl chloride reacted with amine **33** to yield compound **35** as a solid;  $^1H$ -NMR (500MHz, DMSO):  $\delta$  11.31 (s, 1H,  $NH$ ), 8.46 (s, 1H,  $NH$ ), 8.14 (t,  $J = 8.02$  Hz, 1H,  $H$ -Ph), 8.04 (t,  $J = 7.57$  Hz, 2H,  $H$ -Ph), 7.85 (qt,  $J = 3.48$  Hz, 2H,  $H$ -Ph), 7.67-7.73 (m, 2H,  $H$ -Ph), 7.51 (d,  $J = 0.95$  Hz, 1H,  $H6$ ), 6.12 (qt,  $J = 4.68$  Hz, 1H,  $H1'$ ), 5.33 (d,  $J = 4.30$  Hz, 1H,  $OH$ ), 4.13-4.16 (m, 1H,  $H4'$ ), 3.73-3.74 (m, 1H,  $H3'$ ), 3.04-3.08 (m, 1H,  $H5'$ ), 2.95-2.97 (m, 1H,  $H5'$ ), 2.10-2.12 (m, 1H,  $H2'$ ), 2.02-2.03 (m, 1H,  $H2'$ ), 1.76 (s, 3H,

## SUPPORTING INFORMATION

$CH_3$ );  $^{13}C$ -NMR (125MHz, DMSO):  $\delta$  163.7 (C4), 150.4 (C2), 136.2 (C6), 137.5, 134.1, 131.7, 129.4, 129.1, 128.7, 127.8, 127.6, 127.3, 122.2 (C-Ph), 109.6 (C5), 84.7 (C1'), 83.8 (C4'), 70.8 (C3'), 44.7 (C5'), 38.2 (C2'), 12.0 ( $CH_3$ ); LCMS (ES<sup>+</sup>): m/z (%) 432 (100) [M+H]<sup>+</sup>; HRMS (ES<sup>+</sup>): calcd for C<sub>20</sub>H<sub>22</sub>N<sub>3</sub>O<sub>6</sub>S<sub>1</sub> [M+H]<sup>+</sup> 432.1224 m/z, found 432.1223 m/z (0.15 ppm).

**5'-(2-naphthyl)amido-5'-deoxy- $\beta$ -thymidine (36):** 2-Naphthoyl chloride reacted with amine **33** to yield compound **37** as a solid;  $^1H$ -NMR (500MHz, DMSO):  $\delta$  11.33 (s, 1H, NH), 8.84 (t,  $J$  = 5.72 Hz, 1H, NH), 7.95-8.04 (m, 4H, H-Ph), 7.56-7.67 (m, 4H, H-Ph), 6.17 (qt,  $J$  = 4.66 Hz, 1H, HI'), 5.38 (s, 1H, OH), 4.30 (t,  $J$  = 2.80 Hz, 1H, H3'), 3.94-3.97 (m, 1H, H4'), 3.59 (t,  $J$  = 5.92 Hz, 2H, H5'), 2.07-2.19 (m, 2H, H2'), 1.76 (s, 3H, CH<sub>3</sub>);  $^{13}C$ -NMR (125MHz, DMSO):  $\delta$  166.5 (C4), 163.7 (CO), 150.4 (C2), 134.1 (C6), 131.6, 129.2, 128.8, 127.9, 127.6, 127.5, 126.7, 124.2 (C-Ph), 109.6 (C5), 84.9 (C1'), 83.9 (C4'), 71.3 (C3'), 41.7 (C5'), 38.4 (C2'), 12.0 ( $CH_3$ ); LCMS (ES<sup>+</sup>): m/z (%) 396 (100) [M+H]<sup>+</sup>; HRMS (ES<sup>+</sup>): calcd for C<sub>21</sub>H<sub>22</sub>N<sub>3</sub>O<sub>5</sub> [M+H]<sup>+</sup> 396.1554 m/z, found 396.1565 m/z (-2.90 ppm).

**5'-(4-nitro-phenyl)amido-5'-deoxy-thymidine (37):** 4-Nitrobenzoyl chloride reacted with amine **33** to yield compound **36** as a solid;  $^1H$ -NMR (500MHz, DMSO):  $\delta$  11.36 (s, 1H, NH), 9.01 (s, 1H, NH), 8.33 (d,  $J$  = 8.70 Hz, 2H, H-Ph), 8.09 (d,  $J$  = 8.70 Hz, 2H, H-Ph), 7.53 (s, 1H, H6), 6.15 (t,  $J$  = 8.7 Hz, 1H, HI'), 5.40 (s, 1H, OH), 4.27 (m, 1H, H3'), 3.89-3.93 (m, 1H, H4'), 3.53-3.58 (m, 2H, H5'), 2.06-2.22 (m, 2H, H2'), 1.77 (s, 3H, CH<sub>3</sub>);  $^{13}C$ -NMR (125MHz, DMSO):  $\delta$  164.9 (CO), 163.7 (C4), 151.0 (C-Ph), 140.7 (C-Ph), 137.1 (C6), 128.8, 123.6 (C-Ph), 109.7 (C5), 84.6 (C1'), 84.1 (C4'), 71.3 (C3'), 57.1 (C5'), 38.3 (C2'), 12.0 ( $CH_3$ ); LCMS (ES<sup>+</sup>): m/z (%) 391 (100) [M+H]<sup>+</sup>; HRMS (ES<sup>+</sup>): calcd for C<sub>17</sub>H<sub>19</sub>N<sub>4</sub>O<sub>7</sub> [M+H]<sup>+</sup> 391.1248 m/z, found 391.1246 m/z (0.66 ppm).

**5'-(4-nitro-benzyl)amino-5'-deoxy- $\beta$ -thymidine (38):** 4-Nitrobenzyl chloride reacted with amine **33** to yield compound **38** as a solid;  $^1H$ -NMR (500MHz, DMSO):  $\delta$  11.31 (s, 1H, NH), 8.19 (d,  $J$  = 8.65 Hz, 2H, H-Ph), 7.63 (d,  $J$  = 8.55 Hz, 2H, H-Ph), 7.56 (s, 1H, H6), 6.14 (t,  $J$  = 6.90 Hz, 1H, HI'), 5.26 (d,  $J$  = 4.30 Hz, 1H, OH), 4.20 (m, 1H, H3'), 3.87 (s, 2H, CH<sub>2</sub>), 3.78-3.81 (m, 1H, H4'), 2.65-2.75 (m, 2H, H5'), 2.03-2.16 (m, 2H, H2'), 1.73 (s, 3H, CH<sub>3</sub>);  $^{13}C$ -NMR (125MHz, DMSO):  $\delta$  163.7 (C4), 150.4 (C2), 149.4, 146.2 (C-Ph), 136.2 (C6), 128.8, 123.3 (C-Ph), 109.5 (C5), 85.7 (C1'), 83.6 (C4'), 71.3 (C3'), 52.2 (C5'), 50.5 (CH<sub>2</sub>), 38.7 (C2'), 12.1 ( $CH_3$ ); LCMS (ES<sup>+</sup>): m/z (%) 377 (100) [M+H]<sup>+</sup>; HRMS (ES<sup>+</sup>): calcd for C<sub>17</sub>H<sub>21</sub>N<sub>4</sub>O<sub>6</sub> [M+H]<sup>+</sup> 377.1456 m/z, found 377.1440 m/z (4.10 ppm).

## SUPPORTING INFORMATION

***N*-(5'-deoxy- $\beta$ -thymidin-5'-yl)-*N'*-(carboethoxyethyl)urea (39):** Ethyl 3-isocyanatopropanoate reacted with amine **33** to yield compound **39** as a solid;  $^1\text{H-NMR}$  (500MHz, DMSO):  $\delta$  11.27 (s, 1H, NH), 7.48 (s, 1H, H6), 6.11-6.16 (m, 2H, H1' and NH), 6.00 (t,  $J = 5.55$  Hz, 1H, NH), 5.25 (d,  $J = 4.0$  Hz, 1H, OH), 4.03 (m, 1H, H4'), 4.03-4.08 (m, 2H, CH<sub>2</sub>), 3.70 (m, 1H, H3'), 3.21-3.24 (m, 2H, CH<sub>2</sub>), 3.11-3.16 (m, 1H, H5'), 2.50 (s, 1H, H5'), 2.40 (t,  $J = 6.45$  Hz, 2H, CH<sub>2</sub>), 2.04-2.11 (m, 2H, CH<sub>2</sub>), 1.80 (s, 3H, CH<sub>3</sub>), 1.18 (t,  $J = 7.07$  Hz, 3H, CH<sub>3</sub>);  $^{13}\text{C-NMR}$  (125MHz, DMSO):  $\delta$  171.7 (CO), 163.7 (C4), 157.9 (CO), 150.4 (C2), 136.0 (C6), 109.7 (C5), 85.6 (C1'), 83.7 (C4'), 71.1 (C3'), 59.8 (C5'), 41.6 (CH<sub>2</sub>), 38.5 (C2'), 35.3 (CH<sub>2</sub>), 34.9 (CH<sub>2</sub>), 14.0 (CH<sub>3</sub>), 12.0 (CH<sub>3</sub>); LCMS (ES<sup>+</sup>):  $m/z$  (%) 385 (100) [M+H]<sup>+</sup>; HRMS (ES<sup>+</sup>): calcd for C<sub>16</sub>H<sub>25</sub>N<sub>4</sub>O<sub>7</sub> [M+H]<sup>+</sup> 385.1718  $m/z$ , found 385.1708  $m/z$  (2.64 ppm).

***N*-(5'-deoxy- $\beta$ -thymidin-5'-yl)-*N'*-benzylurea (40):** Benzyl isocyanate reacted with amine **33** to yield compound **40** as a solid;  $^1\text{H-NMR}$  (500MHz, DMSO):  $\delta$  11.33 (s, 1H, NH), 7.51 (s, 1H, H6), 7.20-7.32 (m, 5H, H-Ph), 6.43 (t,  $J = 5.87$  Hz, 1H, NH), 6.15-6.18 (m, 2H, NH and H1'), 5.32 (d,  $J = 3.92$  Hz, 1H, OH), 4.23 (t,  $J = 5.62$  Hz, 2H, CH<sub>2</sub>), 4.15 (s, 1H, H3'), 3.73-3.75 (m, 1H, H4'), 3.37-3.41 (m, 1H, H5'), 3.17-3.21 (m, 1H, H5'), 2.03-2.13 (m, 2H, H2'), 1.78 (s, 3H, CH<sub>3</sub>);  $^{13}\text{C-NMR}$  (125MHz, DMSO):  $\delta$  163.7 (C4), 158.1 (CO), 150.5 (C2), 140.8 (C-Ph), 136.0 (C6), 128.2, 126.92, 126.5 (C-Ph), 109.8 (C5), 85.6 (C1'), 83.7 (C4'), 71.1 (C3'), 42.9 (C5'), 41.8 (CH<sub>2</sub>), 38.5 (C2'), 12.0 (CH<sub>3</sub>); LCMS (ES<sup>+</sup>):  $m/z$  (%) 375 (100) [M+H]<sup>+</sup>; HRMS (ES<sup>+</sup>): calcd for C<sub>18</sub>H<sub>23</sub>N<sub>4</sub>O<sub>5</sub> [M+H]<sup>+</sup> 375.1663  $m/z$ , found 375.1661  $m/z$  (0.54ppm).

***N*-(5'-deoxy- $\beta$ -thymidin-5'-yl)-*N'*-(3-pyridyl)urea (41):** Pyridine 3-isocyanate reacted with amine **33** to yield compound **41** as a solid;  $^1\text{H-NMR}$  (500MHz, DMSO):  $\delta$  11.32 (s, 1H, NH), 8.72 (s, 1H, NH), 8.53 (d,  $J = 2.4$  Hz, 1H, H-Ph), 8.12 (m, 1H, H-Ph), 7.87 (m, 1H, H-Ph), 7.51 (d,  $J = 0.9$  Hz, 1H, H6), 7.25 (qt,  $J = 4.3$  Hz, 1H, H-Ph), 6.45 (s, 1H, NH), 6.18 (qt,  $J = 4.6$  Hz, 1H, H1'), 5.33 (d,  $J = 4.2$  Hz, 1H, OH), 4.17 (d,  $J = 2.8$  Hz, 1H, H3'), 3.79 (m, 1H, H4'), 3.46-3.52 (m, 1H, H5'), 3.24-3.30 (m, 1H, H5'), 2.15-2.21 (m, 1H, H2'), 2.05-2.11 (m, 1H, H2'); 1.77 (s, 1H, CH<sub>3</sub>);  $^{13}\text{C-NMR}$  (125MHz, DMSO):  $\delta$  163.7 (C4), 155.2 (CO), 150.5 (C2), 137.0 (C6), 142.2, 139.5, 136.0, 124.4, 123.5 (C-Ph), 109.7 (C5), 85.2 (C1'), 83.8 (C4'), 71.1 (C3'), 41.5 (C5'), 38.4 (C2'); LCMS (ES<sup>+</sup>):  $m/z$  (%) 362 (100) [M+H]<sup>+</sup>; HRMS (ES<sup>+</sup>): calcd for C<sub>16</sub>H<sub>20</sub>N<sub>5</sub>O<sub>5</sub> [M+H]<sup>+</sup> 362.1459  $m/z$ , found 362.1454  $m/z$  ( 1.27 ppm).

***N*-(5'-deoxy- $\beta$ -thymidin-5'-yl)-*N'*-phenylurea (42):** Phenyl isocyanate reacted with amine **33** to yield compound **42** as a solid;  $^1\text{H-NMR}$  (500MHz, DMSO):  $\delta$  11.33 (s, 1H, NH), 8.54 (s, 1H, NH),



## SUPPORTING INFORMATION

7.53 (d,  $J = 0.75$  Hz, 1H, *H6*), 7.38 (d,  $J = 7.65$  Hz, 2H, *H-Ph*), 7.22 (t,  $J = 7.90$  Hz, 2H, *H-Ph*), 6.89 (t,  $J = 7.32$  Hz, 1H, *H-Ph*), 6.31 (t,  $J = 5.65$  Hz, 1H, *NH*), 6.18 (qt,  $J = 4.68$  Hz, 1H, *H1'*), 5.35 (d,  $J = 4.20$ , 1H, *OH*), 4.17 (d,  $J = 2.6$  Hz, 1H, *H3'*), 3.76-3.79 (m, 1H, *H4'*), 3.44-3.49 (m, 1H, *H5'*), 3.20-3.26 (m, 1H, *H5'*), 2.14-2.19 (m, 1H, *H2'*), 2.05-2.09 (m, 1H, *H2'*), 1.78 (s, 3H, *CH3*);  $^{13}\text{C-NMR}$  (125MHz, DMSO):  $\delta$  163.7 (*C4*), 155.2 (*CO*), 150.5 (*C2*), 136.1 (*C5*), 140.4, 128.6, 121.1, 117.5 (*C-Ph*), 109.8 (*C6*), 85.3 (*C1'*), 83.7 (*C4'*), 71.1 (*C3'*), 41.4 (*C5'*), 38.4 (*C2'*), 12.0 (*CH3*); LCMS ( $\text{ES}^+$ ):  $m/z$  (%) 361 (100) [ $\text{M}+\text{H}$ ] $^+$ ; HRMS ( $\text{ES}^+$ ): calcd for  $\text{C}_{17}\text{H}_{21}\text{N}_4\text{O}_5$  [ $\text{M}+\text{H}$ ] $^+$  361.1506  $m/z$ , found 361.1513  $m/z$  (-1.80ppm).

***N*-(5'-deoxy- $\beta$ -thymidin-5'-yl)-*N'*-(2-chloro-phenyl)urea (43):** 2-Chlorophenyl isocyanate reacted with amine **33** to yield compound **43** as a solid;  $^1\text{H-NMR}$  (500MHz, DMSO):  $\delta$  11.34 (s, 1H, *NH*), 8.16 (d,  $J = 8.10$  Hz, 2H, *NH*), 8.12 (s, 1H, *NH*), 7.51 (s, 1H, *H6*), 7.39 (d,  $J = 7.40$  Hz, 1H, *H-Ph*), 7.23 (t,  $J = 7.32$  Hz, 2H, *H-Ph*), 6.95 (t,  $J = 7.17$  Hz, 1H, *H-Ph*), 6.20 (t,  $J = 6.95$  Hz, 1H, *H1'*), 5.38 (d,  $J = 4.15$  Hz, 1H, *OH*), 4.17 (d,  $J = 2.35$  Hz, 1H, *H3'*), 3.77 (t,  $J = 3.47$  Hz, 1H, *H4'*), 3.50-3.55 (m, 1H, *H5'*), 3.22-3.27 (m, 1H, *H5'*), 2.16-2.22 (m, 1H, *H2'*), 2.06-2.11 (m, 1H, *H2'*), 1.77 (s, 3H, *CH3*);  $^{13}\text{C-NMR}$  (125MHz, DMSO):  $\delta$  163.7 (*C4*), 154.8 (*CO*), 150.5 (*C2*), 136.6 (*C6*), 136.0, 129.0, 127.4, 122.5, 121.1, 120.7 (*C-Ph*), 109.8 (*C5*), 85.2 (*C1'*), 83.6 (*C4'*), 71.1 (*C3'*), 41.4 (*C5'*), 38.4 (*C2'*), 12.0 (*CH3*); LCMS ( $\text{ES}^+$ ):  $m/z$  (%) 395 (100) [ $\text{M}+\text{H}$ ] $^+$ ; HRMS ( $\text{ES}^+$ ): calcd for  $\text{C}_{17}\text{H}_{20}\text{Cl}_1\text{N}_4\text{O}_5$  [ $\text{M}+\text{H}$ ] $^+$  395.1117  $m/z$ , found 395.1103  $m/z$  (3.45 ppm).

***N*-(5'-deoxy- $\beta$ -thymidin-5'-yl)-*N'*-(3-chloro-phenyl)urea (44):** 3-Chlorophenyl isocyanate reacted with amine **33** to yield compound **44** as a solid;  $^1\text{H-NMR}$  (500MHz, DMSO):  $\delta$  11.35 (s, 1H, *NH*), 8.81 (s, 1H, *NH*), 7.71 (s, 1H, *H-Ph*), 7.56 (s, 1H, *H6*), 7.26 (t,  $J = 8.0$  Hz, 1H, *H-Ph*), 7.18 (d,  $J = 8.2$  Hz, 1H, *H-Ph*), 6.96 (d,  $J = 7.8$  Hz, 1H, *H-Ph*), 6.43 (t,  $J = 5.6$  Hz, 1H, *NH*), 6.21 (t,  $J = 6.97$  Hz, 1H, *H1'*), 5.38 (d,  $J = 4.18$  Hz, 1H, *OH*), 4.19 (m, 1H, *H3'*), 3.80 (t,  $J = 3.15$  Hz, 1H, *H4'*), 3.45-3.53 (m, 1H, *H5'*), 3.24-3.29 (m, 1H, *H5'*), 2.16-2.21 (m, 1H, *H2'*), 2.07-2.11 (m, 1H, *H2'*), 1.80 (s, 3H, *CH3*);  $^{13}\text{C-NMR}$  (125MHz, DMSO):  $\delta$  163.7 (*C4*), 155.0 (*CO*), 150.5 (*C2*), 141.9 (*C-Ph*), 136.1 (*C6*), 133.1, 130.3, 120.7, 116.9, 116.0 (*C-Ph*), 109.8 (*C5*), 85.2, 83.7 (*C4'*), 71.1 (*C3'*), 41.4 (*C5'*), 38.4 (*C2'*), 12.0 (*CH3*); LCMS ( $\text{ES}^+$ ):  $m/z$  (%) 395 (100) [ $\text{M}+\text{H}$ ] $^+$ ; HRMS ( $\text{ES}^+$ ): calcd for  $\text{C}_{17}\text{H}_{20}\text{Cl}_1\text{N}_4\text{O}_5$  [ $\text{M}+\text{H}$ ] $^+$  395.1117  $m/z$ , found 395.1105  $m/z$  (2.25 ppm).

***N*-(5'-deoxy- $\beta$ -thymidin-5'-yl)-*N'*-(4-chloro-phenyl)urea (45):** 4-Chlorophenyl isocyanate reacted with amine **33** to yield compound **45** as a solid;  $^1\text{H-NMR}$  (500MHz, DMSO):  $\delta$  11.30 (s, 1H, *NH*), 8.72 (s, 1H, *NH*), 7.51 (d,  $J = 1.05$  Hz, 1H, *H6*), 7.40-7.43 (m, 2H, *H-Ph*), 7.25-7.28 (m, 2H, *H-Ph*),

## SUPPORTING INFORMATION

6.36 (t,  $J = 5.82$  Hz, 1H, NH), 6.18 (qt,  $J = 4.70$  Hz, 1H,  $H1'$ ), 5.33 (d,  $J = 4.25$  Hz, 1H, OH), 4.15-4.18 (m, 1H,  $H3'$ ), 3.76-3.78 (m, 1H,  $H4'$ ), 3.44-3.49 (m, 1H,  $H5'$ ), 3.21-3.26 (m, 1H,  $H5'$ ), 2.14-2.19 (m, 1H,  $H2'$ ), 2.05-2.09 (m, 1H,  $H2'$ ), 1.77 (s, 3H,  $CH_3$ );  $^{13}C$ -NMR (125MHz, DMSO):  $\delta$  163.7 ( $C4$ ), 155.1 (CO), 150.5 ( $C2$ ), 139.4 ( $C$ -Ph), 136.1 ( $C6$ ), 128.5, 124.5, 119.0 ( $C$ -Ph), 109.8 ( $C5$ ), 85.2 ( $C1'$ ), 83.7 ( $C4'$ ), 71.1 ( $C3'$ ), 41.4 ( $C5'$ ), 38.4 ( $C2'$ ), 12.0 ( $CH_3$ ); LCMS ( $ES^+$ ):  $m/z$  (%) 395 (100)  $[M+H]^+$ ; HRMS ( $ES^+$ ): calcd for  $C_{17}H_{20}Cl_1N_4O_5$   $[M+H]^+$  395.1117  $m/z$ , found 395.1114  $m/z$  (0.49 ppm).

***N*-(5'-deoxy- $\beta$ -thymidin-5'-yl)-*N'*-(4-chloro-phenyl)thiourea (46):** 4-Chlorophenyl isothiocyanate reacted with amine **33** to yield compound **46** as a solid;  $^1H$ -NMR (500MHz, DMSO):  $\delta$  11.35 (s, 1H, NH), 9.70 (s, 1H, NH), 7.92 (s, 1H, NH), 7.48-7.51, 7.34-7.37 (m, 5H,  $H6$  and  $H$ -Ph), 6.19 (qt,  $J = 4.70$  Hz, 1H,  $H1'$ ), 5.39 (d,  $J = 4.40$  Hz, 1H, OH), 4.23 (d,  $J = 2.55$  Hz, 1H,  $H3'$ ), 3.92-3.94 (m, 2H,  $H4'$  and  $H5'$ ), 3.61-3.63 (m, 1H,  $H5'$ ), 2.17-2.22, 2.06-2.10 (m, 2H,  $H2'$ ), 1.79 (s, 3H,  $CH_3$ );  $^{13}C$ -NMR (125MHz, DMSO):  $\delta$  180.7 (CS), 163.7 ( $C4$ ), 150.5 ( $C2$ ), 136.1 ( $C6$ ), 138.3, 128.3, 127.8, 124.4 ( $C$ -Ph), 109.8 ( $C5$ ), 84.1 ( $C1'$ ), 83.9 ( $C4'$ ), 71.2 ( $C3'$ ), 46.3 ( $C5'$ ), 38.2 ( $C2'$ ), 12.2 ( $CH_3$ ); LCMS ( $ES^+$ ):  $m/z$  (%) 411 (100)  $[M+H]^+$ ; HRMS ( $ES^+$ ): calcd for  $C_{17}H_{20}Cl_1N_4O_4S_1$   $[M+H]^+$  411.0888  $m/z$ , found 411.0885  $m/z$  (0.74 ppm).

***N*-(5'-deoxy- $\beta$ -thymidin-5'-yl)-*N'*-(4-bromo-phenyl)urea (47):** 4-Bromophenyl isocyanate reacted with amine **33** to yield compound **47** as a solid;  $^1H$ -NMR (500MHz, DMSO):  $\delta$  11.34 (s, 1H, NH), 8.70 (s, 1H, NH), 7.51 (s, 1H,  $H6$ ), 7.35-7.41 (m, 4H,  $H$ -Ph), 6.37 (t,  $J = 5.03$  Hz, 1H, NH), 6.18 (t,  $J = 7.35$  Hz, 1H,  $H1'$ ), 5.35 (d,  $J = 4.20$  Hz, 1H, OH), 4.16 (m, 1H,  $H3'$ ), 3.77 (m, 1H,  $H4'$ ), 3.46 (m, 1H,  $H5'$ ), 3.22 (m, 1H,  $H5'$ ), 2.16 (m, 1H,  $H2'$ ), 2.06 (m, 1H,  $H2'$ ), 1.77 (s, 3H,  $CH_3$ );  $^{13}C$ -NMR (125MHz, DMSO):  $\delta$  163.7 ( $C4$ ), 155.0 (CO), 150.5 ( $C2$ ), 136.1 ( $C6$ ), 139.8, 131.6, 119.5, 112.3 ( $C$ -Ph), 109.8 ( $C5$ ), 85.2 ( $C1'$ ), 83.7 ( $C4'$ ), 71.1 ( $C3'$ ), 41.4 ( $C5'$ ), 38.3 ( $C2'$ ), 12.0 ( $CH_3$ ); LCMS ( $ES^+$ ):  $m/z$  (%) 439 and 441 (100)  $[M+H]^+$ ; HRMS ( $ES^+$ ): calcd for  $C_{17}H_{20}Br_1N_4O_5$   $[M+H]^+$  439.0612  $m/z$ , found 436.0615  $m/z$  (-0.72 ppm).

***N*-(5'-deoxy- $\beta$ -thymidin-5'-yl)-*N'*-(4-bromo-phenyl)thiourea (48):** 4-Bromophenyl isothiocyanate reacted with amine **33** to yield compound **48** as a solid;  $^1H$ -NMR (500MHz, DMSO):  $\delta$  11.32 (s, 1H, NH), 9.68 (s, 1H, NH), 7.93 (s, 1H, NH), 7.44-7.51 (m, 5H,  $H$ -Ph), 6.19 (qt,  $J = 4.70$  Hz, 1H,  $H1'$ ), 5.36 (d,  $J = 4.35$  Hz, 1H, OH), 4.22-4.23 (m, 1H,  $H3'$ ), 3.92-3.94 (m, 2H,  $H4'$  and  $H5'$ ), 3.61-3.64 (m, 1H,  $H5'$ ), 2.17-2.22, 2.06-2.11 (m, 2H,  $H2'$ ), 1.79 (s, 3H,  $CH_3$ );  $^{13}C$ -NMR (125MHz, DMSO):  $\delta$  180.7 (CS), 163.7 ( $C4$ ), 150.5 ( $C2$ ), 136.1 ( $C6$ ), 138.8, 131.2,

## SUPPORTING INFORMATION

124.7 (*C*-Ph), 109.8 (*C*5), 84.1 (*C*1'), 83.9 (*C*4'), 71.3 (*C*3'), 40.0 (*C*5'), 38.2 (*C*2'), 12.3 (*CH*3); LCMS (ES<sup>+</sup>): *m/z* (%) 455 (100) [M+H]<sup>+</sup>; HRMS (ES<sup>+</sup>): calcd for C<sub>17</sub>H<sub>20</sub>BrN<sub>4</sub>O<sub>4</sub>S<sub>1</sub> [M+H]<sup>+</sup> 455.0383 *m/z*, found 455.0393 *m/z* (-2.12 ppm).

***N*-(5'-deoxy-β-thymidin-5'-yl)-*N'*-(2-methoxy-phenyl)urea (49):** 2-Methoxyphenyl isocyanate reacted with amine **33** to yield compound **49** as a solid; <sup>1</sup>H-NMR (500MHz, DMSO): δ 11.33 (s, 1H, NH), 8.09 (qt, *J* = 3.16 Hz, 1H, NH), 8.03 (s, 1H, NH), 7.51 (d, *J* = 0.8 Hz, 1H, *H*6), 7.07 (t, *J* = 5.80 Hz, 1H, *H*-Ph), 6.89-6.96 (m, 1H, *H*-Ph), 6.81-6.89 (m, 2H, *H*-Ph), 6.19 (qt, *J* = 4.66 Hz, 1H, *H*1'), 5.35 (d, *J* = 4.30 Hz, 1H, OH), 4.14-4.17 (m, 1H, *H*3'), 3.74-3.77 (m, 1H, *H*4'), 3.45-3.50 (m, 1H, *H*5'), 3.36 (s, 3H, CH<sub>3</sub>), 3.20-3.25 (m, 1H, *H*5'), 2.14-2.19 (m, 1H, *H*2'), 2.05-2.09 (m, 1H, *H*2'), 1.77 (s, 3H, CH<sub>3</sub>); <sup>13</sup>C-NMR (125MHz, DMSO): δ 163.7 (*C*4), 155.2 (CO), 150.5 (*C*2), 147.3 (*C*-Ph), 136.0 (*C*6), 129.3, 121.0, 120.4, 117.9, 110.5 (*C*-Ph), 109.8 (*C*6), 85.4 (*C*1'), 83.6 (*C*4'), 71.1 (*C*3'), 55.6 (CH<sub>3</sub>), 41.3 (*C*5'), 38.4 (*C*2'), 12.0 (CH<sub>3</sub>); LCMS (ES<sup>+</sup>): *m/z* (%) 391 (100) [M+H]<sup>+</sup>; HRMS (ES<sup>+</sup>): calcd for C<sub>18</sub>H<sub>23</sub>N<sub>4</sub>O<sub>6</sub> [M+H]<sup>+</sup> 391.1612 *m/z*, found 391.1614 *m/z* (-0.57 ppm).

***N*-(5'-deoxy-β-thymidin-5'-yl)-*N'*-(3-methoxy-phenyl)urea (50):** 3-Methoxyphenyl isocyanate reacted with amine **33** to yield compound **50** as a solid; <sup>1</sup>H-NMR (500MHz, DMSO): δ 11.33 (s, 1H, NH), 8.55 (s, 1H, NH), 7.52 (s, 1H, *H*6), 7.09-7.15 (m, 2H, *H*-Ph), 6.84 (t, *J* = 4.52 Hz, 1H, *H*-Ph), 6.47 (qt, *J* = 3.40 Hz, 1H, *H*-Ph), 6.29 (t, *J* = 5.82 Hz, 1H, NH), 6.18 (t, *J* = 7.0 Hz, 1H, *H*1'), 5.35 (d, *J* = 4.20 Hz, 1H, OH), 4.16-4.17 (m, 1H, *H*3'), 3.75-3.78 (m, 1H, *H*4'), 3.70 (s, 3H, CH<sub>3</sub>), 3.43-3.48 (m, 1H, *H*5'), 3.20-3.25 (m, 1H, *H*5'), 2.13-2.19 (m, 1H, *H*2'), 2.04-2.09 (m, 1H, *H*2'), 1.78 (s, 3H, CH<sub>3</sub>); <sup>13</sup>C-NMR (125MHz, DMSO): δ 163.7 (*C*4), 159.6 (CO), 155.1 (*C*2), 150.5, 141.6 (*C*-Ph), 136.1 (*C*6), 129.4, 109.9, 109.8, 106.5 (*C*-Ph), 103.3 (*C*5), 85.3 (*C*1'), 83.7 (*C*4'), 71.1 (*C*3'), 54.8 (CH<sub>3</sub>), 41.4 (*C*5'), 38.4 (*C*2'), 12.0 (CH<sub>3</sub>); LCMS (ES<sup>+</sup>): *m/z* (%) 391 (100) [M+H]<sup>+</sup>; HRMS (ES<sup>+</sup>): calcd for C<sub>18</sub>H<sub>23</sub>N<sub>4</sub>O<sub>6</sub> [M+H]<sup>+</sup> 391.1612 *m/z*, found 391.1615 *m/z* (-0.78 ppm).

***N*-(5'-deoxy-β-thymidin-5'-yl)-*N'*-(4-methoxy-phenyl)urea (51):** 4-Methoxyphenyl isocyanate reacted with amine **33** to yield compound **51** as a solid; <sup>1</sup>H-NMR (500MHz, DMSO): δ 11.33 (s, 1H, NH), 8.32 (s, 1H, NH), 7.52 (d, *J* = 1.00 Hz, 1H, *H*6), 7.28 (qt, *J* = 3.0 Hz, 2H, *H*-Ph), 6.81 (qt, *J* = 3.00 Hz, 2H, *H*-Ph), 6.17-6.20 (m, 2H, NH and *H*1'), 5.34 (d, *J* = 4.25 Hz, 1H, OH), 4.14-4.18 (m, 1H, *H*3'), 3.75-3.78 (m, 1H, *H*4'), 3.43-3.48 (m, 1H, *H*5'), 3.36 (s, 3H, CH<sub>3</sub>), 3.19-3.24 (m, 1H, *H*5'), 2.13-2.18 (m, 1H, *H*2'), 2.05-2.09 (m, 1H, *H*2'), 1.78 (s, 3H, CH<sub>3</sub>); <sup>13</sup>C-NMR (125MHz,

SUPPORTING INFORMATION

DMSO):  $\delta$  163.7 (*C4*), 155.4 (*CO*), 153.9 (*C-Ph*), 150.5 (*C2*), 136.0 (*C6*), 133.5 (*C-Ph*), 119.3, 113.8 (*C-Ph*), 109.8 (*C5*), 85.4 (*CI'*), 83.7 (*C4'*), 71.1 (*C3'*), 55.4 (*CH<sub>3</sub>*), 41.4 (*C5'*), 38.4 (*C2'*), 12.0 (*CH<sub>3</sub>*); LCMS ( $ES^+$ ):  $m/z$  (%) 391 (100)  $[M+H]^+$ ; HRMS ( $ES^+$ ): calcd for  $C_{18}H_{23}N_4O_6$   $[M+H]^+$  391.1612  $m/z$ , found 391.1599  $m/z$  (3.43 ppm).

***N*-(5'-deoxy- $\beta$ -thymidin-5'-yl)-*N'*-(4-*tert*-butyl-phenyl)urea (52):** 4-*tert*-Butylphenyl isocyanate reacted with amine **33** to yield compound **52** as a solid;  $^1H$ -NMR (500MHz, DMSO):  $\delta$  11.33 (s, 1H, *NH*), 8.43 (s, 1H, *NH*), 7.52 (d,  $J = 1.1$  Hz, 1H, *H6*), 7.28-7.30 (m, 2H, *H-Ph*), 7.22-7.24 (m, 2H, *H-Ph*), 6.24 (t,  $J = 5.90$  Hz, 1H, *NH*), 6.18 (qt,  $J = 4.70$  Hz, 1H, *HI'*), 5.34 (d,  $J = 4.25$  Hz, 1H, *OH*), 4.16 (qt,  $J = 3.18$  Hz, 1H, *H3'*), 3.75-3.78 (m, 1H, *H4'*), 3.43-3.49 (m, 1H, *H5'*), 3.19-3.24 (m, 1H, *H5'*), 2.13-2.19 (m, 1H, *H2'*), 2.04-2.09 (m, 1H, *H2'*), 1.78 (s, 3H, *CH<sub>3</sub>*);  $^{13}C$ -NMR (125MHz, DMSO):  $\delta$  163.7 (*C4*), 155.3 (*CO*), 150.5 (*C2*), 143.3, 173.7 (*C-Ph*), 136.1 (*C6*), 125.2, 117.4 (*C-Ph*), 109.8 (*C5*), 85.4 (*CI'*), 83.7 (*C4'*), 71.1 (*C3'*), 41.4 (*C5'*), 38.4 (*C2'*), 33.8 (*C(CH<sub>3</sub>)<sub>3</sub>*), 31.2 (*CH<sub>3</sub>*), 12.0 (*CH<sub>3</sub>*); LCMS ( $ES^+$ ):  $m/z$  (%) 417 (100)  $[M+H]^+$ ; HRMS ( $ES^+$ ): calcd for  $C_{21}H_{29}N_4O_5$   $[M+H]^+$  417.2132  $m/z$ , found 417.2131  $m/z$  (0.39 ppm).

***N*-(5'-deoxy- $\beta$ -thymidin-5'-yl)-*N'*-(3-trifluoromethyl-4-chloro-phenyl)thiourea (53):** 3-Trifluoromethyl-4-chlorophenyl isothiocyanate reacted with amine **33** to yield compound **53** as a solid;  $^1H$ -NMR (500MHz, DMSO):  $\delta$  11.35 (s, 1H, *NH*), 9.99 (s, 1H, *NH*), 8.19 (m, 2H, *NH* and *H-Ph*), 7.72 (d,  $J = 10.80$  Hz, 1H, *H-Ph*), 7.52 (s, 1H, *H6*), 6.20 (t,  $J = 6.35$  Hz, 1H, *HI'*), 5.40 (d,  $J = 4.36$  Hz, 1H, *OH*), 4.23 (m, 1H, *H4'*), 3.94 (m, 2H, *H5'*), 3.62 (m, 1H, *H3'*), 2.21 (m, 1H, *H2'*), 2.08 (m, 1H, *H2'*), 1.78 (s, 3H, *CH<sub>3</sub>*);  $^{19}F$ -NMR (470MHz, DMSO):  $\delta$  61.47; LCMS ( $ES^+$ ):  $m/z$  (%) 479 (100)  $[M+H]^+$ ; HRMS ( $ES^+$ ): calcd for  $C_{18}H_{19}ClF_3N_4O_4S_1$   $[M+H]^+$  479.0762  $m/z$ , found 479.0775  $m/z$  (-2.68 ppm).

***N*-(5'-deoxy- $\beta$ -thymidin-5'-yl)-*N'*-(3-trifluoromethyl-4-chlorophenyl)urea (54):** 3-Trifluoromethyl-4-chlorophenyl isocyanate reacted with amine **33** to yield compound **54** as a solid;  $^1H$ -NMR (500MHz, DMSO):  $\delta$  11.35 (s, 1H, *NH*), 9.05 (s, 1H, *NH*), 8.10 (d,  $J = 2.20$  Hz, 1H, *H6*), 7.52-7.56 (m, 3H, *H-Ph*), 6.50 (t,  $J = 5.90$  Hz, 1H, *NH*), 6.18 (qt,  $J = 4.70$  Hz, 1H, *HI'*), 5.35 (d,  $J = 4.25$  Hz, 1H, *OH*), 4.15-4.18 (m, 1H, *H3'*), 3.78-3.81 (m, 1H, *H4'*), 3.43-3.48 (m, 1H, *H5'*), 3.23-3.28 (m, 1H, *H5'*), 2.13-2.18, 2.04-2.09 (m, 2H, *H2'*), 1.76 (s, 3H, *CH<sub>3</sub>*);  $^{13}C$ -NMR (125MHz, DMSO):  $\delta$  163.7 (*C4*), 154.9 (*CO*), 150.5 (*C2*), 136.1 (*C6*), 140.0, 131.9, 126.7, 122.3, 121.4, 116.0 (*C-Ph*), 109.7 (*C5*), 85.1 (*CI'*), 83.8 (*C4'*), 71.1 (*C3'*), 41.5 (*C5'*), 38.3 (*C2'*), 12.3 (*CH<sub>3</sub>*); LCMS

## SUPPORTING INFORMATION

(ES<sup>+</sup>): *m/z* (%) 463 (100) [M+H]<sup>+</sup>; HRMS (ES<sup>+</sup>): calcd for C<sub>18</sub>H<sub>19</sub>ClF<sub>3</sub>N<sub>4</sub>O<sub>5</sub> [M+H]<sup>+</sup> 463.0991 *m/z*, found 463.0977 *m/z* (2.85 ppm).

***N*-(5'-deoxy-β-thymidin-5'-yl)-*N'*-(4-nitro-phenyl)urea (55):** 4-Nitrophenyl isocyanate reacted with amine **33** to yield compound **55** as a solid; <sup>1</sup>H-NMR (500MHz, DMSO): δ 11.34 (s, 1H, NH), 9.34 (s, 1H, NH), 8.15 (d, *J* = 12.14 Hz, 2H, *H*-Ph), 7.62 (d, *J* = 11.97 Hz, 2H, *H*-Ph), 7.51 (s, 1H, *H*6), 6.61 (t, *J* = 6.00 Hz, NH), 6.19 (t, *J* = 7.53 Hz, *H*1'), 5.37 (d, *J* = 17.05 Hz, OH), 4.17 (m, 1H, *H*3'), 3.79 (m, 1H, *H*4'), 3.50 (m, 1H, *H*5'), 3.26 (m, 1H, *H*5'), 2.19 (m, 1H, *H*2'), 2.08 (m, 1H, *H*2'), 1.78 (s, 3H, CH<sub>3</sub>); <sup>13</sup>C-NMR (125MHz, DMSO): δ 163.7 (*C*4), 154.5 (*CO*), 150.5 (*C*2'), 147.0 (*C*-Ph), 140.4 (*C*-Ph), 136.1 (*C*6), 125.2 (*C*-Ph), 116.8 (*C*-Ph), 109.8 (*C*5), 85.0 (*C*1'), 83.7 (*C*4'), 71.1 (*C*3'), 41.5 (*C*5'), 38.3 (*C*2'), 12.1 (CH<sub>3</sub>); LCMS (ES<sup>+</sup>): *m/z* (%) 406 (100) [M+H]<sup>+</sup>; HRMS (ES<sup>+</sup>): calcd for C<sub>17</sub>H<sub>20</sub>N<sub>5</sub>O<sub>7</sub> [M+H]<sup>+</sup> 406.1357 *m/z*, found 406.1374 *m/z* (-4.17 ppm).

### General Procedure for compounds 56 – 69

For the synthesis of compounds **56 – 69**, compound of amine **8** (1eq.) was dissolved in DMF at 0 °C. The coupling reagents (1.1 eq.) were added and the reaction mixture was allowed to stir at room temperature for 3 h. After the completion of the reaction, the reaction mixture was evaporated to dry (ethanol and toluene were used to co-evaporate) and the residue was purified by column chromatography to yield the compounds **56 – 69** as a solid with the yields ranging from 41 % to 91 %.

***N*-(5'-deoxy-α-thymidin-5'-yl)-*N'*-(2-phenylphenyl)urea (56):** 2-Phenylphenyl isocyanate reacted with amine **8** to yield compound **56** as a solid; <sup>1</sup>H-NMR (500MHz, DMSO): δ 11.23 (s, 1H, NH), 7.88 (qt, *J* = 3.05 Hz, 1H, NH), 7.76 (d, *J* = 1.15 Hz, 1H, *H*6), 7.05-7.89 (m, 9H, *H*-Ph), 6.72 (t, *J* = 5.80 Hz, 1H, NH), 6.14 (qt, *J* = 3.73 Hz, 1H, *H*1'), 5.41 (d, *J* = 1.85 Hz, 1H, OH), 4.15-4.17 (m, 2H, *H*3' and *H*4'), 3.20-3.25, 3.08-3.13 (m, 2H, *H*5'), 2.52-2.57 (m, 1H, *H*2'), 1.91-1.95 (m, 1H, *H*2'), 1.78 (s, 3H, CH<sub>3</sub>); <sup>13</sup>C-NMR (125MHz, DMSO): δ 163.8 (*C*4), 155.6 (*CO*), 150.5 (*C*2), 136.4 (*C*6), 138.7, 136.9, 132.3, 130.1, 129.1, 128.7, 127.6, 127.3, 122.6, 122.5 (*C*-Ph), 108.8 (*C*5), 87.1 (*C*1'), 84.7 (*C*4'), 70.9 (*C*3'), 41.2 (*C*5'), 39.0 (*C*2'), 12.3 (CH<sub>3</sub>); LCMS (ES<sup>+</sup>): *m/z* (%) 437 (100) [M+H]<sup>+</sup>; HRMS (ES<sup>+</sup>): calcd for C<sub>23</sub>H<sub>25</sub>N<sub>4</sub>O<sub>5</sub> [M+H]<sup>+</sup> 437.1819 *m/z*, found 437.1811 *m/z* (1.92 ppm).

***N*-(5'-deoxy-α-thymidin-5'-yl)-*N'*-(4-phenylphenyl)urea (57):** 4-Phenylphenyl isocyanate reacted with amine **8** to yield compound **57** as a solid; <sup>1</sup>H-NMR (500MHz, DMSO): δ 11.25 (s, 1H, NH),

## SUPPORTING INFORMATION

8.66 (s, 1H, NH), 7.78 (d,  $J = 1.15$  Hz, 1H,  $H_6$ ), 7.28-7.62 (m, 9H,  $H$ -Ph), 6.30 (t,  $J = 5.85$  Hz, 1H, NH), 6.20 (qt,  $J = 3.75$  Hz, 1H,  $H_{I'}$ ), 5.44 (d,  $J = 3.25$  Hz, 1H, OH), 4.18-4.23 (m, 2H,  $H_{3'}$  and  $H_{4'}$ ), 3.26-3.30, 3.12-3.18 (m, 2H,  $H_{5'}$ ), 2.57-2.62 (m, 1H,  $H_{2'}$ ), 1.93-1.97 (m, 1H,  $H_{2'}$ ), 1.79 (s, 3H,  $CH_3$ );  $^{13}C$ -NMR (125MHz, DMSO):  $\delta$  163.8 ( $C_4$ ), 155.1 (CO), 150.5 ( $C_2$ ), 136.9 ( $C_6$ ), 139.9, 132.8, 128.8, 126.9, 126.6, 126.0, 118.0 ( $C$ -Ph), 108.8 ( $C_5$ ), 86.8 ( $C_{I'}$ ), 84.7 ( $C_{4'}$ ), 70.9 ( $C_{3'}$ ), 41.1 ( $C_{5'}$ ), 39.0 ( $C_{2'}$ ), 12.3 ( $CH_3$ ); LCMS ( $ES^+$ ):  $m/z$  (%) 437 (100)  $[M+H]^+$ ; HRMS ( $ES^+$ ): calcd for  $C_{23}H_{25}N_4O_5$   $[M+H]^+$  437.1819  $m/z$ , found 437.1821  $m/z$  (-0.35 ppm).

***N*-(5'-deoxy- $\alpha$ -thymidin-5'-yl)-*N'*-(3-(phenoxy)methyl)phenyl urea (58):** 3-(Phenoxy)methylphenyl isocyanate reacted with amine **8** to yield compound **58** as a solid;  $^1H$ -NMR (500MHz, DMSO):  $\delta$  11.29 (s, 1H, NH), 8.63 (s, 1H, NH), 7.78 (d,  $J = 1.15$  Hz, 1H,  $H_6$ ), 7.49 (s, 1H,  $H$ -Ph), 7.22-7.35 (m, 4H,  $H$ -Ph), 6.92-7.00 (m, 4H,  $H$ -Ph), 6.27 (t,  $J = 5.87$  Hz, 1H, NH), 6.18 (qt,  $J = 3.73$  Hz, 1H,  $H_{I'}$ ), 5.45 (d,  $J = 3.30$  Hz, 1H, OH), 5.04 (s, 2H,  $CH_2$ ), 4.16-4.21 (m, 2H,  $H_{3'}$  and  $H_{4'}$ ), 3.23-3.28 (m, 1H,  $H_{5'}$ ), 3.09-3.15 (m, 1H,  $H_{5'}$ ), 2.55-2.60 (m, 1H,  $H_{2'}$ ), 1.92-1.96 (m, 1H,  $H_{2'}$ ), 1.78 (s, 3H,  $CH_3$ );  $^{13}C$ -NMR (125MHz, DMSO):  $\delta$  163.8 ( $C_4$ ), 155.1 (CO), 150.5 ( $C_2$ ), 158.3, 140.5, 137.7, 129.5, 128.8, 120.6, 120.27, 117.0, 116.5, 114.7 ( $C$ -Ph), 136.9 ( $C_6$ ), 108.8 ( $C_5$ ), 86.9 ( $C_{I'}$ ), 84.6 ( $C_{4'}$ ), 70.8 ( $C_{3'}$ ), 69.1 ( $CH_2$ ), 41.0 ( $C_{5'}$ ), 39.0 ( $C_{2'}$ ), 12.3 ( $CH_3$ ); LCMS ( $ES^+$ ):  $m/z$  (%) 467 (100)  $[M+H]^+$ ; HRMS ( $ES^+$ ): calcd for  $C_{24}H_{27}N_4O_6$   $[M+H]^+$  467.1925  $m/z$ , found 467.1929  $m/z$  (-0.76 ppm).

***N*-(5'-deoxy- $\alpha$ -thymidin-5'-yl)-*N'*-(2-(phenoxy)methyl)phenyl urea (59):** 2-(Phenoxy)methylphenyl isocyanate reacted with amine **8** to yield compound **59** as a solid;  $^1H$ -NMR (500MHz, DMSO):  $\delta$  11.28 (s, 1H, NH), 7.94 (s, 1H, NH), 7.85 (d,  $J = 7.60$  Hz, 1H, NH), 7.79 (d,  $J = 1.15$  Hz, 1H,  $H_6$ ), 7.39 (qt,  $J = 3.00$  Hz, 1H,  $H$ -Ph), 7.25-7.32 (m, 3H,  $H$ -Ph), 6.88-7.03 (m, 5H,  $H$ -Ph), 6.19 (qt,  $J = 3.75$  Hz, 1H,  $H_{I'}$ ), 5.47 (d,  $J = 3.20$  Hz, 1H, OH), 5.04 (s, 2H,  $CH_2$ ), 4.17-4.22 (m, 2H,  $H_{3'}$  and  $H_{4'}$ ), 3.26-3.31 (m, 1H,  $H_{5'}$ ), 3.09-3.18 (m, 1H,  $H_{5'}$ ), 2.54-2.60 (m, 1H,  $H_{2'}$ ), 1.92-1.96 (m, 1H,  $H_{2'}$ ), 1.78 (s, 3H,  $CH_3$ );  $^{13}C$ -NMR (125MHz, DMSO):  $\delta$  163.8 ( $C_4$ ), 155.4 (CO), 150.5 ( $C_2$ ), 158.3, 141.1, 138.0, 129.4, 129.3, 128.4, 126.3, 122.2, 121.6, 120.7 ( $C$ -Ph), 136.9 ( $C_6$ ), 108.8 ( $C_5$ ), 87.0 ( $C_{I'}$ ), 84.6 ( $C_{4'}$ ), 70.9 ( $C_{3'}$ ), 66.3 ( $CH_2$ ), 41.2 ( $C_{5'}$ ), 39.0 ( $C_{2'}$ ), 12.3 ( $CH_3$ ); LCMS ( $ES^+$ ):  $m/z$  (%) 467 (100)  $[M+H]^+$ ; HRMS ( $ES^+$ ): calcd for  $C_{24}H_{27}N_4O_6$   $[M+H]^+$  467.1925  $m/z$ , found 467.1921  $m/z$  (0.93 ppm).

***N*-(5'-deoxy- $\alpha$ -thymidin-5'-yl)-*N'*-(4-benzyloxyphenyl)urea (60):** 4-Benzyloxyphenyl isocyanate reacted with amine **8** to yield compound **60** as a solid;  $^1H$ -NMR (500MHz, DMSO):  $\delta$  11.29 (s, 1H,

## SUPPORTING INFORMATION

NH), 8.37 (s, 1H, NH), 7.78 (s, 1H, H6), 7.28-7.44 (m, 7H, H-Ph), 6.90 (d,  $J = 9.01$  Hz, 2H, H-Ph), 6.18 (m, 2H, HI' and NH), 5.45 (d,  $J = 3.16$  Hz, 1H, OH), 5.03 (s, 2H, CH<sub>2</sub>-Ph), 4.19 (m, 2H, H3' and H4'), 3.24 (m, 1H, H5'), 3.11 (m, 1H, H5'), 2.57 (m, 1H, H2'), 1.93 (m, 1H, H2'), 1.78 (s, 3H, CH<sub>3</sub>); <sup>13</sup>C-NMR (125MHz, DMSO):  $\delta$  163.9 (C4), 155.4 (CO), 150.5 (C2), 137.3 (C6), 153.0, 133.7, 128.4, 127.7, 119.3, 114.9 (C-Ph), 108.8 (C5), 87.0 (C1'), 84.7 (C4'), 79.1 (C3'), 70.8 (CH<sub>2</sub>-Ph), 69.3 (C5'), 41.04 (C2'), 12.3 (CH<sub>3</sub>); LCMS (ES<sup>+</sup>): m/z (%) 467 (100) [M+H]<sup>+</sup>; HRMS (ES<sup>+</sup>): calcd for C<sub>24</sub>H<sub>27</sub>N<sub>4</sub>O<sub>6</sub> [M+H]<sup>+</sup> 467.1925  $m/z$ , found 467.1937  $m/z$  (-2.53 ppm).

***N*-(5'-deoxy- $\alpha$ -thymidin-5'-yl)-*N'*-(4-benzyloxyphenyl)thiourea (61):** 4-Benzyloxyphenyl isothiocyanate reacted with amine **8** to yield compound **61** as a solid; <sup>1</sup>H-NMR (500MHz, DMSO):  $\delta$  11.28 (s, 1H, NH), 9.47 (s, 1H, NH), 7.79 (d,  $J = 1.15$  Hz, 1H, H6), 7.59 (s, 1H, NH), 7.25-7.46 (m, 7H, H-Ph), 6.97-6.99 (m, 2H, H-Ph), 6.19 (qt,  $J = 5.46$  Hz, 1H, HI'), 5.48 (d,  $J = 3.15$  Hz, 1H, OH), 4.35 (t,  $J = 5.35$  Hz, 1H, H3'), 4.24 (t,  $J = 2.67$  Hz, 1H, H4'), 3.58-3.62 (m, 1H, H5'), 3.48-3.50 (m, 1H, H5'), 2.56-2.61 (m, 1H, H2'), 1.92 (d,  $J = 14.40$  Hz, 1H, H2'), 1.78 (s, 3H, CH<sub>3</sub>); <sup>13</sup>C-NMR (125MHz, DMSO):  $\delta$  163.8 (C4), 155.6 (CO), 150.5 (C2), 137.0 (C6), 137.1, 128.4, 127.8, 127.7, 125.7, 114.8 (C-Ph), 108.7 (C5), 86.0 (C1'), 84.7 (C4'), 70.8 (C3'), 69.3 (CH<sub>2</sub>), 46.5 (C5'), 39.0 (C2'), 12.36 (CH<sub>3</sub>); LCMS (ES<sup>+</sup>): m/z (%) 483 (100) [M+H]<sup>+</sup>; HRMS (ES<sup>+</sup>): calcd for C<sub>24</sub>H<sub>27</sub>N<sub>4</sub>O<sub>5</sub>S<sub>1</sub> [M+H]<sup>+</sup> 483.1697  $m/z$ , found 483.1688  $m/z$  (1.71 ppm).

***N*-(5'-deoxy- $\alpha$ -thymidin-5'-yl)-*N'*-(4-tetrahydropyran-4-oxyphenyl)urea (62):** 4-tetrahydropyran-4-oxyphenyl isocyanate reacted with amine **8** to yield compound **62** as a solid; <sup>1</sup>H-NMR (500MHz, DMSO):  $\delta$  11.27 (s, 1H, NH), 8.35 (s, 1H, NH), 7.76 (d,  $J = 1.15$  Hz, 1H, H6), 7.24-7.27 (m, 2H, H-Ph), 6.83-6.86 (m, 2H, H-Ph), 6.14-6.17 (m, 2H, NH and HI'), 5.43 (d,  $J = 3.25$  Hz, 1H, OH), 4.39-4.44 (m, 1H, CH), 4.13-4.18 (m, 2H, H3' and H4'), 3.80-3.84 (m, 2H, CH<sub>2</sub>), 3.41-3.46 (m, 2H, CH<sub>2</sub>), 3.19-3.24 (m, 1H, H5'), 3.06-3.11 (m, 1H, H5'), 2.53-2.58 (m, 1H, H2'), 1.89-1.94 (m, 3H, H2' and CH<sub>2</sub>), 1.76 (s, 3H, CH<sub>3</sub>), 1.49-1.56 (m, 2H, CH<sub>2</sub>); <sup>13</sup>C-NMR (125MHz, DMSO):  $\delta$  163.8 (C4), 155.3 (CO), 151.3 (C2), 136.9 (C6), 155.3, 133.8, 119.3, 116.4 (C-Ph), 108.8 (C5), 87.0 (C1'), 84.6 (C4'), 71.7 (C3'), 70.8 (CH), 64.5 (CH<sub>2</sub>), 41.0 (C5'), 39.0 (C2'), 31.8 (CH<sub>2</sub>), 12.3 (CH<sub>3</sub>); LCMS (ES<sup>+</sup>): m/z (%) 461 (100) [M+H]<sup>+</sup>; HRMS (ES<sup>+</sup>): calcd for C<sub>22</sub>H<sub>29</sub>N<sub>4</sub>O<sub>7</sub> [M+H]<sup>+</sup> 461.2031  $m/z$ , found 461.2024  $m/z$  (1.46 ppm).

***N*-(5'-deoxy- $\alpha$ -thymidin-5'-yl)-*N'*-(4-piperdin-1-ylphenyl)urea (63):** 4-Piperdin-1-ylphenyl isocyanate reacted with amine **8** to yield compound **63** as a solid; <sup>1</sup>H-NMR (500MHz, DMSO):  $\delta$  11.28 (s, 1H, NH), 8.25 (s, 1H, NH), 7.77 (d,  $J = 1.20$  Hz, 1H, H6), 7.19-7.22 (m, 2H, H-Ph), 6.80-

## SUPPORTING INFORMATION

6.83 (m, 2H, *H*-Ph), 6.17 (qt,  $J = 3.71$  Hz, 1H, *HI*'), 6.12 (t,  $J = 5.90$  Hz, 1H, *NH*), 5.44 (d,  $J = 3.25$  Hz, 1H, *OH*), 4.15-4.20 (m, 2H, *H3'* and *H4'*), 3.20-3.24 (m, 1H, *H5'*), 3.07-3.12 (m, 1H, *H5'*), 2.99 (t,  $J = 5.42$  Hz, 4H, *CH*<sub>2</sub>), 2.54-2.59 (m, 1H, *H2'*), 1.91-1.95 (m, 1H, *H2'*), 1.78 (s, 3H, *CH*<sub>3</sub>), 1.58-1.63 (m, 4H, *CH*<sub>2</sub>), 1.48-1.51 (m, 2H, *CH*<sub>2</sub>); <sup>13</sup>C-NMR (125MHz, DMSO):  $\delta$  163.8 (*C4*), 155.4 (*CO*), 150.5 (*C2*), 136.9 (*C6*), 146.9, 132.4, 119.0, 116.8 (*C*-Ph), 108.8 (*C5*), 87.0 (*CI*'), 84.6 (*C4'*), 70.8 (*C3'*), 50.6 (*CH*<sub>2</sub>), 41.0 (*C5'*), 39.0 (*C2'*), 25.4 (*CH*<sub>2</sub>), 23.8 (*CH*<sub>2</sub>), 12.3 (*CH*<sub>3</sub>); LCMS (ES<sup>+</sup>): *m/z* (%) 444 (100) [M+H]<sup>+</sup>; HRMS (ES<sup>+</sup>): calcd for C<sub>22</sub>H<sub>30</sub>N<sub>5</sub>O<sub>5</sub> [M+H]<sup>+</sup> 444.2241 *m/z*, found 444.2231 *m/z* (2.31 ppm).

***N*-(5'-deoxy- $\alpha$ -thymidin-5'-yl)-*N'*-(4-(4-methylpiperazin-1-yl)phenyl)urea (64):** 4-(4-Methylpiperazinyl)phenyl isocyanate reacted with amine **8** to yield compound **64** as a solid; <sup>1</sup>H-NMR (500MHz, DMSO):  $\delta$  11.28 (s, 1H, *NH*), 8.27 (s, 1H, *NH*), 7.79 (d,  $J = 1.10$  Hz, 1H, *H6*), 7.20-7.31 (m, 2H, *H*-Ph), 6.82-6.91 (m, 2H, *H*-Ph), 6.17 (qt,  $J = 3.75$  Hz, 1H, *HI*'), 6.12 (t,  $J = 5.87$  Hz, 1H, *NH*), 5.46 (d,  $J = 3.34$  Hz, 1H, *OH*), 4.17-4.22 (m, 2H, *H3'* and *H4'*), 3.20-3.27 (m, 1H, *H5'*), 3.07-3.14 (m, 1H, *H5'*), 2.99 (m, 4H, *CH*<sub>2</sub>), 2.54-2.59 (m, 1H, *H2'*), 2.42-2.51 (m, 4H, *CH*<sub>2</sub>), 2.17-2.23 (s, 3H, *CH*<sub>3</sub>), 1.91-1.97 (m, 1H, *H2'*), 1.78 (s, 3H, *CH*<sub>3</sub>); <sup>13</sup>C-NMR (125MHz, DMSO):  $\delta$  163.8 (*C4*), 155.4 (*CO*), 150.5 (*C2*), 136.9 (*C6*), 146.0, 132.5, 132.0, 119.4, 119.0, 116.2, 116.1 (*C*-Ph), 108.8 (*C5*), 87.0 (*CI*'), 84.6 (*C4'*), 79.2 (*CH*<sub>2</sub>), 70.8 (*C3'*), 54.7 (*CH*<sub>2</sub>), 48.9, 48.9 (*CH*<sub>2</sub>), 45.8 (*C5'*), 41.0 (*C2'*), 12.3 (*CH*<sub>3</sub>); LCMS (ES<sup>+</sup>): *m/z* (%) 459 (100) [M+H]<sup>+</sup>; HRMS (ES<sup>+</sup>): calcd for C<sub>22</sub>H<sub>31</sub>N<sub>6</sub>O<sub>5</sub> [M+H]<sup>+</sup> 459.2350 *m/z*, found 459.2361 *m/z* (-2.31 ppm).

***N*-(5'-deoxy- $\alpha$ -thymidin-5'-yl)-*N'*-(4-(6-methyl-2-benzothiazolyl)phenyl) urea (65):** 4-(6-Methyl-2-benzothiazolyl)phenyl isocyanate reacted with amine **8** to yield compound **65** as a solid; <sup>1</sup>H-NMR (500MHz, DMSO):  $\delta$  11.17 (s, 1H, *NH*), 8.86 (s, 1H, *NH*), 7.81-7.83, 7.74-7.77 (m, 4H, *H*-Ph), 7.67 (d,  $J = 1.15$  Hz, 1H, *H6*), 7.46 (qt,  $J = 2.93$  Hz, 2H, *H*-Ph), 7.21 (qt,  $J = 3.16$  Hz, 2H, *H*-Ph), 6.32 (t,  $J = 5.34$  Hz, 1H, *NH*), 6.08 (qt,  $J = 3.75$  Hz, 1H, *HI*'), 5.36 (d,  $J = 3.30$  Hz, 1H, *OH*), 4.07-4.10 (m, 2H, *H3'* and *H4'*), 3.15-3.20 (m, 1H, *H5'*), 3.00-3.05 (m, 1H, *H3'*), 2.44-2.51 (m, 1H, *H2'*), 2.33 (s, 3H, *CH*<sub>3</sub>), 1.81-1.86 (m, 1H, *H2'*), 1.66 (s, 3H, *CH*<sub>3</sub>); <sup>13</sup>C-NMR (125MHz, DMSO):  $\delta$  163.8 (*C4*), 150.5 (*C2*), 154.8, 151.8, 143.3, 134.7, 134.2, 127.9, 125.7, 121.9, 117.6 (*C*-Ph), 136.9 (*C6*), 108.9 (*C5*), 86.7 (*CI*'), 84.6 (*C4'*), 70.8 (*C3'*), 41.0 (*C5'*), 39.0 (*C2'*), 21.0 (*CH*<sub>3</sub>), 12.3 (*CH*<sub>3</sub>); LCMS (ES<sup>+</sup>): *m/z* (%) 508 (100) [M+H]<sup>+</sup>; HRMS (ES<sup>+</sup>): calcd for C<sub>25</sub>H<sub>26</sub>N<sub>5</sub>O<sub>5</sub>S<sub>1</sub> [M+H]<sup>+</sup> 508.1649 *m/z*, found 508.1658 *m/z* (-1.82 ppm).



## SUPPORTING INFORMATION

***N*-(5'-deoxy- $\alpha$ -thymidin-5'-yl)-*N'*-(4-phenyloxyphenyl) urea (66):** 4-Phenyloxyphenyl isocyanate reacted with amine **8** to yield compound **66** as a solid;  $^1\text{H-NMR}$  (500MHz, DMSO):  $\delta$  11.25 (s, 1H, NH), 8.56 (s, 1H, NH), 7.78 (d,  $J = 1.15$  Hz, 1H, *H6*), 7.39-7.42, 7.33-7.37 (m, 4H, *H-Ph*), 7.05-7.09 (m, 1H, *H-Ph*), 6.92-6.95 (m, 4H, *H-Ph*), 6.24 (t,  $J = 5.85$  Hz, 1H, NH), 6.19 (qt,  $J = 3.73$  Hz, 1H, *H1'*), 5.43 (d,  $J = 3.25$  Hz, 1H, OH), 4.17-4.22 (m, 2H, *H3'* and *H4'*), 3.24-3.29, 3.10-3.18 (m, 2H, *H5'*), 2.57-2.61 (m, 1H, *H2'*), 1.92-1.97 (m, 1H, *H2'*), 1.79 (s, 3H,  $\text{CH}_3$ );  $^{13}\text{C-NMR}$  (125MHz, DMSO):  $\delta$  163.8 (*C4*), 155.2 (*CO*), 150.5 (*C2*), 136.5 (*C6*), 157.8, 150.0, 136.9, 129.8, 122.6, 119.8, 119.2, 117.4 (*C-Ph*), 108.8 (*C5*), 86.9 (*C1'*), 84.7 (*C4'*), 70.9 (*C3'*), 41.1 (*C5'*), 39.0 (*C2'*), 12.3 ( $\text{CH}_3$ ); LCMS ( $\text{ES}^+$ ):  $m/z$  (%) 453 (100)  $[\text{M}+\text{H}]^+$ ; HRMS ( $\text{ES}^+$ ): calcd for  $\text{C}_{23}\text{H}_{25}\text{N}_4\text{O}_6$   $[\text{M}+\text{H}]^+$  453.1769  $m/z$ , found 453.1756  $m/z$  (2.76 ppm).

***N*-(5'-deoxy- $\alpha$ -thymidin-5'-yl)-*N'*-(4-morpholino-1-yl-phenyl) thiourea (67):** 4-Morpholinophenyl isothiocyanate reacted with amine **8** to yield compound **67** as a solid;  $^1\text{H-NMR}$  (500MHz, DMSO):  $\delta$  11.25 (s, 1H, NH), 9.40 (s, 1H, NH), 7.78 (d,  $J=1.15$  Hz, 1H, *H6*), 7.50 (s, 1H, NH), 7.20 (d,  $J = 8.90$  Hz, 2H, *H-Ph*), 6.91 (d,  $J = 9.05$  Hz, 2H, *H-Ph*), 6.18 (qt,  $J = 3.61$  Hz, 1H, *H1'*), 5.45 (d,  $J = 3.30$  Hz, 1H, OH), 4.34-4.37 (m, 1H, *H3'*), 4.23-4.26 (m, 1H, *H4'*), 3.73 (t,  $J = 4.80$  Hz, 4H,  $\text{CH}_2$ ), 3.60-3.63, 3.47-3.52 (m, 2H, *H5'*), 3.08 (t,  $J = 4.82$  Hz, 4H,  $\text{CH}_2$ ), 2.56-2.61, 1.90-1.94 (m, 2H, *H2'*), 1.78 (s, 3H,  $\text{CH}_3$ );  $^{13}\text{C-NMR}$  (125MHz, DMSO):  $\delta$  180.8 (*CS*), 163.8 (*C4*), 150.5 (*C2*), 137.0 (*C6*), 148.4, 125.2, 115.2 (*C-Ph*), 108.7 (*C5*), 86.0 (*C1'*), 84.7 (*C4'*), 70.8 (*C3'*), 66.1 ( $\text{CH}_2$ ), 48.6 ( $\text{CH}_2$ ), 45.5 (*C5'*), 39.0 (*C2'*), 12.3 ( $\text{CH}_3$ ); LCMS ( $\text{ES}^+$ ):  $m/z$  (%) 462 (100)  $[\text{M}+\text{H}]^+$ ; HRMS ( $\text{ES}^+$ ): calcd for  $\text{C}_{21}\text{H}_{28}\text{N}_5\text{O}_5\text{S}_1$   $[\text{M}+\text{H}]^+$  462.1806  $m/z$ , found 462.1794  $m/z$  (2.48 ppm).

***N*-(5'-deoxy- $\alpha$ -thymidin-5'-yl)-*N'*-(4-benzylphenyl) urea (68) :** 4-Phenyloxyphenyl isocyanate reacted with amine **8** to yield compound **68** as a solid;  $^1\text{H-NMR}$  (500MHz, DMSO):  $\delta$  11.28 (s, 1H, NH), 8.48 (s, 1H, NH), 7.07-7.30 (m, 9H, *H-Ph*), 6.22 (t,  $J = 5.82$  Hz, 1H, NH), 6.18 (qt,  $J = 3.71$  Hz, 1H, *H1'*), 5.45 (d,  $J = 3.25$  Hz, 1H, OH), 4.15-4.20 (m, 2H, *H3'* and *H4'*), 3.84 (s, 2H,  $\text{CH}_2$ ), 3.21-3.26, 3.08-3.13 (m, 2H, *H5'*), 2.54-2.59, 1.91-1.95 (m, 2H, *H2'*), 1.78 (s, 3H,  $\text{CH}_3$ );  $^{13}\text{C-NMR}$  (125MHz, DMSO):  $\delta$  163.8 (*C4*), 155.2 (*CO*), 150.5 (*C2*), 136.9 (*C6*), 141.7, 138.3, 133.9, 128.9, 128.5, 128.3, 125.8, 117.8 (*C-Ph*), 108.8 (*C5*), 86.9 (*C1'*), 84.6 (*C4'*), 70.8 (*C3'*), 41.0 ( $\text{CH}_2$ ), 40.4 (*C5'*), 39.0 (*C2'*), 12.3 ( $\text{CH}_3$ ); LCMS ( $\text{ES}^+$ ):  $m/z$  (%) 451 (100)  $[\text{M}+\text{H}]^+$ ; HRMS ( $\text{ES}^+$ ): calcd for  $\text{C}_{24}\text{H}_{27}\text{N}_4\text{O}_5$   $[\text{M}+\text{H}]^+$  451.1976  $m/z$ , found 451.1965  $m/z$  (2.35 ppm).

***N*-(5'-deoxy- $\alpha$ -thymidin-5'-yl)-*N'*-(4-(6-(trifluoromethyl)pyridin-3-yl)phenyl) urea (69)**: 4-(6-(Trifluoromethyl)pyridin-3-yl)phenyl isocyanate reacted with amine **8** to yield compound **69** as a solid;  $^1\text{H-NMR}$  (500MHz, DMSO):  $\delta$  11.28 (s, 1H, NH), 8.97 (t,  $J = 1.12$  Hz, 1H, *H*-Ph), 8.88 (s, 1H, NH), 8.21 (qt,  $J = 3.51$  Hz, 1H, *H*-Ph), 8.08-8.12 (m, 3H, *H*-Ph), 7.79 (t,  $J = 1.12$  Hz, 1H, *H6*), 7.56 (d,  $J = 8.85$  Hz, 2H, *H*-Ph), 6.40 (t,  $J = 5.70$  Hz, 1H, NH), 6.20 (qt,  $J = 3.75$  Hz, 1H, *H1'*), 5.48 (d,  $J = 3.30$  Hz, 1H, OH), 4.18-4.23 (m, 2H, *H3'* and *H4'*), 3.26-3.31, 3.12-3.17 (m, 2H, *H5'*), 2.56-2.62, 1.93-1.97(m, 2H, *H2'*), 1.78 (s, 3H,  $\text{CH}_3$ );  $^{13}\text{C-NMR}$  (125MHz, DMSO):  $\delta$  163.8 (*C4*), 155.9 (CO), 150.5 (*C2*), 136.9 (*C6*), 159.5, 129.7, 127.8, 119.2, 117.5 (*C*-Ph), 108.9 (*C5*), 86.7 (*C1'*), 84.6 (*C4'*), 70.8 (*C3'*), 41.0 (*C5'*), 39.0 (*C2'*), 12.3 ( $\text{CH}_3$ ); LCMS ( $\text{ES}^+$ ):  $m/z$  (%) 506 (100) [ $\text{M}+\text{H}$ ] $^+$ ; HRMS ( $\text{ES}^+$ ): calcd for  $\text{C}_{23}\text{H}_{23}\text{F}_3\text{N}_5\text{O}_5$  [ $\text{M}+\text{H}$ ] $^+$  506.1646  $m/z$ , found 506.1636  $m/z$  (1.91 ppm).

### General Procedure for compounds **70** – **79**

For the synthesis of compounds **70** – **79**, compound of amine **33** (1 eq.) was dissolved in DMF at 0 °C. The coupling reagents (1.1 eq.) were added and the reaction mixture was allowed to stir at room temperature for 3 h. After the completion of the reaction, the reaction mixture was evaporated to dry (ethanol and toluene were used to co-evaporate) and the residue was purified by column chromatography to yield the compounds **70** – **79** as a solid with the yields ranging from 43 % to 87 %.

***N*-(5'-deoxy- $\beta$ -thymidin-5'-yl)-*N'*-(2-phenylphenyl)urea (70)**: 2-Phenylphenyl isocyanate reacted with amine **33** to yield compound **70** as a solid;  $^1\text{H-NMR}$  (500MHz, DMSO):  $\delta$  11.32 (s, 1H, NH), 7.90 (d,  $J = 7.90$  Hz, 1H, NH), 7.04-7.48 (m, 10H, *H6* and *H*-Ph), 6.79 (t,  $J = 5.77$  Hz, 1H, NH), 6.16 (t,  $J = 7.00$  Hz, 1H, *H1'*), 5.33 (d,  $J = 4.25$  Hz, 1H, OH), 4.11-4.14 (m, 1H, *H3'*), 3.70-3.73 (m, 1H, *H4'*), 3.43-3.48 (m, 1H, *H5'*), 3.15-3.20 (m, 1H, *H5'*), 2.04-2.14 (m, 2H, *H2'*), 1.73 (s, 3H,  $\text{CH}_3$ );  $^{13}\text{C-NMR}$  (125MHz, DMSO):  $\delta$  163.7 (*C4*), 155.6 (CO), 150.4 (*C2*), 138.6, 136.4 (*C*-Ph), 136.0 (*C6*), 136.0, 132.0, 130.2, 129.1, 128.7, 127.6, 127.3, 122.5, 122.2 (*C*-Ph), 109.8 (*C5*), 85.4 (*C1'*), 83.6 (*C4'*), 71.1 (*C3'*), 41.5 (*C5'*), 38.5 (*C2'*), 12.0 ( $\text{CH}_3$ ); LCMS ( $\text{ES}^+$ ):  $m/z$  (%) 437 (100) [ $\text{M}+\text{H}$ ] $^+$ ; HRMS ( $\text{ES}^+$ ): calcd for  $\text{C}_{23}\text{H}_{25}\text{N}_4\text{O}_5$  [ $\text{M}+\text{H}$ ] $^+$  437.1819  $m/z$ , found 437.1829  $m/z$  (-2.16 ppm).

***N*-(5'-deoxy- $\beta$ -thymidin-5'-yl)-*N'*-(4-phenylphenyl)urea (71)**: 4-Phenylphenyl isocyanate reacted with amine **33** to yield compound **71** as a solid;  $^1\text{H-NMR}$  (500MHz, DMSO):  $\delta$  11.34 (s, 1H, NH), 8.66 (s, 1H, NH), 7.28-7.62 (m, 10H, *H6* and *H*-Ph), 6.36 (t,  $J = 5.72$  Hz, 1H, NH), 6.20 (t,  $J = 7.00$

## SUPPORTING INFORMATION

Hz, 1H,  $H1'$ ), 5.37 (d,  $J = 4.15$  Hz, 1H, OH), 4.18 (d,  $J = 2.50$  Hz, 1H,  $H3'$ ), 3.79-3.81 (m, 1H,  $H4'$ ), 3.47-3.52 (m, 1H,  $H5'$ ), 3.22-3.28 (m, 1H,  $H5'$ ), 2.15-2.21 (m, 1H,  $H2'$ ), 2.06-2.10 (m, 1H,  $H2'$ ), 1.79 (s, 3H,  $CH_3$ );  $^{13}C$ -NMR (125MHz, DMSO):  $\delta$  163.7 ( $C4$ ), 155.1 (CO), 150.5 ( $C2$ ), 139.9, 139.9 ( $C$ -Ph), 136.1 ( $C6$ ), 132.8, 128.8, 126.9, 126.6, 126.0, 117.9 ( $C$ -Ph), 109.8 ( $C5$ ), 85.3, 83.7 ( $C4'$ ), 71.1 ( $C3'$ ), 41.5 ( $C5'$ ), 38.4 ( $C2'$ ), 12.1 ( $CH_3$ ); LCMS ( $ES^+$ ):  $m/z$  (%) 437 (100)  $[M+H]^+$ ; HRMS ( $ES^+$ ): calcd for  $C_{23}H_{25}N_4O_5$   $[M+H]^+$  437.1819  $m/z$ , found 437.1823  $m/z$  (-0.79 ppm).

***N*-(5'-deoxy- $\beta$ -thymidin-5'-yl)-*N'*-(1-naphthyl)urea (72):** 1-Naphthyl isocyanate reacted with amine **33** to yield compound **72** as a solid;  $^1H$ -NMR (500MHz, DMSO):  $\delta$  11.33 (s, 1H, NH), 8.61 (s, 1H, NH), 7.41-8.09 (m, 8H,  $H6$  and  $H$ -Ph), 6.83 (t,  $J = 5.51$  Hz, 1H, NH), 6.22 (t,  $J = 7.22$  Hz, 1H,  $H1'$ ), 5.39 (d,  $J = 4.26$  Hz, 1H, OH), 4.20 (m, 1H,  $H3'$ ), 3.81 (m, 1H,  $H4'$ ), 3.58 (m, 1H,  $H5'$ ), 3.29 (m, 1H,  $H5'$ ), 2.21 (m, 1H,  $H2'$ ), 2.10 (m, 1H,  $H2'$ ), 1.75 (s, 3H,  $CH_3$ );  $^{13}C$ -NMR (125MHz, DMSO):  $\delta$  163.7 ( $C4$ ), 155.6 (CO), 150.5 ( $C2$ ), 136.1 ( $C6$ ), 135.0, 133.7, 128.3, 125.9, 125.7, 125.4, 125.3, 122.0, 121.2, 116.2 ( $C$ -Ph), 109.8 ( $C5$ ), 85.3 ( $C1'$ ), 83.6 ( $C4'$ ), 71.1 ( $C3'$ ), 41.6 ( $C5'$ ), 38.4 ( $C2'$ ), 12.0 ( $CH_3$ ); LCMS ( $ES^+$ ):  $m/z$  (%) 411 (100)  $[M+H]^+$ ; HRMS ( $ES^+$ ): calcd for  $C_{21}H_{23}N_4O_5$   $[M+H]^+$  411.1663  $m/z$ , found 411.1684  $m/z$  (-5.14 ppm).

***N*-(5'-deoxy- $\beta$ -thymidin-5'-yl)-*N'*-(3-(phenoxyethyl)phenyl)urea (73):** 3-(Phenoxyethyl)phenyl isocyanate reacted with amine **33** to yield compound **73** as a solid;  $^1H$ -NMR (500MHz, DMSO):  $\delta$  11.33 (s, 1H, NH), 8.60 (s, 1H, NH), 7.52 (d,  $J = 1.15$  Hz, 1H,  $H6$ ), 7.49, 7.21-7.34, 6.92-7.00 (m, 9H,  $H$ -Ph), 6.31 (t,  $J = 5.35$  Hz, 1H, NH), 6.18 (qt,  $J = 4.68$  Hz, 1H,  $H1'$ ), 5.35 (d,  $J = 4.25$  Hz, 1H, OH), 5.03 (s, 2H,  $CH_2$ ), 4.15-4.17 (m, 1H,  $H3'$ ), 3.76-3.79 (m, 1H,  $H4'$ ), 3.45-3.47 (m, 1H,  $H5'$ ), 3.23-3.25 (m, 1H,  $H5'$ ), 2.13-2.16, 2.06-2.09 (m, 2H,  $H2'$ ), 1.77 (s, 3H,  $CH_3$ );  $^{13}C$ -NMR (125MHz, DMSO):  $\delta$  163.7 ( $C4$ ), 155.2 (CO), 150.5 ( $C2$ ), 158.3, 140.5, 137.7, 129.5, 128.7, 120.3, 116.9, 116.5, 114.7 ( $C$ -Ph), 136.0 ( $C6$ ), 85.3 ( $C1'$ ), 83.7 ( $C4'$ ), 71.1 ( $C3'$ ), 69.1 ( $CH_2$ ), 41.4 ( $C5'$ ), 39.4 ( $C2'$ ), 12.3 ( $CH_3$ ); LCMS ( $ES^+$ ):  $m/z$  (%) 467 (100)  $[M+H]^+$ ; HRMS ( $ES^+$ ): calcd for  $C_{24}H_{27}N_4O_6$   $[M+H]^+$  467.1925  $m/z$ , found 467.1910  $m/z$  (3.18 ppm).

***N*-(5'-deoxy- $\beta$ -thymidin-5'-yl)-*N'*-(2-(phenoxyethyl)phenyl)urea (74):** 2-(Phenoxyethyl)phenyl isocyanate reacted with amine **33** to yield compound **74** as a solid;  $^1H$ -NMR (500MHz, DMSO):  $\delta$  11.29 (s, 1H, NH), 7.91 (s, 1H, NH), 7.85 (qt,  $J = 2.98$  Hz, 1H, NH), 7.52 (d,  $J = 1.20$  Hz, 1H,  $H6$ ), 7.39 (qt,  $J = 3.01$  Hz, 1H,  $H$ -Ph), 7.24-7.31 (m, 3H,  $H$ -Ph), 6.89-7.03 (m, 5H,  $H$ -Ph), 6.18 (qt,  $J = 4.66$  Hz, 1H,  $H1'$ ), 5.33 (d,  $J = 4.35$  Hz, 1H, OH), 5.03 (s, 2H,  $CH_2$ ),

## SUPPORTING INFORMATION

4.16-4.18 (m, 1H,  $H3'$ ), 3.75-3.78 (m, 1H,  $H4'$ ), 3.47-3.51 (m, 1H,  $H5'$ ), 3.22-3.27 (m, 1H,  $H5'$ ), 2.13-2.17 (m, 1H,  $H2'$ ), 2.06-2.09 (m, 1H,  $H2'$ ), 1.75 (s, 3H,  $CH_3$ );  $^{13}C$ -NMR (125MHz, DMSO):  $\delta$  163.7 ( $C4$ ), 154.5 ( $CO$ ), 150.5 ( $C2$ ), 158.3, 138.0, 129.4, 129.3, 128.3, 126.4, 122.3, 121.6, 120.7, 114.8 ( $C$ -Ph), 136.1 ( $C6$ ), 109.8 ( $C5$ ), 85.4 ( $C1'$ ), 83.6 ( $C4'$ ), 71.1 ( $C3'$ ), 66.3 ( $CH_2$ ), 41.6 ( $C5'$ ), 38.4 ( $C2'$ ), 12.3 ( $CH_3$ ); LCMS ( $ES^+$ ):  $m/z$  (%) 467 (100)  $[M+H]^+$ ; HRMS ( $ES^+$ ): calcd for  $C_{24}H_{27}N_4O_6$   $[M+H]^+$  467.1925  $m/z$ , found 467.1919  $m/z$  (1.28 ppm).

***N*-(5'-deoxy- $\beta$ -thymidin-5'-yl)-*N'*-(4-benzyloxyphenyl)urea (75):** 4-Benzyloxyphenyl isocyanate reacted with amine **33** to yield compound **75** as a solid;  $^1H$ -NMR (500MHz, DMSO):  $\delta$  11.34 (s, 1H,  $NH$ ), 8.34 (s, 1H,  $NH$ ), 7.52 (s, 1H,  $H6$ ), 7.28-7.44 (m, 7H,  $H$ -Ph), 6.89 (d,  $J = 7.05$  Hz, 2H,  $H$ -Ph), 6.20 (m, 2H,  $HI'$  and  $NH$ ), 5.03 (s, 2H,  $CH_2$ -Ph), 4.17 (s, 1H,  $H3'$ ), 3.77 (m, 1H,  $H4'$ ), 3.44 (m, 1H,  $H5'$ ), 3.22 (m, 1H,  $H5'$ ), 2.16 (m, 1H,  $H2'$ ), 2.07 (m, 1H,  $H2'$ ), 1.78 (s, 3H,  $CH_3$ );  $^{13}C$ -NMR (125MHz, DMSO):  $\delta$  163.7 ( $C4$ ), 155.4 ( $CO$ ), 150.5 ( $C2$ ), 152.9, 137.3, 133.7, 128.4, 127.7, 127.6, 119.2, 114.9 ( $C$ -Ph), 136.1 ( $C6$ ), 109.8 ( $C5$ ), 85.4 ( $C1'$ ), 83.7 ( $C4'$ ), 71.1 ( $C3'$ ), 69.3 ( $CH_2$ -Ph), 41.4 ( $C5'$ ), 38.4 ( $C2'$ ), 12.1 ( $CH_3$ ); LCMS ( $ES^+$ ):  $m/z$  (%) 467 (100)  $[M+H]^+$ ; HRMS ( $ES^+$ ): calcd for  $C_{24}H_{27}N_4O_6$   $[M+H]^+$  467.1925  $m/z$ , found 467.1941  $m/z$  (-3.51 ppm).

***N*-(5'-deoxy- $\beta$ -thymidin-5'-yl)-*N'*-(4-tetrahydropyran-4-oxyphenyl)urea (76):** 4-tetrahydropyran-4-oxyphenyl isocyanate reacted with amine **33** to yield compound **76** as a solid;  $^1H$ -NMR (500MHz, DMSO):  $\delta$  11.33 (s, 1H,  $NH$ ), 8.33 (s, 1H,  $NH$ ), 7.52 (d,  $J = 1.15$  Hz, 1H,  $H6$ ), 7.25-7.28 (m, 2H,  $H$ -Ph), 6.84-6.87 (m, 2H,  $H$ -Ph), 6.16-6.21 (m, 2H,  $NH$  and  $HI'$ ), 5.34 (d,  $J = 4.25$  Hz, 1H,  $OH$ ), 4.40-4.45 (m, 1H,  $CH$ ), 4.14-4.17 (m, 1H,  $H3'$ ), 3.81-3.85 (m, 2H,  $CH_2$ ), 3.74-3.78 (m, 1H,  $H4'$ ), 3.42-3.47 (m, 2H,  $CH_2$ ), 3.16-3.24 (m, 1H,  $H5'$ ), 2.12-2.18, 2.04-2.08 (m, 2H,  $H2'$ ), 1.90-1.94 (m, 2H,  $CH_2$ ), 1.77 (s, 3H,  $CH_3$ ), 1.50-1.57 (m, 3H,  $CH_3$ );  $^{13}C$ -NMR (125MHz, DMSO):  $\delta$  163.7 ( $C4$ ), 155.4 ( $CO$ ), 150.5 ( $C2$ ), 136.0 ( $C6$ ), 151.3, 133.8, 119.3, 116.4 ( $C$ -Ph), 109.8 ( $C5$ ), 85.4 ( $C1'$ ), 83.7 ( $C4'$ ), 71.7 ( $C3'$ ), 71.1 ( $CH$ ), 64.5 ( $CH_2$ ), 41.4 ( $C5'$ ), 39.0 ( $C2'$ ), 31.8 ( $CH_2$ ), 12.3 ( $CH_3$ ); LCMS ( $ES^+$ ):  $m/z$  (%) 461 (100)  $[M+H]^+$ ; HRMS ( $ES^+$ ): calcd for  $C_{22}H_{29}N_4O_7$   $[M+H]^+$  461.2031  $m/z$ , found 461.2029  $m/z$  (0.44 ppm).

***N*-(5'-deoxy- $\beta$ -thymidin-5'-yl)-*N'*-(4-piperdin-1-ylphenyl)urea (77):** 4-Piperdin-1-ylphenyl isocyanate reacted with amine **33** to yield compound **77** as a solid;  $^1H$ -NMR (500MHz, DMSO):  $\delta$  11.30 (s, 1H,  $NH$ ), 8.21 (s, 1H,  $NH$ ), 7.52 (d,  $J = 0.8$  Hz, 1H,  $H6$ ), 7.21 (d,  $J = 8.95$  Hz, 2H,  $H$ -Ph), 6.82 (d,  $J = 8.95$  Hz, 2H,  $H$ -Ph), 6.14-6.19 (m, 2H,  $NH$  and  $HI'$ ), 5.32 (d,  $J = 4.25$  Hz, 1H,  $OH$ ), 4.14-4.18 (m, 1H,  $H3'$ ), 3.75-3.78 (m, 1H,  $H4'$ ), 3.42-3.47 (m, 1H,  $H5'$ ), 3.19-3.24 (m, 1H,  $H5'$ ),

## SUPPORTING INFORMATION

2.99 (t,  $J = 5.35$  Hz, 4H,  $CH_2$ ), 2.09-2.18, 2.05-2.09 (m, 2H,  $H2'$ ), 1.78 (s, 3H,  $CH_3$ ), 1.59-1.63 (m, 4H,  $CH_2$ ), 1.47-1.52 (m, 2H,  $CH_2$ );  $^{13}C$ -NMR (125MHz, DMSO):  $\delta$  163.7 ( $C4$ ), 155.5 ( $CO$ ), 150.5 ( $C2$ ), 136.0 ( $C6$ ), 146.9, 132.4, 119.0, 116.8 ( $C$ -Ph), 109.8 ( $C5$ ), 85.4 ( $C1'$ ), 83.7 ( $C4'$ ), 71.1 ( $C3'$ ), 50.6 ( $CH_2$ ), 41.0 ( $C5'$ ), 38.4 ( $C2'$ ), 25.4 ( $CH_2$ ), 23.8 ( $CH_2$ ), 12.3 ( $CH_3$ ); LCMS ( $ES^+$ ):  $m/z$  (%) 444 (100)  $[M+H]^+$ ; HRMS ( $ES^+$ ): calcd for  $C_{22}H_{30}N_5O_5$   $[M+H]^+$  444.2241  $m/z$ , found 444.2232  $m/z$  (2.11 ppm).

***N*-(5'-deoxy- $\beta$ -thymidin-5'-yl)-*N'*-(4-(4-methylpiperazin-1-yl)phenyl)urea (78):** 4-(4-Methylpiperazinyl)phenyl isocyanate reacted with amine **33** to yield compound **78** as a solid;  $^1H$ -NMR (500MHz, DMSO):  $\delta$  11.33 (s, 1H,  $NH$ ), 8.27, 8.24 (s, 2H,  $NH$ ), 7.52 (d,  $J = 1.10$  Hz, 1H,  $H6$ ), 7.21-7.28 (m, 2H,  $H$ -Ph), 6.81-6.87 (m, 2H,  $H$ -Ph), 6.15-6.19 (m, 1H,  $H1'$ ), 5.33 (d,  $J = 4.25$  Hz, 1H,  $OH$ ), 4.14-4.16 (m, 1H,  $H3'$ ), 3.74-3.77 (m, 1H,  $H4'$ ), 3.42-3.47 (m, 1H,  $H5'$ ), 3.18-3.23 (m, 1H,  $H5'$ ), 3.00-3.04 (m, 4H,  $CH_2$ ), 2.42-2.45 (m, 4H,  $CH_2$ ), 2.21 (s, 3H,  $CH_3$ ), 2.12-2.18 (m, 1H,  $H2'$ ), 2.04-2.08 (m, 1H,  $H2'$ ), 1.78 (s, 3H,  $CH_3$ );  $^{13}C$ -NMR (125MHz, DMSO):  $\delta$  163.7 ( $C4$ ), 155.4 ( $CO$ ), 150.5 ( $C2$ ), 136.0 ( $C6$ ), 146.3, 146.0, 132.0, 119.4, 118.9, 116.1 ( $C$ -Ph), 109.8 ( $C5$ ), 85.4 ( $C1'$ ), 83.7 ( $C4'$ ), 71.1 ( $C3'$ ), 54.7 ( $CH_2$ ), 48.9, 48.9 ( $CH_2$ ), 45.8 ( $C5'$ ), 38.4 ( $C2'$ ), 12.2 ( $CH_3$ ); LCMS ( $ES^+$ ):  $m/z$  (%) 459 (100)  $[M+H]^+$ ; HRMS ( $ES^+$ ): calcd for  $C_{22}H_{31}N_6O_5$   $[M+H]^+$  459.2350  $m/z$ , found 459.2340  $m/z$  (2.20 ppm).

***N*-(5'-deoxy- $\beta$ -thymidin-5'-yl)-*N'*-(4-(6-methyl-2-benzothiazolyl)phenyl)urea (79):** 4-(6-Methyl-2-benzothiazolyl)phenyl isocyanate reacted with amine **33** to yield compound **79** as a solid;  $^1H$ -NMR (500MHz, DMSO):  $\delta$  11.34 (s, 1H,  $NH$ ), 8.95 (s, 1H,  $NH$ ), 7.53 (d,  $J = 1.15$  Hz, 1H,  $H6$ ), 7.86-7.95, 7.57-7.59, 7.32-7.34 (m, 7H,  $H$ -Ph), 6.47 (t,  $J = 5.34$  Hz, 1H,  $NH$ ), 6.19 (qt,  $J = 4.70$  Hz, 1H,  $H1'$ ), 5.37 (d,  $J = 4.25$  Hz, 1H,  $OH$ ), 4.18-4.20 (m, 1H,  $H3'$ ), 3.79-3.80 (m, 1H,  $H4'$ ), 3.47-3.53 (m, 1H,  $H5'$ ), 3.23-3.28 (m, 1H,  $H5'$ ), 2.45 (s, 3H,  $CH_3$ ), 2.16-2.23 (m, 1H,  $H2'$ ), 2.06-2.10 (m, 1H,  $H2'$ ), 1.79 (s, 3H,  $CH_3$ );  $^{13}C$ -NMR (125MHz, DMSO):  $\delta$  163.7 ( $C4$ ), 151.8 ( $CO$ ), 150.5 ( $C2$ ), 136.1 ( $C6$ ), 145.9, 143.3, 134.2, 127.9, 125.7, 121.9, 117.6 ( $C$ -Ph), 109.8 ( $C5$ ), 85.2 ( $C1'$ ), 83.7 ( $C4'$ ), 71.1 ( $C3'$ ), 41.5 ( $C5'$ ), 38.3 ( $C2'$ ), 21.0 ( $CH_3$ ), 12.2 ( $CH_3$ ); LCMS ( $ES^+$ ):  $m/z$  (%) 508 (100)  $[M+H]^+$ ; HRMS ( $ES^+$ ): calcd for  $C_{25}H_{26}N_5O_5S_1$   $[M+H]^+$  508.1649  $m/z$ , found 508.1634  $m/z$  (3.05 ppm).

### General Procedure for compounds **81 a-e**

A suspension of 60% sodium hydride in mineral oil (2 mmol) was added to a suspension of *tert*-butyl (4-hydroxyphenyl)carbamate in 5 ml DMF under Ar and cooled with ice bath. Then

## SUPPORTING INFORMATION

appropriate substituted benzyl bromides (**80 a-e**) were added to the mixture. The reaction was left under RT for 3 h. The reaction mixture was removed DMF and purified by chromatography by Hexane/EtOAc (7/3) to give the compounds **81 a-e**.

***N*-tertbutoxycarbonyl-(4-((2-chlorobenzyl)oxy)phenyl)amine (81a)**: 2-Chlorobenzyl bromide reacted with 4-((pivaloyloxy)amino)phenol to yield compound **81a** as a solid; <sup>1</sup>H-NMR (500MHz, CDCl<sub>3</sub>): δ 7.55-7.57, 7.40-7.42, 7.26-7.32, 6.93-6.96 (m, 8H, *H*-Ph), 6.35 (s, 1H, NH), 5.16 (s, 2H, CH<sub>2</sub>), 1.53 (s, 9H, CH<sub>3</sub>); <sup>13</sup>C-NMR (125MHz, CDCl<sub>3</sub>): δ 154.6 (CO), 134.8, 132.6, 131.9, 129.4, 128.9, 128.8, 127.0, 115.3 (*C*-Ph), 76.8 (*C*(CH<sub>3</sub>)<sub>3</sub>), 67.5 (CH<sub>2</sub>), 28.4 (CH<sub>3</sub>); LCMS (ES<sup>+</sup>): m/z (%) 278 (100) [M+H]<sup>+</sup>.

***N*-tertbutoxycarbonyl-(4-((3-chlorobenzyl)oxy)phenyl)amine (81b)**: 3-Chlorobenzyl bromide reacted with 4-((pivaloyloxy)amino)phenol to yield compound **81b** as a solid; <sup>1</sup>H-NMR (500MHz, DMSO): δ 9.17 (s, 1H, NH), 7.34-7.50, 6.90-6.93 (m, 8H, *H*-Ph), 5.06 (s, 2H, CH<sub>2</sub>), 2.30 (s, 3H, CH<sub>3</sub>), 1.46 (s, 9H, CH<sub>3</sub>); <sup>13</sup>C-NMR (125MHz, DMSO): δ 153.2 (CO), 152.9, 139.9, 133.0, 133.0, 130.3, 127.6, 127.2, 119.5, 114.8 (*C*-Ph), 78.7 (*C*(CH<sub>3</sub>)<sub>3</sub>), 68.4 (CH<sub>2</sub>), 28.1 (CH<sub>3</sub>); LCMS (ES<sup>+</sup>): m/z (%) 278 (100) [M+H]<sup>+</sup>.

***N*-tertbutoxycarbonyl-(4-((4-chlorobenzyl)oxy)phenyl)amine (81c)**: 4-Chlorobenzyl bromide reacted with 4-((pivaloyloxy)amino)phenol to yield compound **81c** as a solid; <sup>1</sup>H-NMR (500MHz, CDCl<sub>3</sub>): δ 7.37, 7.28-7.29, 6.90-6.92 (m, 8H, *H*-Ph), 6.37 (s, 1H, NH), 5.01 (s, 2H, CH<sub>2</sub>), 3.83 (s, 3H, CH<sub>3</sub>), 1.53 (s, 9H, CH<sub>3</sub>); <sup>13</sup>C-NMR (125MHz, CDCl<sub>3</sub>): δ 154.5 (CO), 135.6, 133.7, 131.9, 128.8, 128.7, 120.4, 115.3 (*C*-Ph), 76.8 (*C*(CH<sub>3</sub>)<sub>3</sub>), 69.6 (CH<sub>2</sub>), 28.4 (CH<sub>3</sub>); LCMS (ES<sup>+</sup>): m/z (%) 278 (100) [M+H]<sup>+</sup>.

***N*-tertbutoxycarbonyl-(4-((4-methoxybenzyl)oxy)phenyl)amine (81d)**: 4-Methoxybenzyl bromide reacted with 4-((pivaloyloxy)amino)phenol to yield compound **81d** as a solid; <sup>1</sup>H-NMR (500MHz, CDCl<sub>3</sub>): δ 7.27-7.32, 7.00-7.02, 6.87-6.94 (m, 8H, *H*-Ph), 6.37 (s, 1H, NH), 5.03 (s, 2H, CH<sub>2</sub>), 3.83 (s, 3H, CH<sub>3</sub>), 1.53 (s, 9H, CH<sub>3</sub>); <sup>13</sup>C-NMR (125MHz, CDCl<sub>3</sub>): δ 159.8 (CO), 154.8, 138.7, 131.7, 129.6, 120.5, 119.6, 115.3, 113.5, 112.8 (*C*-Ph), 70.2 (CH<sub>2</sub>), 55.3 (CH<sub>3</sub>), 28.4 (CH<sub>3</sub>); LCMS (ES<sup>+</sup>): m/z (%) 274 (100) [M+H]<sup>+</sup>.

***N*-tertbutoxycarbonyl-(4-((4-tertbutylbenzyl)oxy)phenyl)amine (81e)**: 4-tertbutylbenzyl bromide reacted with 4-((pivaloyloxy)amino)phenol to yield compound **81e** as a solid; <sup>1</sup>H-NMR (500MHz, CDCl<sub>3</sub>): δ 7.36-7.43, 7.27-7.28, 6.92-6.95 (m, 8H, *H*-Ph), 6.35 (s, 1H, NH), 5.01 (s, 2H,

## SUPPORTING INFORMATION

$CH_2$ ), 1.53 (s, 9H,  $CH_3$ ), 1.34 (s, 9H,  $CH_3$ );  $^{13}C$ -NMR (125MHz,  $CDCl_3$ ):  $\delta$  151.0 (CO), 134.0, 127.5, 125.8, 125.5, 115.2 (C-Ph), 76.8 ( $C(CH_3)_3$ ), 70.2 ( $CH_2$ ), 34.6 ( $C(CH_3)_3$ ), 31.4 ( $CH_3$ ), 28.4 ( $CH_3$ ); LCMS ( $ES^+$ ): m/z (%) 300 (100)  $[M+H]^+$ .

### General Procedure for compounds **82a–e**

The Boc group protected **81 a–e** (1.4 mmol) was dissolved in 40 ml DCM and stirred at RT for few minutes. TFA (2 ml) was added with a syringe. The solution changed from colorless to a slight yellow. After 3 h, the reaction was evaporated under reduced pressure and purified by chromatography to get a brown to grey color solid.

**4-(2-Chlorobenzyloxy)phenyl amine (82a)**: Compound **81a** was removed the Boc group to give compound **82a** as a solid;  $^1H$ -NMR (500MHz, DMSO):  $\delta$  9.37 (s, 2H,  $NH_2$ ), 7.57-7.60, 7.51-7.54, 7.37-7.43, 7.19-7.34, 7.08-7.14 (m, 8H,  $H$ -Ph), 5.16 (s, 2H,  $CH_2$ );  $^{13}C$ -NMR (125MHz, DMSO):  $\delta$  134.0, 132.6, 130.2, 130.0, 129.4, 127.4, 123.0, 115.8 (C-Ph), 67.2 ( $CH_2$ ); LCMS ( $ES^+$ ): m/z (%) 234 (100)  $[M+H]^+$ .

**4-(3-Chlorobenzyloxy)phenyl amine (82b)**: Compound **81b** was removed the Boc group to give compound **82b** as a solid;  $^1H$ -NMR (500MHz, DMSO):  $\delta$  9.28 (s, 1H,  $NH$ ), 7.39-7.51, 7.17-7.19, 7.06-7.08 (m, 8H,  $H$ -Ph), 5.13 (s, 2H,  $CH_2$ );  $^{13}C$ -NMR (125MHz, DMSO):  $\delta$  133.1, 130.4, 127.8, 127.3, 126.2, 115.8 (C-Ph), 68.5 ( $CH_2$ ); LCMS ( $ES^+$ ): m/z (%) 234 (100)  $[M+H]^+$ .

**4-(4-Chlorobenzyloxy)phenyl amine (82c)**: Compound **81c** was removed the Boc group to give compound **82c** as a solid;  $^1H$ -NMR (500MHz, DMSO):  $\delta$  9.49 (s, 2H,  $NH_2$ ), 7.47, 7.20-7.22, 7.07-7.08 (m, 8H,  $H$ -Ph), 5.11 (s, 2H,  $CH_2$ );  $^{13}C$ -NMR (125MHz, DMSO):  $\delta$  135.8, 132.5, 129.5, 128.4, 123.3, 115.8 (C-Ph), 68.6 ( $CH_2$ ); LCMS ( $ES^+$ ): m/z (%) 234 (100)  $[M+H]^+$ .

**4-(4-Methoxybenzyloxy)phenyl amine (82d)**: Compound **81d** was removed the Boc group to give compound **82d** as a solid;  $^1H$ -NMR (500MHz, DMSO):  $\delta$  9.48 (s, 2H,  $NH_2$ ), 7.29-7.32, 7.19-7.22, 7.06-7.09, 7.00-7.01, 6.89-6.91 (m, 8H,  $H$ -Ph), 5.09 (s, 2H,  $CH_2$ ), 3.76 (s, 3H,  $CH_3$ );  $^{13}C$ -NMR (125MHz, DMSO):  $\delta$  159.3, 138.3, 129.6, 123.3, 119.7, 115.8, 113.2, 113.2 (C-Ph), 69.3 ( $CH_2$ ), 55.0 ( $CH_3$ ); LCMS ( $ES^+$ ): m/z (%) 230 (100)  $[M+H]^+$ .

**4-(4-*tert*-butylbenzyloxy)phenyl amine (82e)**: Compound **81e** was removed the Boc group to give compound **82e** as a solid;  $^1H$ -NMR (500MHz, DMSO):  $\delta$  9.37 (s, 2H,  $NH_2$ ), 7.42-7.36, 7.25-7.27, 7.08-7.10, (m, 8H,  $H$ -Ph), 5.07 (s, 2H,  $CH_2$ ), 1.28 (s, 9H,  $CH_3$ );  $^{13}C$ -NMR (125MHz, DMSO):  $\delta$

## SUPPORTING INFORMATION

157.4, 150.4, 133.7, 127.6, 125.6, 125.4, 125.2, 123.8, 115.7 (C-Ph), 69.3 (CH<sub>2</sub>), 34.3 (C(CH<sub>3</sub>)<sub>3</sub>), 31.1 (CH<sub>3</sub>); LCMS (ES<sup>+</sup>): m/z (%) 256 (100) [M+H]<sup>+</sup>.

### General Procedure for compounds **83a – e**

Et<sub>3</sub>N (0.5 mmol) was added to a solution of the amines **82a – e** in 10 ml EtOAc. The mixture was kept at 0 - 5 °C and triphosgene (2 mmol) was added. The reaction mixture was gradually brought to reflux at 77 °C for 2 h. The progression of the reaction was monitored by TLC. Excess solvent was removed in vacuo and the crude product was flashed by a short pad of SiO<sub>2</sub> to yield the isocyanates (**83a – e**). Because the isocyanates were very active, they were directly used for the next step.

***N*-(5'-deoxy-β-thymidin-5'-yl)-*N'*-(4-(2-chlorobenzoyloxy)phenyl)urea** **89**: 4-(2-Chlorobenzoyloxy)phenyl isocyanate reacted with amine **33** to yield compound **89** as a solid; <sup>1</sup>H-NMR (500MHz, DMSO): δ 11.33 (s, 1H, NH), 8.37 (s, 1H, NH), 7.57-7.59, 7.50-7.52, 7.37-7.39, 7.29-7.31, 6.90-6.92 (m, 9H, *H*6 and *H*-Ph), 6.17-6.23 (m, 1H, *H*1' and NH), 5.35 (d, *J*=4.30 Hz, 1H, OH), 5.09 (s, 2H, CH<sub>2</sub>), 4.15-4.17 (m, 1H, *H*3'), 3.75-3.77 (m, 4H, *H*4'), 3.44-3.45, 3.22-3.24 (m, 2H, *H*5'), 2.14-2.16, 2.07-2.09 (m, 2H, *H*2'), 1.78 (s, 3H, CH<sub>3</sub>); <sup>13</sup>C-NMR (125MHz, DMSO): δ 163.7 (*C*4), 155.4 (*C*O), 150.5 (*C*2), 152.8, 134.6, 134.0, 132.5, 130.00, 129.7, 129.3, 127.3, 119.2, 114.9 (C-Ph), 136.1 (*C*6), 109.8 (*C*5), 85.4 (*C*1'), 83.7 (*C*4'), 71.1 (*C*3'), 67.0 (CH<sub>2</sub>), 41.4 (*C*5'), 38.4 (*C*2'), 12.0 (CH<sub>3</sub>); LCMS (ES<sup>+</sup>): m/z (%) 501 (100) [M+H]<sup>+</sup>; HRMS (ES<sup>+</sup>): calcd for C<sub>24</sub>H<sub>26</sub>Cl<sub>1</sub>N<sub>4</sub>O<sub>6</sub> [M+H]<sup>+</sup> 501.1535 *m/z*, found 501.1516 *m/z* (3.91 ppm).

***N*-(5'-deoxy-β-thymidin-5'-yl)-*N'*-(4-(4-methoxybenzyloxy)phenyl)urea** **90**: 4-(4-Methoxybenzyloxy)phenyl isocyanate reacted with amine **33** to yield compound **90** as a solid; <sup>1</sup>H-NMR (500MHz, DMSO): δ 11.32 (s, 1H, NH), 8.33 (s, 1H, NH), 7.52 (d, *J* = 1.15 Hz, 1H, *H*6), 7.72-7.79, 6.98-7.00, 6.88-6.89 (m, 8H, *H*-Ph), 6.18-6.22 (qt, *J* = 3.48 Hz, 1H, *H*1'), 5.35 (d, *J* = 3.10 Hz, 1H, OH), 5.01 (s, 2H, CH<sub>2</sub>), 4.15-4.19 (m, 1H, *H*3'), 3.75-3.78 (m, 4H, *H*4' and CH<sub>3</sub>), 3.42-3.46, 3.18-3.24 (m, 2H, *H*5'), 2.13-2.17, 2.05-2.08 (m, 2H, *H*2'), 1.77 (s, 3H, CH<sub>3</sub>); <sup>13</sup>C-NMR (125MHz, DMSO): δ 163.7 (*C*4), 150.5 (*C*2), 155.4 (*C*O), 152.9, 137.3, 133.7, 128.4, 127.7, 127.6, 119.2, 114.9 (C-Ph), 136.1 (*C*6), 109.8 (*C*5), 85.37 (*C*1'), 83.7 (*C*4'), 71.1 (*C*3'), 69.3 (CH<sub>2</sub>-Ph), 41.4 (*C*5'), 38.4 (*C*2'), 12.1 (CH<sub>3</sub>); LCMS (ES<sup>+</sup>): m/z (%) 497 (100) [M+H]<sup>+</sup>; HRMS (ES<sup>+</sup>): calcd for C<sub>25</sub>H<sub>29</sub>N<sub>4</sub>O<sub>7</sub> [M+H]<sup>+</sup> 497.2031 *m/z*, found 497.2017 *m/z* (2.74 ppm).



## References

1. Whittingham, J. L.; Carrero-Lerida, J.; Brannigan, J. A.; Ruiz-Perez, L. M.; Silva, A. P. G.; Fogg, M. J.; Wilkinson, A. J.; Gilbert, I. H.; Wilson, K. S.; Gonzalez-Pacanowska, D. Structural basis for the efficient phosphorylation of AZT-MP (3'-azido-2'-deoxythymidine monophosphate) and dGMP by *Plasmodium falciparum* type I thymidylate kinase. *Biochem. J.* **2010**, *428*, 499-509.
2. Smilkstein, M.; Sriwilajaroen, N.; Kelly, J. X.; Wilairat, P.; Riscoe, M. Simple and inexpensive fluorescence-based technique for high-throughput antimalarial drug screening. *Antimicrob. Agents Chemother.* **2004**, *48*, 1803-6.
3. Cui, H. Q.; Ruiz-Perez, L. M.; Gonzalez-Pacanowska, D.; Gilbert, I. H. Potential application of thymidylate kinase in nucleoside analogue activation in *Plasmodium falciparum*. *Bioorg. Med. Chem.* **2010**, *18*, 7302-7309.
4. Brand, S.; Cleghorn, L. A. T.; McElroy, S. P.; Robinson, D. A.; Smith, V. C.; Hallyburton, I.; Harrison, J. R.; Norcross, N. R.; Norval, S.; Spinks, S.; Stojanovski, L.; Torrie, L. S.; Frearson, J. A.; Brenk, R.; Fairlamb, A. H.; Ferguson, M. A. J.; Read, K. D.; Wyatt, P. G.; Gilbert, I. H. Discovery of a novel class of orally active trypanocidal N-myristoyltransferase inhibitors. *J. Med. Chem.* **2012**, *55*, 140-152.
5. Leslie, A. G. W. Integration of macromolecular diffraction data. *Acta Crystallogr. D* **1999**, *55*, 1696-1702.
6. (a) McNicholas, S.; Potterton, E.; Wilson, K. S.; Noble, M. E. M. Presenting your structures: the CCP4mg molecular-graphics software. *Acta Crystallogr. D* **2011**, *67*, 386-394. (b) Winn, M. D.; Ballard, C. C.; Cowtan, K. D.; Dodson, E. J.; Emsley, P.; Evans, P. R.; Keegan, R. M.; Krissinel, E. B.; Leslie, A. G.; McCoy, A.; McNicholas, S. J.; Murshudov, G. N.; Pannu, N. S.; Potterton, E. A.; Powell, H. R.; Read, R. J.; Vagin, A.; Wilson, K. S. Overview of the CCP4 suite and current developments. *Acta Crystallogr. D* **2011**, *67*, 235-242.
7. Murshudov, G. N.; Vagin, A. A.; Dodson, E. J. Refinement of macromolecular structures by the maximum-likelihood method. *Acta Crystallogr. D* **1997**, *53*, 240-255.
8. Emsley, P.; Cowtan, K. Coot: model-building tools for molecular graphics. *Acta Crystallogr. D* **2004**, *60*, 2126-2132.
9. Schuttelkopf, A. W.; van Aalten, D. M. F. PRODRG: a tool for high-throughput crystallography of protein-ligand complexes. *Acta Crystallogr. D* **2004**, *60*, 1355-1363.
10. Van Daele, I.; Munier-Lehmann, H.; Froeyen, M.; Balzarini, J.; Van Calenbergh, S. Rational design of 5'-thiourea-substituted alpha-thymidine analogues as thymidine monophosphate kinase inhibitors capable of inhibiting mycobacterial growth. *J. Med. Chem.* **2007**, *50*, 5281-5292.
